# Supplementary material for: Bi-channel image registration and deep-learning segmentation (BIRDS) for efficient, versatile 3D mapping of mouse brain
Source: eLife journal article supplement (doi:10.7554/elife.63455), 2021-01-18
Supplement: fig2-data1 [file figure2.xlsx]

## Sheet: figure2_d
	brain1										brain2										brain3										brain4										brain5
aMAP	305.383	116.863	161.752	312.071	290.704	298.961	98.0507	71.8397	312.482	323.386	202.049	51.4536	73.315	172.173	171.534	100.855	131.96	142.913	162.575	129.827	367.863	322.882	352.951	349.211	470.44	269.603	123.628	195.811	336.44	391.465	351.669	310.422	320.237	318.934	329.891	311.058	101.161	311.234	268.024	285.487	342.611	209.906	275.082	496.643	407.318	268.765	485.4	211.382	423.312
ClearMap	137.746	114.021	103.345	112.595	211.462	133.538	73.7782	180.617	264.003	145.392	113.207	95.5447	140.457	128.592	149.606	113.042	112.008	96.1656	96.0916	101.107	312.484	173.527	207.306	91.4201	103.887	195.414	103.26	215.731	362.236	258.553	269.05	361.85	335.722	150.235	222.959	205.844	419.335	489.127	410.511	403.599	232.006	206.17	243.785	380.254	261.914	142.36	212.21	170.527	215.826
MIRCL	82.5769	111.577	88.0714	119.088	118.335	60.3861	117.201	117.129	168.594	192.128	150.194	107.793	102.629	124.339	106.172	115.263	76.659	80.4421	119.683	114.649	209.657	236.429	141.442	87.8479	77.4062	190.527	171.499	141.701	131.825	153.157	251.588	162.387	123.303	234.267	199.33	115.948	53.8735	123.618	156.185	96.0959	239.896	66.6909	186.705	238.46	302.914	241.673	302.744	175.932	232.75
BIRDS	74.9059	50.4367	90.1056	74.6735	153.146	102.337	73.5969	48.9244	91.0719	135.49	71.3441	70.4302	91.222	65.4333	55.9556	84.9808	73.8348	83.5916	58.7209	50.9318	174.555	94.2823	136.234	143.326	59.2641	189.777	152.072	100.675	111.89	94.3581	168.587	161.95	104.356	154.956	171.041	96.4454	55.3648	118.746	192.893	60.9405	149.257	82.072	182.134	76.0498	100.998	151.459	106.155	173.635	104.913
[truncated: 1 more columns]

## Sheet: figure2_e
	brain1																																													brain2
aMAP	0.790481	0.7717	0.819144	0.798801	0.712979	0.790169	0.790161	0.726985	0.752701	0.77849	0.7765	0.791803	0.862002	0.859901	0.777326	0.824732	0.8694	0.877212	0.817579	0.731183	0.85581	0.802312	0.713806	0.8	0.780645	0.731107	0.721361	0.690917	0.737106	0.786524	0.640348	0.666667	0.740453	0.614536	0.626269	0.742807	0.83379	0.883247	0.874867	0.787489	0.754502	0.70595	0.630787	0.72447	0.782976	0.811725	0.846123	0.930269	0.932139
ClearMap	0.704772	0.785365	0.835754	0.927559	0.916842	0.820668	0.878176	0.881072	0.927191	0.930992	0.737259	0.889909	0.884451	0.878469	0.889819	0.826277	0.910967	0.929888	0.901366	0.901513	0.806971	0.748926	0.737419	0.723102	0.749282	0.784629	0.890974	0.931327	0.916533	0.910973	0.612643	0.686126	0.680439	0.76805	0.883925	0.881712	0.875391	0.876559	0.865689	0.834118	0.699404	0.760398	0.690989	0.681806	0.677294	0.847201	0.928836	0.937661	0.941176
MIRCL	0.869686	0.913251	0.93382	0.928381	0.924619	0.822994	0.920668	0.915416	0.929243	0.935223	0.818425	0.806901	0.824828	0.844012	0.812796	0.880037	0.907101	0.893294	0.912815	0.825448	0.864638	0.909082	0.85538	0.857153	0.812559	0.805543	0.881441	0.908452	0.902133	0.896494	0.741478	0.729586	0.884661	0.810383	0.894028	0.884464	0.867983	0.872634	0.860009	0.86109	0.792703	0.731769	0.62714	0.66377	0.708579	0.883239	0.92255	0.943119	0.924246
BIRDS	0.921708	0.90401	0.939987	0.937947	0.927536	0.935681	0.921708	0.950106	0.98034	0.956644	0.742954	0.822743	0.815881	0.953142	0.921708	0.806655	0.931327	0.908452	0.952	0.893489	0.908555	0.803567	0.88926	0.931327	0.69524	0.96266	0.958287	0.947021	0.925019	0.923937	0.727425	0.744811	0.813839	0.764956	0.986056	0.972798	0.937054	0.937054	0.965586	0.969621	0.820702	0.733038	0.691931	0.627668	0.74258	0.875659	0.956034	0.932712	0.924661
[truncated: 176 more columns]

## Sheet: figure2_f
	aMAP																									ClearMap
ACA	0.790481	0.7717	0.819144	0.798801	0.712979	0.811725	0.846123	0.930269	0.932139	0.931599	0.676464	0.802114	0.865906	0.890797	0.902515	0.69298	0.60338	0.711044	0.753135	0.798646	0.619289	0.913695	0.887066	0.811503	0.769888	0.704772	0.785365	0.835754	0.927559	0.916842	0.847201	0.928836	0.937661	0.941176	0.928426	0.843628	0.922004	0.904629	0.879348	0.848625	0.881802	0.876054	0.855469	0.817709	0.710616	0.720246	0.906455	0.91663	0.83357
ENT	0.790169	0.790161	0.726985	0.752701	0.77849	0.877669	0.919662	0.849935	0.867229	0.916258	0.795768	0.872716	0.813451	0.682203	0.947529	0.751502	0.806221	0.664078	0.813362	0.913309	0.574372	0.67337	0.54689	0.55898	0.682867	0.820668	0.878176	0.881072	0.927191	0.930992	0.935257	0.923875	0.938664	0.928054	0.935821	0.837152	0.825217	0.803117	0.69204	0.953335	0.751502	0.818347	0.703469	0.775492	0.888556	0.766043	0.877103	0.759922	0.863961
MV	0.7765	0.791803	0.862002	0.859901	0.777326	0.713122	0.780837	0.795074	0.770823	0.85367	0.613936	0.676497	0.712727	0.622492	0.53715	0.7677	0.747635	0.70559	0.696519	0.606026	0.547884	0.605357	0.730396	0.729799	0.493094	0.737259	0.889909	0.884451	0.878469	0.889819	0.743806	0.937726	0.920113	0.91562	0.915701	0.514828	0.590464	0.563106	0.531398	0.51424	0.789	0.606026	0.606026	0.616026	0.696519	0.507227	0.514032	0.498012	0.454212
PAG	0.824732	0.8694	0.877212	0.817579	0.731183	0.816968	0.882629	0.907021	0.967027	0.909637	0.525779	0.777107	0.865704	0.793059	0.77339	0.830374	0.851756	0.795506	0.791113	0.838033	0.789474	0.402571	0.651462	0.733261	0.663373	0.826277	0.910967	0.929888	0.901366	0.901513	0.887892	0.942328	0.91616	0.947892	0.916049	0.844923	0.896637	0.915428	0.866636	0.817256	0.72321	0.791113	0.606026	0.77489	0.72321	0.795597	0.525677	0.794181	0.853247
RT	0.85581	0.802312	0.713806	0.8	0.780645	0.832818	0.749632	0.83127	0.863843	0.874065	0.513423	0.495228	0.497535	0.51519	0.518027	0.527548	0.592154	0.486682	0.595875	0.565645	0.473469	0.453505	0.433044	0.540084	0.484835	0.806971	0.748926	0.737419	0.723102	0.749282	0.885572	0.799678	0.863106	0.902295	0.825267	0.517082	0.545708	0.583867	0.572386	0.595945	0.595875	0.598873	0.53597	0.46997	0.48851	0.569208	0.512437	0.427259	0.440191
SSp	0.731107	0.721361	0.690917	0.737106	0.786524	0.796153	0.8535	0.915898	0.931041	0.903593	0.837911	0.822125	0.847618	0.907829	0.710604	0.749337	0.805571	0.849616	0.831529	0.808434	0.815749	0.865811	0.827708	0.730961	0.602379	0.784629	0.890974	0.931327	0.916533	0.910973	0.879905	0.910142	0.941652	0.933677	0.911005	0.89805	0.860682	0.877257	0.892193	0.751068	0.647928	0.792452	0.743116	0.701137	0.742334	0.814847	0.899708	0.909331	0.879401
SUB	0.640348	0.666667	0.740453	0.614536	0.626269	0.822045	0.894991	0.896849	0.899346	0.828559	0.545743	0.526277	0.56696	0.593293	0.512415	0.468657	0.484287	0.593291	0.665858	0.53986	0.492051	0.403809	0.64879	0.525071	0.525197	0.612643	0.686126	0.680439	0.76805	0.883925	0.888796	0.903024	0.913406	0.89848	0.888708	0.648438	0.59331	0.666291	0.532945	0.573084	0.53986	0.493291	0.5291	0.6584	0.484287	0.689174	0.587219	0.529058	0.551503
VISp	0.742807	0.83379	0.883247	0.874867	0.787489	0.939278	0.890202	0.941163	0.941666	0.891765	0.897203	0.910191	0.903631	0.825859	0.815852	0.83543	0.820303	0.805631	0.797853	0.765674	0.509232	0.560015	0.571411	0.581723	0.501043	0.881712	0.875391	0.876559	0.865689	0.834118	0.939552	0.947956	0.964419	0.962478	0.938195	0.912043	0.923452	0.931781	0.850554	0.852014	0.830689	0.758891	0.786865	0.809771	0.857342	0.847574	0.838084	0.85083	0.843425
VMH	0.754502	0.70595	0.630787	0.72447	0.782976	0.84811	0.81628	0.834646	0.815009	0.875357	0.538583	0.686827	0.739103	0.755605	0.793249	0.588121	0.577953	0.64568	0.627898	0.554437	0.420316	0.533363	0.577063	0.503226	0.525197	0.699404	0.760398	0.690989	0.681806	0.677294	0.846395	0.931944	0.921306	0.959883	0.845048	0.867386	0.85676	0.769461	0.832311	0.642894	0.897122	0.445217	0.46252	0.458708	0.493869	0.468609	0.487337	0.497366	0.52485
[truncated: 51 more columns]
