# Supplementary material for: Bi-channel image registration and deep-learning segmentation (BIRDS) for efficient, versatile 3D mapping of mouse brain
Source: eLife journal article supplement (doi:10.7554/elife.63455), 2021-01-18
Supplement: fig2-figsupp3-data1 [file figureSI7.xlsx]

## Sheet: SI7_a,b
	brain1-single	brain1-multi	brain5-single	brain5-multi
1	153.328	74.9059	410.166	149.257
2	116.032	50.4367	335.805	82.072
3	73.7354	90.1056	353.734	182.134
4	157.23	74.6735	149.476	76.0498
5	230.61	153.146	134.825	100.998
6	108.617	102.337	118.195	151.459
7	88.1425	73.5969	158.741	106.155
8	81.9145	48.9244	201.651	173.635
9	106.414	91.0719	188.44	104.913
10	201.83	135.49	134.867	59.6966

## Sheet: SI7_c,d
	brain1-single					brain1-multi(BIRDS)					brain5-single					brain5-multi(BIRDS)
ACA	0.826526	0.868634	0.763573	0.767271	0.856999	0.921708	0.90401	0.939987	0.937947	0.927536	0.563269	0.829959	0.83775	0.85633	0.809675	0.922507	0.963156	0.924074	0.924126	0.941098
ENT	0.814952	0.875857	0.877223	0.725913	0.816458	0.935681	0.921708	0.950106	0.98034	0.956644	0.613381	0.649492	0.539865	0.539745	0.736538	0.877361	0.922507	0.922917	0.947361	0.857402
MV	0.767376	0.733051	0.795758	0.877696	0.661901	0.742954	0.822743	0.815881	0.953142	0.921708	0.661513	0.624381	0.730994	0.708292	0.585164	0.731685	0.782002	0.931442	0.876144	0.898349
PAG	0.824331	0.83974	0.936377	0.904906	0.930869	0.806655	0.931327	0.908452	0.952	0.893489	0.817925	0.743714	0.682389	0.763168	0.684956	0.922917	0.881183	0.931442	0.919599	0.880822
RT	0.662827	0.750031	0.784223	0.668479	0.659809	0.908555	0.803567	0.88926	0.931327	0.69524	0.638563	0.597028	0.587704	0.58484	0.404941	0.838269	0.921959	0.796849	0.714655	0.846586
SSp	0.803713	0.989813	0.921228	0.885588	0.92988	0.96266	0.958287	0.947021	0.925019	0.923937	0.783103	0.905676	0.863511	0.752554	0.582121	0.845163	0.944635	0.946586	0.928295	0.928492
SUB	0.857955	0.716513	0.738541	0.815032	0.808118	0.727425	0.744811	0.813839	0.764956	0.986056	0.720037	0.621071	0.64991	0.565331	0.646196	0.928295	0.832554	0.798953	0.828295	0.833207
VISp	0.978116	0.969169	0.968828	0.925193	0.843189	0.972798	0.937054	0.937054	0.965586	0.969621	0.642379	0.680565	0.757669	0.797599	0.806145	0.924002	0.902781	0.901121	0.873179	0.832694
VMH	0.714346	0.734739	0.824931	0.837536	0.85565	0.820702	0.733038	0.691931	0.627668	0.74258	0.59671	0.601842	0.601317	0.528623	0.455849	0.777324	0.794475	0.79459	0.652723	0.645957
