# Supplementary material for: Bi-channel image registration and deep-learning segmentation (BIRDS) for efficient, versatile 3D mapping of mouse brain
Source: eLife journal article supplement (doi:10.7554/elife.63455), 2021-01-18
Supplement: fig2-figsupp4-data1 [file figureSI8.xlsx]

## Sheet: SI8_a
	aMAP
root	0.953737	0.948974	0.949107	0.949351	0.949006	0.948176	0.938381	0.938583	0.93901	0.9419	0.944482	0.945101	0.944676	0.944876	0.945092	0.945013	0.944231	0.943157	0.943589	0.949085	0.950697	0.952422	0.953079	0.95417	0.955124	0.956203	0.956695	0.956112	0.95569	0.955491	0.955928	0.956965	0.958257	0.95857	0.959703	0.958188	0.957282	0.9561	0.956025	0.945914	0.94021	0.942717	0.940038	0.936302	0.946714	0.949595	0.948569	0.946166	0.941838
Isocortex	0.912389	0.926193	0.927767	0.933444	0.938134	0.92105	0.875997	0.851173	0.865768	0.864107	0.867119	0.864849	0.856734	0.858748	0.851828	0.839743	0.825717	0.814134	0.803782	0.797348	0.792956	0.789858	0.789077	0.790141	0.795293	0.800397	0.802132	0.811664	0.822828	0.83232	0.844255	0.845494	0.845834	0.843375	0.841893	0.841196	0.840145	0.84021	0.841553	0.841764	0.846747	0.849407	0.852735	0.851726	0.849323	0.853428	0.848913	0.846456	0.84314
OLF	0.872075	0.884489	0.878062	0.855613	0.793066			0.772272	0.779108	0.779205	0.782758	0.75414					0.794415	0.797254	0.79164	0.805381	0.810229	0.837828	0.827573	0.822967	0.760974	0.77602	0.762943	0.742983
HIP		0.679691	0.764204	0.776678	0.838824	0.861245	0.878172	0.860269	0.909939	0.908166	0.910594	0.931063	0.938041	0.93176	0.932004	0.932385	0.927798	0.923832	0.915968	0.906397	0.876897	0.900872	0.913926	0.917245	0.919151	0.926852	0.926855	0.923573	0.931313	0.933346	0.931965	0.920084	0.931254	0.931823	0.919214	0.926819	0.924199	0.923459	0.917085	0.90656	0.901412	0.888961	0.887918	0.862074	0.853008	0.845114	0.842422	0.815476	0.771964
CP	0.676684	0.727753	0.781792	0.811993	0.835273	0.846729	0.85736	0.866719	0.874398	0.885137	0.884332	0.879562	0.873638	0.86489	0.853786	0.842307	0.833544	0.819974	0.809368	0.804187	0.790808																						0.744789	0.762015	0.760196	0.773685	0.760112	0.764238	0.7217
TH	0.856522	0.854486	0.904623	0.929871	0.932008	0.933756	0.937565	0.922483	0.905178	0.910592	0.915873	0.922297	0.925109	0.932895	0.937853	0.942422	0.942301	0.952964	0.948153	0.94835	0.947078	0.94598	0.944485	0.93752	0.933825	0.917078	0.91755	0.920911	0.872986	0.881941	0.838445	0.825367	0.83656	0.836176	0.833948	0.840801	0.868384	0.87752	0.887153	0.890052	0.890066	0.890812	0.883355	0.873719	0.867541	0.848651	0.841102	0.80484	0.778811
HY	0.766129	0.809279	0.830718	0.843308	0.850638	0.851964	0.85511	0.851688	0.85041	0.852229	0.881686	0.872869	0.86978	0.878867	0.87495	0.867412	0.872397	0.878734	0.882565	0.886196	0.889775	0.88414	0.88873	0.885927	0.878868	0.871683	0.878145	0.877639	0.878956	0.874242	0.875856	0.86858	0.877702	0.87604	0.880894	0.879726	0.878798	0.87651	0.872939	0.878003	0.870851	0.870386	0.858558	0.852773	0.82579	0.825059	0.817702	0.778098	0.728853
MB	0.777809	0.833737	0.8618	0.896589	0.911245	0.922669	0.926441	0.936647	0.937449	0.932999	0.92483	0.91555	0.915697	0.923458	0.934167	0.925723	0.930267	0.929791	0.93309	0.946683	0.952519	0.954775	0.951169	0.945615	0.942433	0.940489	0.932254	0.919591	0.91709	0.910906	0.901387	0.901714	0.896725	0.886362	0.870489	0.858403	0.849394	0.814382	0.826187	0.802202	0.814533	0.778625	0.778969	0.786565	0.843138	0.849672	0.843854	0.797368	0.863578
HB	0.79002	0.756744	0.916489	0.896722	0.831317	0.796242	0.818068	0.806711	0.841906	0.863699	0.873531	0.878413	0.900857	0.864468	0.842296	0.822162	0.828269	0.834759	0.847483	0.806398	0.801092	0.805785	0.812975	0.819383	0.820683	0.826145	0.827683	0.855781	0.85792	0.890062	0.89539	0.902218	0.899949	0.873662	0.888408	0.873902	0.887651	0.885193	0.882803	0.887189	0.890634	0.896286	0.89454	0.888467	0.87911	0.873938	0.859133	0.849285	0.841457
CB	0.792468	0.837406	0.841734	0.837214	0.803339	0.770988	0.757248	0.765142									0.740888	0.758417	0.761066	0.79069	0.804233	0.800103	0.81877	0.824511	0.819151	0.822417	0.821029	0.816941	0.812309	0.815486	0.815067	0.813193	0.810975	0.821602	0.829385	0.8284	0.825812	0.830075	0.828624	0.81781	0.809721	0.81052	0.810621	0.805708	0.804083	0.809183	0.815187	0.816077	0.820225
[truncated: 951 more columns]

## Sheet: SI8_b
	brain1
aMAP	0.792468	0.841734	0.803339	0.757248	0.706968	0.705165	0.720511	0.718476	0.740888	0.761066	0.804233	0.81877	0.819151	0.821029	0.812309	0.815067	0.810975	0.829385	0.825812	0.828624	0.809721	0.810621	0.804083	0.815187	0.820225	0.676684	0.781792	0.835273	0.85736	0.874398	0.884332	0.873638	0.853786	0.833544	0.809368	0.790808	0.734103	0.728626	0.718716	0.659862	0.670716	0.673823	0.695809	0.68935	0.681244	0.729637	0.744789	0.760196	0.760112
ClearMap	0.766479	0.788929	0.803837	0.785056	0.799784	0.812236	0.84466	0.847496	0.853875	0.854878	0.862523	0.875255	0.870423	0.881816	0.884339	0.881606	0.863994	0.868567	0.891432	0.905084	0.907452	0.920775	0.919669	0.911631	0.896575	0.901589	0.940247	0.950684	0.961294	0.965232	0.969534	0.969637	0.973928	0.970027	0.975274	0.971429	0.960386	0.959901	0.95618	0.933213	0.944804	0.946286	0.953575	0.949738	0.943877	0.944359	0.946122	0.930625	0.914701
MIRCL				0.756231	0.765133	0.765156	0.79055	0.778612	0.822318	0.831646	0.835058	0.832957	0.840279	0.821942	0.812958	0.817657	0.856061	0.853288	0.854203	0.848837	0.857165	0.858908	0.858775	0.845841	0.838214		0.771149	0.876559	0.929012	0.951381	0.958424	0.96235	0.958926	0.956743	0.951804	0.947263	0.93136	0.933445	0.926471	0.89992	0.910098	0.907896	0.909098	0.895201	0.879769	0.907046	0.918981	0.92281	0.930037
BIRDS	0.984254	0.99103	0.985765	0.979757	0.974249	0.982569	0.975441	0.968401	0.96827	0.934501	0.9551	0.964302	0.963467	0.963544	0.965983	0.967855	0.970253	0.972804	0.984254	0.99103	0.985765	0.979757	0.974249	0.982569	0.975441	0.968401	0.902515	0.896336	0.89439	0.891949	0.947263	0.93136	0.933445	0.926471	0.89992	0.910098	0.907896	0.909098	0.895201	0.879769	0.907046	0.918981	0.983516	0.947263	0.93136	0.933445	0.926471	0.89992	0.910098
[truncated: 1,196 more columns]
