# Supplementary material for: Bi-channel image registration and deep-learning segmentation (BIRDS) for efficient, versatile 3D mapping of mouse brain
Source: eLife journal article supplement (doi:10.7554/elife.63455), 2021-01-18
Supplement: fig3-data1 [file figure3.xlsx]

## Sheet: figure3_e_project_strenth
	neuron5	neuron4	neuron3	neuron2	neuron1
VIS	1	1	1	1	1
AUDpo		0.0118683		0.0270101	0.00230238
AUDd		0.0206738
TEa		0.020291	0.00370142	0.188442	0.0310821
SSp-bfd		0.0187596			0.0153492
RSPagl	0.0270436
ENTm	0.000614628
ECT			0.00740284
CP			0.0160395
LA			0.167798
IA			0.00185071
CEA			0.0610734
BLA			0.0629241
