# Supplementary material for: Bi-channel image registration and deep-learning segmentation (BIRDS) for efficient, versatile 3D mapping of mouse brain
Source: eLife journal article supplement (doi:10.7554/elife.63455), 2021-01-18
Supplement: fig4-data1 [file figure4.xlsx]

## Sheet: figure4_c_density
SS	MO	ECT	VIS	TEa	VISC	AUD	GU	PERI	ORB	RSP	PL	AI	HPF	BS	CTXsp	OLF	PAL	CB	STR
844.708	421.796	195.925	174.902	143.914	126.456	103.405	91.0497	80.1936	78.5007	75.4904	19.6169	17.9206	6.84202	4.46789	4.04774	3.33773	1.24051	0.357451	0.294115

## Sheet: figure4_d_cell_number_comp
	birds	imaris	manusl
SS	33152	28199	24549
MO	11095	10113	8161
VIS	2234	1859	1674
RSP	826	892	724
AUD	608	470	559
BS	549	23	499
TEa	420	375	406
ORB	378	404	355
ECT	301	194	287
HPF	296	224	273
VISC	287	192	268
GU	152	101	143
AI	133	114	129
OLF	86	81	80
PERI	56	55	53
PL	44	44	41
CTXsp	35	33	34
STR	16	2784	15
PAL	15	14	14
CB	12	11	11
	50695	46182	38275

## Sheet: figure4_e_comp_manual_
	birds	imaris	manusl
SS	1.35044	1.14868	1
MO	1.35952	1.23919	1
VIS	1.33453	1.11051	1
RSP	1.14088	1.23204	1
AUD	1.08766	0.840787	1
BS	1.1002	0.046092	1
TEa	1.03448	0.923645	1
ORB	1.06479	1.13803	1
ECT	1.04878	0.675958	1
HPF	1.08425	0.820513	1
VISC	1.0709	0.716418	1
GU	1.06294	0.706294	1
AI	1.03101	0.883721	1
OLF	1.075	1.0125	1
PERI	1.0566	1.03774	1
PL	1.07317	1.07317	1
CTXsp	1.02941	0.970588	1
STR	1.06667	185.6	1
PAL	1.07143	1	1
CB	1.09091	1	1
