# Supplementary material for: Bi-channel image registration and deep-learning segmentation (BIRDS) for efficient, versatile 3D mapping of mouse brain
Source: eLife journal article supplement (doi:10.7554/elife.63455), 2021-01-18
Supplement: fig5-figsupp1-data1 [file figureSI11.xlsx]

## Sheet: SI11_a
Isocortex	HPF	OLF	CTXsp	STR	PAL	CB	DORsm	DORpm	HY	MBsen	MBmot	MBsta	P-sen	P-mot	P-sat	MY-sen	MY-mot
0.837095	0.83313	0.840981	0.808746	0.800572	0.722353	0.728449	0.81901	0.742408	0.827833	0.824137	0.881686	0.749757	0.835071	0.752527	0.798846	0.87611	0.713316
0.890644	0.863943	0.823831	0.801382	0.836894	0.748196	0.743027	0.826149	0.758576	0.805523	0.829367	0.886095	0.790382	0.855849	0.753014	0.767989	0.889068	0.744921
0.882787	0.836768	0.825173	0.8025	0.796691	0.743202	0.76423	0.835577	0.854093	0.794385	0.853883	0.907687	0.77962	0.848583	0.764114	0.810727	0.888266	0.780848
0.889976	0.86538	0.838568	0.810425	0.824067	0.776196	0.788709	0.841387	0.861515	0.763109	0.836657	0.940224	0.723752	0.848229	0.806047	0.822643	0.88221	0.794999
0.845078	0.905481	0.796748	0.819023	0.863087	0.771616	0.789973	0.835575	0.860921	0.760955	0.88507	0.92663	0.735537	0.849727	0.818257	0.826799	0.868762	0.802865
0.875505	0.929517	0.814254	0.822996	0.894057	0.734722	0.821738	0.828521	0.844798	0.780371	0.875646	0.939914	0.746329	0.825705	0.800228	0.830123	0.813101	0.811043
0.885537	0.802989	0.839719	0.813916	0.891176	0.770548	0.829359	0.821408	0.869034	0.787558	0.900813	0.92965	0.740338	0.806448	0.852366	0.864726	0.790888	0.806191
0.934678	0.880597	0.830791	0.807496	0.883156	0.738127	0.833858	0.823179	0.837006	0.805942	0.884032	0.9372	0.752601	0.804961	0.829548	0.85692	0.789328	0.83773
0.936946	0.858357	0.82231	0.823872	0.884192	0.753247	0.856643	0.824177	0.813022	0.774254	0.884133	0.892865	0.752731	0.813073	0.814713	0.853274	0.833455	0.830029
0.949744	0.864086	0.866299	0.837951	0.883678	0.753006	0.863867	0.81999	0.804561	0.772588	0.88412	0.845624	0.734543	0.827762	0.76467	0.868037	0.845968	0.839272
0.935492	0.900401	0.869599	0.838351	0.898412	0.752726	0.866812	0.841533	0.795619	0.794161	0.892768	0.80076	0.729503	0.846423	0.768931	0.84562	0.873821	0.8271
0.953444	0.852687	0.877727	0.808738	0.914645	0.731418	0.87249	0.852574	0.800158	0.7961	0.911672	0.745023	0.741176	0.854484	0.76857	0.864437	0.881794	0.832276
0.948177	0.851483	0.898333	0.806142	0.906466	0.691755	0.855709	0.833368	0.773714	0.793712	0.92437	0.708082	0.736103	0.882035	0.757576	0.862999	0.841576	0.812778
0.947239	0.914651	0.894197	0.81318	0.909695	0.687732	0.882841	0.858928	0.709738	0.783623	0.920209	0.684674	0.736328	0.877497	0.725046	0.859244	0.851423	0.800925
0.960631	0.832251	0.896159	0.825131	0.918835	0.741918	0.884627	0.851086	0.714576	0.785551	0.912268	0.658499	0.748241	0.883878	0.730014	0.872991	0.850223	0.837438
0.94676	0.862481	0.889034	0.853584	0.92093	0.733475	0.887783	0.847153	0.721516	0.784332	0.910069	0.643453	0.761231	0.855843	0.723158	0.878055	0.880695	0.878351
0.945873	0.843103	0.895801	0.839001	0.923417	0.716706	0.88646	0.833505	0.711333	0.721554	0.907858	0.674214	0.772727	0.802616	0.812823	0.88999	0.893302	0.872089
0.959295	0.812917	0.882182	0.831258	0.923655	0.739066	0.889689	0.835047	0.709735	0.796866	0.901101	0.662346	0.781384	0.72618	0.841021	0.897192	0.872768	0.896878
0.941113	0.831696	0.87091	0.848898	0.922144	0.721519	0.867387	0.835685	0.726846	0.785563	0.892625	0.726647	0.794921	0.710333	0.846455	0.884799	0.873362	0.883803
0.95325	0.821196	0.867909	0.853574	0.922405	0.710073	0.84588	0.856889	0.718243	0.78345	0.899809	0.74187	0.736016	0.742407	0.857566	0.871414	0.893536	0.888633
0.95518	0.76267	0.859393	0.870468	0.927582	0.78127	0.841624	0.864798	0.700436	0.779579	0.902218	0.778385	0.729573	0.751723	0.856914	0.874341	0.907498	0.891434
0.947396	0.787426	0.870098	0.88909	0.939396	0.739285	0.829058	0.885032	0.669071	0.809936	0.896609	0.766561	0.700464	0.758934	0.864212	0.86342	0.909065	0.885258
0.962796	0.818917	0.884655	0.893032	0.938974	0.673161	0.828144	0.875921	0.69522	0.794434	0.895552	0.792834	0.646132	0.762647	0.869219	0.850147	0.913849	0.883353
0.95727	0.805767	0.871804	0.886726	0.943507	0.691963	0.828796	0.87719	0.719409	0.807498	0.913191	0.79774	0.677769	0.773717	0.880703	0.864115	0.894327	0.881119
0.940349	0.815571	0.880074	0.890424	0.942559	0.710916	0.833485	0.882898	0.688933	0.783197	0.913609	0.802793	0.679492	0.797824	0.854309	0.847598	0.889413	0.878855
0.94343	0.824297	0.892509	0.904593	0.934604	0.725652	0.83452	0.884768	0.681332	0.770549	0.928917	0.795234	0.649629	0.766543	0.869462	0.862699	0.901265	0.877451
0.949975	0.825272	0.909091	0.899975	0.929175	0.735415	0.842226	0.885317	0.708185	0.77551	0.918507	0.802772	0.756662	0.7857	0.854296	0.862521	0.89738	0.888666
0.946808	0.823963	0.872379	0.892051	0.922969	0.723921	0.844901	0.879096	0.705226	0.800642	0.926867	0.847115	0.770023	0.76037	0.860979	0.874276	0.894029	0.895394
0.954877	0.839292	0.870657	0.896841	0.920038	0.736259	0.85851	0.882618	0.819052	0.785576	0.923048	0.859819	0.912265	0.741052	0.857585	0.880967	0.844499	0.893916
0.951614	0.801162	0.84517	0.892995	0.920923	0.763049	0.860792	0.888526	0.823802	0.787787	0.923219	0.855456	0.909964	0.747711	0.861374	0.895131	0.813974	0.90606
0.947766	0.819485	0.863911	0.880177	0.912256	0.756863	0.856839	0.87147	0.832788	0.800408	0.927639	0.832826	0.873931	0.738826	0.836189	0.883462	0.789391	0.898707
0.952373	0.847381	0.870953	0.876223	0.908852	0.807928	0.855583	0.862292	0.811907	0.818602	0.9269	0.835888	0.850727	0.761341	0.823861	0.859876	0.723974	0.907215
0.953675	0.832924	0.870358	0.887626	0.899326	0.790225	0.865108	0.87352	0.86048	0.835221	0.92248	0.845955	0.837905	0.780077	0.800807	0.829829	0.796779	0.921695
0.94015	0.826497	0.853679	0.889065	0.907997	0.828927	0.863903	0.843337	0.871287	0.834721	0.916073	0.883107	0.83737	0.764176	0.783405	0.799637	0.825189	0.909206
0.94943	0.797429	0.850489	0.883018	0.920746	0.823639	0.860597	0.879129	0.869593	0.87068	0.915254	0.870855	0.866434	0.766351	0.805799	0.804269	0.762353	0.899473
0.958127	0.810046	0.85791	0.870044	0.921732	0.847631	0.855909	0.895788	0.877068	0.882012	0.921138	0.882546	0.873732	0.759127	0.801077	0.798713	0.717722	0.908973
0.961777	0.874464	0.853199	0.864038	0.921064	0.835408	0.851527	0.884545	0.88395	0.884805	0.916385	0.880074	0.85163	0.762605	0.815501	0.80163	0.735612	0.924496
0.950988	0.87851	0.823469	0.85197	0.915544	0.843619	0.85618	0.891463	0.870552	0.896444	0.941488	0.875935	0.789407	0.760116	0.832965	0.822488	0.771131	0.925938
0.940413	0.85258	0.828558	0.849391	0.91566	0.849356	0.84706	0.90802	0.880134	0.889933	0.934586	0.879027	0.790964	0.745363	0.82885	0.845089	0.819647	0.910978
0.933895	0.841758	0.834896	0.834128	0.905354	0.863006	0.845648	0.915222	0.875905	0.896808	0.946315	0.879148	0.798533	0.742318	0.859388	0.864606	0.813533	0.915894
0.954503	0.842835	0.849851	0.842873	0.902675	0.863561	0.847783	0.910727	0.874065	0.904503	0.942662	0.880746	0.817194	0.753874	0.844282	0.82458	0.84346	0.912278
0.958509	0.85224	0.864636	0.843516	0.901652	0.871855	0.828615	0.910208	0.890006	0.898659	0.943519	0.887585	0.803762	0.709733	0.838067	0.806985	0.815529	0.910622
0.953958	0.868986	0.862077	0.836461	0.904845	0.86175	0.824366	0.907458	0.880478	0.902942	0.941867	0.883976	0.79307	0.739265	0.841932	0.798312	0.815308	0.921346
0.950166	0.872379	0.846904	0.827888	0.910649	0.882899	0.817572	0.895445	0.874562	0.906277	0.937689	0.882393	0.792688	0.767792	0.870628	0.827162	0.819216	0.923118
0.951506	0.874371	0.863303	0.80317	0.90782	0.856113	0.829628	0.888035	0.872588	0.896808	0.93778	0.889422	0.814715	0.824314	0.874789	0.819253	0.792559	0.912424
0.957221	0.901752	0.875344	0.793512	0.893685	0.844619	0.827074	0.889055	0.876323	0.904891	0.935342	0.885719	0.81522	0.813968	0.86778	0.817105	0.718108	0.918533
0.953189	0.902388	0.87541	0.808936	0.900597	0.863963	0.820767	0.889136	0.882755	0.895051	0.926439	0.897829	0.78019	0.799448	0.864738	0.796665		0.918747
0.949931	0.912375	0.893141	0.795684	0.901278	0.854802	0.823918	0.90059	0.881214	0.899114	0.928825	0.900252	0.762351	0.810107	0.863283	0.789969		0.928817
0.941852	0.921966	0.890181	0.773395	0.915186	0.866007	0.819084	0.89828	0.880576	0.903255	0.930539	0.896345	0.787315	0.760946	0.866523	0.790607		0.915417
0.948218	0.922158	0.879021	0.786021	0.916841	0.873516	0.811735	0.877568	0.869249	0.905988	0.938724	0.897614	0.77729	0.740297	0.878367	0.758762		0.917563
0.949962	0.921642	0.884004	0.81267	0.91588	0.853616	0.799725	0.874297	0.890367	0.909261	0.929457	0.904628	0.774608	0.729703	0.858092	0.704313		0.905805
0.950191	0.914918	0.896947	0.792315	0.915729	0.849454	0.797943	0.882053	0.898344	0.915579	0.92563	0.893992	0.815201	0.779854	0.857964	0.717148		0.899318
0.95223	0.91904	0.897696	0.793634	0.913041	0.859168	0.791837	0.87025	0.9047	0.910643	0.946	0.904182	0.83079	0.768316	0.861021	0.782742		0.885325
0.953993	0.92371	0.894655	0.811487	0.912431	0.853418	0.808861	0.870964	0.911708	0.898328	0.934299	0.900016	0.819697	0.721032	0.843498	0.850128		0.876863
0.959192	0.921718	0.908896	0.79697	0.925335	0.848722	0.820981	0.875483	0.898995	0.893433	0.931185	0.906598	0.883873	0.70419	0.828185	0.884512		0.890524
0.963013	0.925792	0.916373	0.771061	0.928766	0.838856	0.828933	0.859669	0.907368	0.893502	0.926309	0.907405	0.871723	0.67885	0.827247	0.892222		0.879804
0.962651	0.925523	0.914255	0.785635	0.928153	0.82356	0.848849	0.901624	0.92707	0.887648	0.930592	0.908709	0.868009	0.704297	0.804414	0.893233		0.877406
0.957656	0.931275	0.917415	0.806071	0.925924	0.823003	0.858128	0.880207	0.926059	0.886048	0.926457	0.923596	0.868187	0.703535	0.781845	0.888168		0.885139
0.961266	0.937058	0.92105	0.809442	0.919401	0.827872	0.86211	0.903935	0.90985	0.895614	0.912845	0.921731	0.861671	0.885325	0.752186	0.893046		0.87387
0.958597	0.937582	0.925973	0.816341	0.914556	0.864537	0.865158	0.896364	0.899288	0.896024	0.9361	0.918776	0.878361	0.876863	0.724329	0.885104		0.891713
0.958913	0.937258	0.911382	0.80172	0.918215	0.840901	0.86069	0.883184	0.910501	0.890998	0.918697	0.919185	0.865924	0.890524	0.712947	0.874573		0.88774
0.962621	0.945595	0.905419	0.78035	0.904223	0.851101	0.857638	0.892973	0.901703	0.903179	0.909033	0.914344	0.814656	0.879804	0.726204	0.859086		0.895258
0.969485	0.954727	0.905554	0.787382	0.914415	0.840313	0.874307	0.918881	0.914838	0.910204	0.901399	0.907584		0.877406	0.706389	0.879457		0.881713
0.967404	0.946636	0.891541	0.77436	0.920066	0.82984	0.874883	0.909984	0.899563	0.915498	0.914722	0.912066		0.885139	0.716387	0.853732		0.890198
0.970736	0.953041	0.894511	0.758776	0.926955	0.8397	0.881722	0.888097	0.919301	0.918813	0.903769	0.907374		0.87387	0.646095	0.801521		0.895601
0.968302	0.955441	0.882346	0.734351	0.924973	0.818506	0.885662	0.882485	0.924699	0.900106	0.898833	0.908946		0.891713	0.689261	0.750527		0.897011
0.970717	0.951032	0.894459	0.743116	0.931333	0.812688	0.872406	0.875341	0.920824	0.904629	0.892085	0.893988		0.88774	0.697881	0.734411		0.893335
0.964826	0.953324	0.907009	0.748054	0.923823	0.799426	0.872234	0.848991	0.905901	0.906347	0.897147	0.891129			0.718555	0.774079		0.876317
0.959886	0.950333	0.909887	0.762676	0.932609	0.784279	0.869861	0.861204	0.90425	0.909886	0.894396	0.881874			0.698924	0.788329		0.876683
0.953198	0.95365	0.911197	0.768379	0.926671	0.77962	0.867353	0.858531	0.909653	0.91961	0.898797	0.898806			0.732211	0.799274		0.87788
0.961204	0.950693	0.902987	0.758175	0.922336	0.809361	0.862029	0.86549	0.90984	0.921134	0.892259	0.890711				0.795052		0.872644
0.96252	0.95531	0.906032	0.662617	0.932479	0.799056	0.86498	0.884725	0.907001	0.929555	0.87474	0.90466				0.838143		0.884387
0.960143	0.953791	0.92273	0.724881	0.93987	0.812846	0.864877	0.875252	0.916122	0.929971	0.846742	0.904717				0.838051		0.884745
0.957185	0.951267	0.915708	0.708836	0.937842	0.801504	0.869024	0.864793	0.914489	0.923884	0.841975	0.907496				0.873262		0.878921
0.957075	0.953167	0.893911	0.703475	0.940994	0.751551	0.868327	0.870574	0.90797	0.925827	0.829811	0.90942				0.84179		0.885149
0.959202	0.95623	0.906531	0.76119	0.939219	0.750035	0.873344	0.871284	0.882445	0.930547	0.85425	0.906133				0.88287		0.886674
0.958555	0.9574	0.916104	0.778285	0.931751	0.727503	0.864836	0.877392	0.909407	0.931766	0.855063	0.909756				0.87653		0.8985
0.954322	0.957873	0.899579	0.788488	0.922283	0.755013	0.875085	0.872185	0.879533	0.92844	0.831897	0.912951				0.864536		0.883873
0.958096	0.954169	0.900815	0.781457	0.918771	0.739815	0.873551	0.887885	0.875275	0.928032	0.833635	0.922755				0.859822		0.871723
0.960357	0.959799	0.91437	0.787968	0.927896	0.715828	0.877704	0.886757	0.89356	0.937577	0.809697	0.91828				0.854593		0.868009
0.962664	0.959986	0.909595	0.814328	0.924067	0.72011	0.887186	0.878848	0.827181	0.941952	0.808247	0.917328						0.868187
0.963871	0.960107	0.886739	0.755433	0.929271	0.693458	0.892082	0.837133	0.857187	0.938903	0.830704	0.913421						0.861671
0.964539	0.959921	0.903719	0.764634	0.929678	0.680301	0.899656	0.874704	0.849873	0.942321	0.825872	0.913679						0.878361
0.960214	0.959901	0.906576	0.746297	0.922793	0.709727	0.895268	0.846653	0.883319	0.934434	0.81001	0.914916						0.865924
0.959819	0.960323	0.909593	0.76403	0.928408	0.689811	0.896062	0.858945	0.887692	0.934949	0.809802	0.911359						0.814656
0.962073	0.960788	0.907552	0.73468	0.927118	0.72795	0.885834	0.85472	0.895437	0.941361	0.809507	0.910729						0.693996
0.962943	0.96068	0.899932	0.758161	0.920797	0.754111	0.873833	0.76685	0.897601	0.932607	0.836219	0.903333						0.766054
0.965035	0.961463	0.883718	0.664353	0.928194	0.770999	0.880591	0.788008	0.917305	0.936098	0.835918	0.903814						0.829207
0.963007	0.960986	0.901232	0.718295	0.923745	0.717955	0.874505	0.79593	0.893781	0.928981	0.845043	0.897148						0.812421
0.964858	0.960587	0.911172		0.93652	0.763489	0.868194	0.819615	0.893921	0.935321	0.889424	0.901865						0.839837
0.963113	0.96419	0.904647		0.929115	0.756854	0.860461	0.825595	0.866062	0.936069	0.895473	0.906354						0.817599
0.96315	0.965105	0.882515		0.933117	0.734472	0.858581	0.839501	0.88668	0.932632	0.895652	0.901173						0.81671
0.964011	0.963804	0.890517		0.936507	0.774663	0.879874	0.830114	0.88733	0.940754	0.891709	0.896223						0.817557
0.959095	0.963866	0.885322		0.938076	0.798634	0.870904	0.845763	0.870239	0.942766	0.872841	0.896684						0.862341
0.965623	0.967828	0.890533		0.931875	0.788561	0.875928	0.816136	0.85721	0.938711	0.870627	0.90444
0.967528	0.970219	0.871611		0.937169	0.79479	0.884442	0.819658	0.876302	0.943427	0.869791	0.891493
0.968289	0.971477	0.86869		0.932689	0.804493	0.884535		0.864442	0.949648	0.854129	0.883208
0.967035	0.96769	0.84718		0.938329	0.800129	0.906259		0.886066	0.944248	0.808714	0.880219
0.966968	0.968032	0.838182		0.934645	0.76932	0.915961		0.891377	0.946326	0.687736	0.87992
0.969569	0.967816	0.808673		0.924877	0.786974	0.914942		0.871524	0.930887	0.723577	0.883771
0.970658	0.970055	0.800564		0.927547	0.809237	0.914321		0.877866	0.933723	0.749404	0.891304
0.969063	0.971102	0.867576		0.924953	0.830457	0.912388		0.883447	0.933732	0.723796	0.896959
0.96956	0.970645	0.865903		0.931427	0.812449	0.914216		0.888211	0.933765	0.715541	0.899383
0.967609	0.969207	0.866194		0.924438	0.721393	0.904843		0.879094	0.911015	0.738864	0.899541
0.969268	0.966411	0.860954		0.913968	0.746852	0.902897		0.900225	0.880557	0.742739	0.895044
0.972733	0.967967	0.884326		0.920992	0.757835	0.898309		0.91487	0.876595	0.743038	0.899164
0.970713	0.969023	0.881125		0.918378	0.807114	0.890355		0.911662	0.843458	0.739456	0.900353
0.971609	0.966458	0.858312		0.922419	0.789364	0.897561		0.912116	0.821306	0.790312	0.898671
0.970608	0.972482	0.823307		0.931927	0.785816	0.9099		0.923233	0.801886		0.905238
0.968203	0.968852	0.862185		0.934204	0.807752	0.91287		0.909699	0.783195		0.900766
0.97106	0.969338	0.835491		0.928621	0.809102	0.90382		0.911136	0.787244		0.901624
0.971348	0.965621	0.82914		0.928698	0.769939	0.916048		0.911485	0.678753		0.914649
0.976095	0.960834	0.847133		0.932385	0.789151	0.928582		0.89362	0.68332		0.865985
0.974529	0.962522	0.833899		0.943456	0.777081	0.920262		0.908064	0.791226		0.902436
0.971484	0.95957	0.83634		0.939679	0.749229	0.914567		0.90776	0.805608		0.860081
0.97238	0.960255	0.807111		0.938152	0.741757	0.912308		0.925584	0.854501		0.822034
0.973189	0.959324	0.808599		0.941507	0.731026	0.911733		0.93825	0.874429		0.798807
0.972729	0.963877	0.784138		0.944142	0.676454	0.916667		0.930762	0.902662		0.761012
0.972816	0.967019	0.816881		0.945849	0.6573	0.919805		0.931383	0.907195		0.818393
0.973201	0.963349	0.83499		0.94328	0.762932	0.909758		0.916389	0.917349		0.82442
0.97451	0.969864	0.815444		0.944767	0.778926	0.906245		0.918156	0.916481		0.822769
0.9712	0.97201	0.819913		0.945042	0.835106	0.906275		0.909838	0.930832		0.828828
0.973903	0.967776	0.842354		0.940031	0.83008	0.906317		0.922604			0.847938
0.969694	0.965112	0.847041		0.938828	0.805292	0.89674		0.917416			0.873299
0.973626	0.968319	0.821628		0.944275	0.806315	0.893868		0.910696			0.876311
0.974878	0.969111	0.845452		0.940842	0.866749	0.899437		0.917865			0.868726
0.973549	0.967661	0.846579		0.933396	0.865448	0.894818		0.9134			0.882607
0.973959	0.963315	0.834469		0.931945	0.81496	0.884723		0.921928
0.975004	0.959391	0.851098		0.933937	0.7941	0.879959		0.929837
0.976649	0.953263	0.82561		0.935051	0.838607	0.889733		0.944734
0.975963	0.963239	0.824541		0.934257	0.792178	0.880763		0.94573
0.972986	0.956508	0.834431		0.944124	0.762231	0.862572		0.93097
0.973739	0.943643	0.852745		0.940003	0.727866	0.868444		0.932513
0.971571	0.934889	0.832381		0.93874		0.87845		0.910854
0.975013	0.935886	0.846118		0.942388		0.861791		0.881989
0.972781	0.917077	0.808483		0.941801		0.862765		0.878564
0.970254	0.935351	0.808243		0.943374		0.852739		0.871471
0.971774	0.931505	0.860606		0.947067		0.858081
0.973421	0.937047	0.865998		0.942664		0.885101
0.969836	0.942242	0.85903		0.943556		0.864976
0.971926	0.941473	0.891169		0.942188		0.87758
0.972866	0.939831	0.8622		0.938895		0.876989
0.970206	0.938121	0.866763		0.924443		0.878343
0.972005	0.937231	0.843719		0.934058		0.871605
0.971989	0.934242	0.839531		0.935867		0.873661
0.970134	0.936944	0.868562		0.926096		0.87953
0.970587	0.934384	0.84539		0.93512		0.882177
0.968374	0.93741	0.836086		0.935769		0.86934
0.968321	0.939538	0.829443		0.939203		0.867274
0.966503	0.933064	0.819901		0.933857		0.862842
0.967242	0.932145	0.812291		0.933604		0.863993
0.967125	0.93094	0.838175		0.92923		0.867186
0.970215	0.934853	0.831921		0.934523		0.868173
0.969436	0.92612	0.838685		0.929066		0.869968
0.968759	0.92817	0.824944		0.923179		0.863274
0.968317	0.926627	0.83577		0.913616		0.867516
0.968821	0.931862	0.810984		0.891428		0.903411
0.966477	0.93027	0.830012		0.862082		0.899208
0.967561	0.925078	0.845366		0.871932		0.876268
0.965144	0.922035	0.869926		0.885247		0.866559
0.966899	0.918393	0.879973		0.886746		0.885925
0.964662	0.912414	0.886571		0.87854		0.885585
0.965372	0.911781	0.901927		0.865102		0.891624
0.967091	0.921985	0.900273		0.872392		0.874508
0.965643	0.914303	0.883701		0.875324		0.883155
0.963246	0.911033	0.864949		0.883655		0.90081
0.964339	0.923403	0.887889		0.902023		0.916037
0.968061	0.916108	0.872262		0.897209		0.91302
0.966359	0.914768	0.862448		0.89491		0.905421
0.963557	0.916246	0.847841		0.888517		0.896288
0.964727	0.916662	0.839305		0.882402		0.895615
0.964083	0.916805	0.838411		0.879963		0.895294
0.966189	0.924573	0.860082		0.886769		0.917135
0.964213	0.921341	0.894431		0.879924		0.922057
0.965451	0.916851	0.862881		0.877461		0.925591
0.959067	0.912818	0.824885		0.87631		0.929858
0.964405	0.91115	0.830401		0.874334		0.913765
0.968327	0.909877	0.806008		0.865113		0.913606
0.966494	0.903783	0.807958		0.871283		0.922262
0.969048	0.910417	0.784374		0.862705		0.932338
0.970159	0.899355	0.801641		0.868087		0.925933
0.966342	0.894914	0.803332		0.878056		0.923879
0.966781	0.887704	0.830514		0.887224		0.92078
0.967164	0.891835	0.839872		0.880767		0.907361
0.963129	0.893757	0.8695		0.87525		0.910672
0.964271	0.88287	0.902218		0.875609		0.910748
0.962091	0.877039	0.896464		0.891307		0.909157
0.965377	0.866582	0.889824		0.869688		0.904194
0.963976	0.883029	0.896532		0.86169		0.915523
0.962229	0.876098	0.874637		0.864731		0.905691
0.964437	0.878327	0.890491		0.870792		0.921093
0.964893	0.893091	0.909738		0.863102		0.918544
0.965306	0.898304	0.891618		0.862124		0.899646
0.963039	0.912917	0.912798		0.849144		0.921627
0.961174	0.929628	0.925547		0.798593		0.90786
0.961098	0.932068	0.927858		0.807806		0.896596
0.960623	0.938168	0.938547		0.807102		0.899517
0.963932	0.956508	0.933107		0.80904		0.907203
0.966419	0.960033	0.943209		0.787912		0.904417
0.969912	0.958354	0.932004		0.779578		0.909244
0.966414	0.963457	0.926461		0.771922		0.914186
0.968605	0.970441	0.926387		0.759747		0.909951
0.970534	0.967491	0.912988		0.76932		0.914836
0.970161	0.969939	0.926518		0.797357		0.922049
0.969964	0.971265	0.911025		0.783556		0.921879
0.968754	0.970774	0.930586		0.785017
0.968501	0.966849	0.921754		0.781415
0.968628	0.969574	0.920902		0.758355
0.97073	0.961362	0.927857		0.798997
0.966942	0.965057	0.914595
0.966518	0.964295	0.907951
0.969132	0.962219	0.907163
0.970479	0.966108	0.917751
0.970362	0.963903	0.918095
0.96979	0.962545	0.924215
0.963781	0.967578	0.92057
0.963896	0.966864	0.912119
0.962898	0.9658	0.909135
0.962399	0.967075	0.900623
0.963311	0.966938	0.863823
0.962385	0.966321	0.885057
0.957086	0.961853	0.862527
0.958364	0.963348	0.83864
0.962822	0.962853	0.852987
0.960773	0.960988	0.852345
0.965549	0.959896	0.849527
0.966244	0.965122	0.769184
0.964206	0.958512	0.732934
0.966936	0.956392	0.724975
0.960262	0.956514	0.807652
0.963649	0.961668	0.72878
0.966303	0.9586	0.772967
0.965	0.956752	0.852618
0.968777	0.954251	0.911408
0.966977	0.959619	0.901575
0.965189	0.962565	0.907745
0.96832	0.958243	0.911755
0.969371	0.956426	0.909491
0.971672	0.956583	0.919825
0.971455	0.949685	0.895067
0.970689	0.941903	0.889836
0.972376	0.937801	0.918508
0.966988	0.945478	0.903937
0.968219	0.937569	0.915889
0.965508	0.935015
0.967581	0.933178
0.964097	0.937147
0.960893	0.94378
0.960444	0.942501
0.958316	0.937561
0.957787	0.943083
0.958729	0.943695
0.955523	0.940812
0.952544	0.940086
0.953839	0.930873
0.950718	0.935267
0.948741	0.930291
0.952639	0.927944
0.951072	0.928709
0.945194	0.939772
0.948447	0.927725
0.945442	0.911664
0.94384	0.893437
0.947085	0.890159
0.94633	0.840212
0.949598	0.795705
0.950083	0.781018
0.94921	0.782609
0.946695	0.798975
0.951865	0.781839
0.952042	0.741754
0.952331	0.802116
0.953212
0.948943
0.944432
0.949271
0.935611
0.936403
0.946261
0.948221
0.952694
0.960514
0.961424
0.96634

## Sheet: SI11_b
Isocortex	HPF	OLF	CTXsp	STR	PAL	DORsm	DORpm	HY	MBmot
0.955225	0.780328	0.796785	0.744556	0.781209	0.802401	0.758336	0.886902	0.81764	0.721926
0.954114	0.755591	0.692177	0.699497	0.782211	0.817239	0.782949	0.875267	0.857355	0.704734
0.954271	0.790827	0.749183	0.68557	0.7661	0.771416	0.828257	0.880413	0.820799	0.615426
0.953072	0.775908	0.821138	0.724298	0.765158	0.761439	0.817724	0.868845	0.768324	0.618845
0.949258	0.755925	0.893955	0.692446	0.784151	0.7842	0.816432	0.868205	0.771854	0.632653
0.944515	0.8471	0.900127	0.694852	0.779927	0.829772	0.799753	0.862929	0.809126	0.655704
0.938579	0.863165	0.875556	0.703433	0.793503	0.805156	0.840883	0.891328	0.857858	0.661607
0.940387	0.872945	0.914139	0.702455	0.76479	0.791013	0.814218	0.885651	0.886279	0.683074
0.945181	0.861134	0.922207	0.681081	0.826841	0.854694	0.82437	0.90689	0.888603	0.680272
0.947106	0.867513	0.898342	0.707492	0.840181	0.816737	0.868365	0.89014	0.887562	0.655766
0.943576	0.895161	0.862322	0.738131	0.869935	0.76044	0.844801	0.897744	0.896723	0.715408
0.94921	0.914332	0.874331	0.743647	0.892574	0.716239	0.810984	0.884693	0.89498	0.694378
0.955002	0.902075	0.901661	0.701104	0.889504	0.666581	0.825095	0.886709	0.901437	0.750521
0.958522	0.916232	0.901731	0.756217	0.91036	0.719837	0.830811	0.878107	0.917231	0.724477
0.960318	0.919868	0.901261	0.75737	0.904413	0.654507	0.844269	0.832787	0.91054	0.76968
0.962294	0.92549	0.928478	0.754497	0.900683	0.723967	0.848807	0.827247	0.918087	0.806599
0.964822	0.923237	0.924385	0.712474	0.911217	0.721624	0.852104	0.794364	0.921332	0.799684
0.967375	0.925958	0.916198	0.663288	0.901337	0.721331	0.833412	0.811966	0.926466	0.784883
0.97148	0.929454	0.923225	0.763122	0.896614	0.735836	0.843314	0.84357	0.934343	0.812532
0.97183	0.92394	0.912299	0.796499	0.899926	0.753016	0.849167	0.891951	0.927977	0.796061
0.970659	0.933522	0.895752	0.789011	0.898888	0.731804	0.862295	0.91235	0.925398	0.791572
0.974428	0.91573	0.91188	0.81441	0.887568	0.711026	0.847206	0.92022	0.920879	0.807296
0.971833	0.921707	0.912301	0.822773	0.900379	0.70883	0.852146	0.918747	0.902216	0.795347
0.969975	0.929987	0.903301	0.830406	0.891717	0.699687	0.852371	0.886286	0.919306	0.81555
0.976187	0.923919	0.923827	0.798182	0.896143	0.698621	0.843664	0.87204	0.908205	0.815002
0.975481	0.927916	0.924582	0.843499	0.900524	0.699468	0.82682	0.89323	0.910846	0.802165
0.975384	0.923093	0.921789	0.856384	0.895354	0.615299	0.81039	0.885277	0.909697	0.812899
0.973343	0.933219	0.918387	0.839578	0.903155	0.632147	0.814481	0.901227	0.911103	0.790597
0.975072	0.921591	0.935325	0.857237	0.896771	0.671209	0.804173	0.891174	0.917602	0.836996
0.974024	0.926714	0.918168	0.862184	0.89847	0.730857	0.828521	0.895407	0.92026	0.814741
0.975085	0.928873	0.926055	0.846647	0.903715	0.685031	0.832185	0.894361	0.933001	0.857697
0.972897	0.927342	0.926398	0.836272	0.894865	0.709974	0.830773	0.879898	0.919587	0.841832
0.977871	0.924771	0.930293	0.854113	0.906658	0.697178	0.844884	0.882313	0.924321	0.816967
0.973755	0.931706	0.927066	0.829263	0.90535	0.692964	0.860021	0.873199	0.934166	0.86106
0.972687	0.931812	0.927538	0.835707	0.909284	0.68486	0.870094	0.856877	0.921345	0.876008
0.96431	0.9279	0.879945	0.82715	0.915768	0.759591	0.86939	0.858643	0.923388	0.87941
0.966895	0.931169	0.879263	0.852844	0.905753	0.729457	0.865184	0.865877	0.913205	0.865403
0.964725	0.929546	0.866634	0.838806	0.907811	0.725083	0.845172	0.863633	0.912236	0.835086
0.966448	0.924727	0.87406	0.862325	0.907678	0.762245	0.842872	0.867835	0.92609	0.791815
0.966821	0.926559	0.863237	0.838874	0.902608	0.737364	0.864448	0.859438	0.906302	0.791007
0.971194	0.929108	0.8816	0.860414	0.904354	0.735477	0.842265	0.877713	0.907072	0.833745
0.970927	0.938117	0.885208	0.871122	0.877736	0.730289	0.819221	0.88278	0.904435	0.747919
0.970979	0.941595	0.889562	0.88022	0.864318	0.740063	0.841755	0.867714	0.901171	0.757295
0.974015	0.940789	0.904396	0.891178	0.865111	0.772217	0.844287	0.894412	0.894856	0.781928
0.960522	0.938274	0.862679	0.880357	0.887644	0.751202	0.826567	0.883843	0.893939	0.76696
0.961976	0.941197	0.864033	0.889474	0.889259	0.731944	0.854547	0.877378	0.891202	0.731701
0.962489	0.941846	0.867287	0.902977	0.872441	0.716605	0.891563	0.857614	0.881219	0.725314
0.959699	0.946438	0.84451	0.901194	0.87276	0.715616	0.882671	0.860646	0.87636	0.766633
0.962643	0.949531	0.846058	0.897015	0.862655	0.725212	0.879471	0.889983	0.877039	0.727562
0.963128	0.94909	0.832812	0.898134	0.877368	0.743075	0.872939	0.884384	0.867915	0.672694
0.962463	0.948224	0.818677	0.898767	0.880825	0.748483	0.870327	0.885241	0.86665	0.713096
0.963982	0.951185	0.823437	0.888051	0.906877	0.784724	0.85799	0.896774	0.860132	0.671431
0.964739	0.955208	0.829019	0.891178	0.908271	0.772791	0.846744	0.897265	0.843849	0.66936
0.966246	0.957717	0.833352	0.890206	0.919021	0.79668	0.891304	0.898144	0.843935	0.683256
0.962546	0.95567	0.795163	0.879758	0.918298	0.7832	0.890272	0.86545	0.86128	0.731946
0.965411	0.959734	0.849105	0.891034	0.912636	0.806991	0.900969	0.869839	0.869094	0.745556
0.965763	0.9645	0.851166	0.896538	0.910129	0.848033	0.919034	0.878651	0.857006	0.783517
0.959643	0.965977	0.806151	0.876093	0.935091	0.828088	0.903554	0.897366	0.86716	0.790828
0.967001	0.970091	0.8603	0.867888	0.939253	0.846844	0.909902	0.908718	0.872571	0.817138
0.969747	0.970461	0.870639	0.88568	0.932918	0.840899	0.923062	0.9073	0.864807	0.817236
0.967188	0.967426	0.869438	0.874936	0.931914	0.813974	0.896968	0.897311	0.869499	0.824869
0.96842	0.968829	0.886784	0.887455	0.930669	0.833361	0.888726	0.892301	0.885336	0.816857
0.972228	0.969382	0.89866	0.89692	0.928525	0.872283	0.836034	0.901138	0.873758	0.835319
0.969765	0.965912	0.895746	0.909656	0.93	0.882497	0.872588	0.89828	0.870931	0.833209
0.968623	0.960381	0.882089	0.910188	0.934897	0.890503	0.868804	0.876931	0.896425	0.857641
0.969039	0.95874	0.904626	0.908929	0.934622	0.883309	0.853333	0.90107	0.899664	0.849632
0.970117	0.955088	0.880557	0.90098	0.938834	0.902159	0.852382	0.891793	0.889903	0.875
0.966669	0.946202	0.869846	0.891027	0.94066	0.903819	0.866986	0.897052	0.887674	0.875769
0.965816	0.935891	0.862571	0.900254	0.945178	0.901047	0.863547	0.880107	0.890638	0.875651
0.968959	0.928533	0.873872	0.89134	0.941411	0.909028	0.863681	0.879295	0.907245	0.892426
0.971495	0.912962	0.878397	0.887945	0.936646	0.89596	0.8608	0.891023	0.90203	0.888396
0.973102	0.908063	0.884302	0.895226	0.932679	0.886184	0.874355	0.854873	0.901465	0.86757
0.974502	0.902481	0.892763	0.899943	0.929852	0.915098	0.857871	0.887406	0.885007	0.879349
0.98042	0.905565	0.90758	0.893674	0.922899	0.900155	0.853714	0.882358	0.871651	0.850374
0.977951	0.898063	0.879376	0.910551	0.928865	0.884045	0.818901	0.893547	0.860968	0.845378
0.976285	0.904034	0.86019	0.885353	0.934279	0.874163	0.845378	0.872964	0.836964	0.843888
0.978041	0.900134	0.851883	0.86669	0.932353	0.850486	0.843888	0.893836	0.831931	0.866347
0.977444	0.895758	0.846275	0.867034	0.93844	0.860585	0.866347	0.890949	0.841035	0.859432
0.975726	0.902426	0.840878	0.868887	0.925477	0.875969	0.859432	0.892666	0.823031	0.852285
0.97613	0.902146	0.839228	0.86299	0.92622	0.878291	0.852285	0.892475	0.795322	0.861718
0.972926	0.90245	0.825389	0.850447	0.934608	0.866633	0.861718	0.867915	0.783712	0.865506
0.968107	0.909068	0.82588	0.807833	0.937212	0.852898	0.865506	0.8744	0.780303	0.86979
0.970761	0.908274	0.845194	0.809106	0.945744	0.845136	0.86979	0.882392	0.810089	0.866572
0.973443	0.90278	0.852556	0.77302	0.944989	0.849901	0.866572	0.844037	0.827401
0.976544	0.902511	0.859773	0.778965	0.948513	0.847805	0.847475	0.836387	0.799557
0.979832	0.902104	0.857537	0.787602	0.939638	0.83964	0.834579	0.856553	0.814682
0.977959	0.902831	0.867796	0.745107	0.930763	0.845352	0.818019	0.845631	0.843836
0.976647	0.902308	0.860517	0.728941	0.924467	0.836302	0.824881	0.819767	0.820345
0.971899	0.913491	0.858236	0.724959	0.936753	0.837443	0.798774	0.80903	0.850519
0.972389	0.904929	0.864084	0.771572	0.939582	0.837848	0.79839	0.851228	0.827328
0.976474	0.909718	0.870833	0.781873	0.941164	0.837044	0.792165	0.825682	0.813521
0.973702	0.911588	0.864118	0.77819	0.938393	0.813049	0.818783	0.794597	0.838602
0.970566	0.913918	0.860707	0.734807	0.942212	0.815332	0.834578	0.819142	0.80977
0.97348	0.911397	0.844962	0.733542	0.939007	0.805679	0.779653	0.805809	0.798094
0.975969	0.912576	0.841676		0.936083	0.775194		0.803282	0.823723
0.97045	0.90813	0.823284		0.935598	0.809932		0.809533	0.804952
0.971618	0.909164	0.838574		0.932709	0.799855		0.832207	0.815721
0.970357	0.90838	0.837619		0.934725	0.848075		0.815137	0.806988
0.969545	0.910067	0.817853		0.939334	0.839837		0.837551	0.781542
0.969482	0.903048	0.823301		0.939211	0.887456		0.863244	0.832856
0.969702	0.909152	0.807356		0.932448	0.826923		0.860499	0.86104
0.966906	0.908384	0.767903		0.930585	0.744556		0.857731	0.848878
0.966575	0.919594	0.756022		0.911998	0.699497		0.850387	0.846177
0.96768	0.918667	0.794487		0.914276	0.68557		0.837779	0.801403
0.969107	0.919317	0.765023		0.917056	0.724298		0.83097	0.862553
0.966245	0.917081	0.745601		0.926739	0.692446		0.76537	0.841055
0.968383	0.925303	0.776644		0.916145	0.694852		0.786598	0.83957
0.966093	0.921791	0.757965		0.910884	0.703433		0.760729	0.818718
0.9661	0.933609	0.711882		0.910195	0.702455		0.689684	0.810849
0.96814	0.941075	0.739578		0.907853	0.681081		0.70003	0.79808
0.969353	0.939237	0.739325		0.907875	0.707492		0.686152	0.781627
0.969966	0.937779	0.728175		0.903805	0.738131		0.663275
0.967809	0.933097	0.66518		0.906437	0.731151		0.660745
0.967599	0.947143	0.709709		0.912398	0.774908		0.667243
0.968528	0.945948	0.736626		0.912802	0.762257		0.659875
0.969306	0.951471	0.685038		0.907809	0.744981		0.684069
0.971821	0.946731	0.686962		0.907373	0.759486		0.674985
0.970249	0.94787	0.664818		0.907917	0.754849		0.661626
0.971988	0.94486	0.653214		0.912524	0.732646		0.714805
0.970601	0.948881	0.725405		0.920831	0.719836		0.668515
0.975528	0.956389	0.739726		0.910217	0.759044		0.707451
0.976255	0.955626	0.710296		0.919673	0.694353		0.748071
0.975271	0.943911	0.723976		0.926719	0.705014		0.799122
0.971154	0.945249	0.774495		0.927188	0.787359		0.786794
0.971052	0.946883	0.778794		0.921247	0.785887		0.791202
0.974435	0.95471	0.825466		0.924971			0.768984
0.970383	0.947308	0.798809		0.926825			0.7809
0.970755	0.940328	0.813367		0.931577			0.849074
0.972871	0.936872	0.857767		0.914661			0.84822
0.972853	0.950928	0.852262		0.930363			0.848635
0.970322	0.939541	0.828654		0.930206			0.854212
0.972324	0.937519	0.82444		0.931652			0.813682
0.97173	0.954474	0.863144		0.912865			0.741851
0.973265	0.967687	0.883489		0.888639
0.971983	0.965365	0.877671		0.917721
0.972002	0.968526	0.897302		0.926107
0.97324	0.962139	0.90276		0.923627
0.974674	0.964551	0.892053		0.927732
0.975286	0.965232	0.880288		0.924895
0.973735	0.96823	0.842432		0.930729
0.969992	0.964566	0.900227		0.927003
0.9728	0.958556	0.928059		0.92697
0.97405	0.962933	0.909367		0.928718
0.978395	0.96846	0.926376		0.924452
0.975456	0.965493	0.929141		0.936344
0.977556	0.970042	0.934712		0.933951
0.973837	0.966503	0.927425		0.933897
0.977088	0.969599	0.923126		0.923241
0.976033	0.973117	0.933012		0.924742
0.979617	0.965329	0.934561		0.935267
0.979068	0.970793	0.93073		0.93685
0.979962	0.972673	0.933597		0.930173
0.974753	0.968299	0.925563		0.925529
0.979196	0.973204	0.921658		0.920892
0.977474	0.969898	0.925291		0.916105
0.979114	0.971867	0.924341		0.9214
0.979839	0.975059	0.920236		0.927494
0.980959	0.966825	0.909114		0.930609
0.976727	0.96039	0.930954		0.927074
0.979206	0.955411	0.920815		0.92325
0.978152	0.952082	0.935646		0.918494
0.977191	0.953721	0.928074		0.928819
0.918667	0.956887	0.930976		0.929646
0.919317	0.960514	0.924976		0.936711
0.917081	0.959189	0.931398		0.928617
0.925303	0.962197	0.931638		0.927711
0.921791	0.968524	0.923086		0.926703
0.933609	0.969179	0.930118		0.922139
0.941075	0.966263	0.941475		0.913299
0.939237	0.969459	0.938517		0.918429
0.937779	0.966266	0.935003		0.916093
0.933097	0.969109	0.931931		0.918879
0.970388	0.967416	0.92918		0.935936
0.968818	0.965325	0.928301		0.924734
0.970614	0.967475	0.932981		0.912308
0.974435	0.964236	0.934424		0.935602
0.973197	0.96096	0.92111		0.932923
0.973551	0.96084	0.929322		0.931286
0.975386	0.962402	0.928009		0.931009
0.972992	0.966127	0.92378		0.936387
0.975242	0.964491	0.924765		0.937644
0.977053	0.962862	0.925249		0.939582
0.973878	0.965075	0.915543		0.944742
0.972727	0.963097	0.925907		0.947076
0.972008	0.962525	0.919901		0.945408
0.975121	0.95821	0.928962		0.938898
0.978126	0.961781	0.931275		0.950101
0.97501	0.956786	0.931773		0.943683
0.97442	0.950545	0.925168		0.946381
0.971326	0.954972	0.920865		0.938229
0.971877	0.950305	0.923403		0.940485
0.976674	0.946806	0.936099		0.926341
0.975389	0.93974	0.922728		0.914311
0.973903	0.938641	0.931821		0.930062
0.977448	0.935209	0.930777		0.920393
0.975055	0.930439	0.927839		0.92071
0.974203	0.93667	0.9381		0.915946
0.969395	0.932739	0.926001		0.904437
0.972746	0.936891	0.929668		0.902756
0.971545	0.948264	0.918486		0.892411
0.965988	0.948353	0.921315		0.86982
0.968795	0.949495	0.921218		0.863252
0.972155	0.950114	0.928408		0.810826
0.962781	0.936513	0.911395		0.8184
0.964869	0.930559	0.932517		0.797656
0.965346	0.927083	0.937776
0.96273	0.931088	0.951583
0.962842	0.926372	0.94545
0.964464	0.933264	0.93031
0.965846	0.943621	0.911721
0.961833	0.915765	0.908336
0.968511	0.9111	0.915736
0.967314	0.912299	0.920696
0.971319	0.90453	0.92747
0.973596	0.883599	0.932163
0.970692	0.870878	0.93994
0.967291	0.883119	0.924953
0.963921	0.903658	0.92584
0.963394	0.888932	0.930238
0.953743	0.848389	0.913914
0.96394	0.850462	0.924737
0.964059	0.859515	0.920276
0.953115	0.854625	0.89088
0.954826	0.867372	0.901828
0.956637	0.857091	0.895779
0.95437	0.863176	0.894453
0.955867	0.870345	0.879356
0.950984	0.852055	0.845935
0.954806	0.891851	0.830889
0.959773	0.859569	0.839707
0.961771	0.852795	0.833049
0.95585	0.862296	0.835954
0.955463	0.852384	0.858293
0.955851	0.864077	0.860223
0.952822	0.875712	0.834763
0.959236	0.84811	0.862325
0.955657	0.882938	0.808588
0.962418	0.800488	0.790274
0.965078	0.899686	0.803233
0.964283	0.922259	0.750687
0.972106	0.914691	0.794779
0.964923	0.867729	0.778729
0.967014	0.858512	0.712528
0.97049	0.831115	0.681283
0.967189	0.79458
0.968951	0.805434
0.970659	0.808029
0.956516	0.809827
0.972115	0.767375
0.961576
0.97277
0.977565
0.977489
0.966886
0.961172
0.957311
0.947951
0.945261
0.946098
0.948306
0.949356
0.922218
0.883953
0.836164
0.812481
0.793676
0.807351

## Sheet: SI11_c
Isocortex	HPF	STR	PAL	DORsm	DORpm	HY
0.982234	0.888269	0.878843	0.707324	0.825094	0.841542	0.767057
0.978617	0.892175	0.878061	0.720865	0.829795	0.831816	0.769231
0.9768	0.898284	0.870959	0.786502	0.833256	0.847279	0.753843
0.975678	0.898489	0.88586	0.819168	0.831027	0.849904	0.744813
0.974737	0.883264	0.894403	0.818862	0.829917	0.852211	0.725152
0.978528	0.892974	0.885485	0.798997	0.817791	0.861526	0.720545
0.977575	0.891139	0.874374	0.808324	0.838962	0.881512	0.704637
0.979377	0.895882	0.880118	0.823339	0.836279	0.889534	0.742468
0.978281	0.900171	0.888016	0.827146	0.877434	0.896066	0.743656
0.974697	0.892237	0.88935	0.821542	0.856653	0.881174	0.758343
0.975281	0.867051	0.869007	0.847699	0.867552	0.886353	0.721335
0.975432	0.874684	0.881843	0.834301	0.882068	0.891755	0.765947
0.979146	0.894625	0.870357	0.867091	0.893335	0.893871	0.747735
0.980541	0.891348	0.8916	0.832708	0.875106	0.882757	0.738226
0.976919	0.875689	0.882569	0.815627	0.8624	0.890753	0.690851
0.978437	0.880616	0.87036	0.818711	0.861226	0.881237	0.734607
0.97677	0.882226	0.869206	0.725152	0.853539	0.894772	0.711669
0.976385	0.865701	0.851242	0.720545	0.833464	0.871439	0.771943
0.97539	0.859579	0.831569	0.704637	0.830602	0.898359	0.773457
0.978539	0.87204	0.817054	0.742468	0.828245	0.896334	0.794758
0.973389	0.872559	0.810465	0.743656	0.789145	0.894155	0.815706
0.973274	0.877534	0.792249	0.758343	0.789948	0.894396	0.823213
0.976161	0.892364	0.788788	0.721335	0.807818	0.911356	0.843589
0.974468	0.907223	0.819843	0.785024	0.82656	0.846694	0.845364
0.979039	0.908436	0.825295	0.768799	0.81169	0.891637	0.857624
0.977804	0.913347	0.79231	0.762033	0.874168	0.890626	0.858712
0.977599	0.900519	0.7854	0.789174	0.879017	0.846336	0.844498
0.976372	0.897576	0.801015	0.785477	0.88211	0.838774	0.863784
0.976359	0.900233	0.812715	0.830363	0.881864	0.864265	0.867761
0.975836	0.89767	0.85105	0.774816	0.867401	0.860497	0.879263
0.977009	0.892721	0.815055	0.81185	0.898733	0.864014	0.873915
0.973299	0.897982	0.821946	0.821266	0.891052	0.86657	0.872339
0.969796	0.898426	0.845375	0.810707	0.891866	0.878423	0.864123
0.970446	0.899109	0.844761	0.809673	0.871275	0.866501	0.876972
0.974002	0.896659	0.857739	0.769017	0.863269	0.864877	0.88161
0.969426	0.885841	0.787268	0.714081	0.854253	0.845766	0.874174
0.966792	0.882714	0.774077	0.73414	0.859848	0.808113	0.888174
0.969378	0.88985	0.792906	0.706654	0.857769	0.813187	0.852477
0.967837	0.892613	0.784142	0.713827	0.83716	0.801906	0.854167
0.964384	0.903569	0.801466	0.722797	0.837725	0.806833	0.840672
0.960645	0.921214	0.827891	0.693026	0.834077	0.809639	0.830609
0.965264	0.936009	0.77795	0.704023	0.851373	0.815781	0.854026
0.964757	0.939876	0.758565	0.716362	0.797783	0.825889	0.865555
0.964063	0.944293	0.749874	0.77461	0.862381	0.820594	0.845757
0.958584	0.947418	0.739394	0.744813	0.820328	0.822885	0.835398
0.959675	0.949689	0.719506	0.725152	0.837339	0.801829	0.86018
0.960213	0.960824	0.730759	0.720545	0.845422	0.812914	0.893155
0.959348	0.953125	0.768969	0.704637	0.85326	0.840474	0.880139
0.955374	0.96207	0.744128	0.742468	0.826188	0.824808	0.898868
0.959059	0.964769	0.822601	0.743656	0.877912	0.837387	0.884047
0.955109	0.967712	0.874509	0.758343	0.860845	0.840175	0.88236
0.956844	0.96333	0.887082	0.721335	0.824449	0.845089	0.896035
0.958651	0.95579	0.888811	0.723704	0.803246	0.829337	0.899566
0.953236	0.971225	0.873359	0.773343	0.824075	0.845277	0.902294
0.957554	0.954474	0.881449	0.723355	0.837583	0.866652	0.899919
0.954524	0.969759	0.871209	0.650469	0.821383	0.880018	0.917286
0.953557	0.961983	0.87366	0.676129	0.827258	0.844041	0.916389
0.952586	0.966999	0.717207	0.640274	0.832836	0.861264	0.927306
0.956252	0.962873	0.756526	0.668685	0.823005	0.827939	0.9179
0.943799	0.961053	0.736718	0.702459	0.815438	0.86414	0.914791
0.939948	0.964548	0.730352	0.726769	0.820877	0.855095	0.934691
0.937784	0.959637	0.733014	0.688551	0.770161	0.821231	0.927515
0.935255	0.972367	0.717121	0.743563	0.786778	0.781077	0.926857
0.937455	0.970683	0.719618	0.762513	0.758376	0.798396	0.920139
0.932039	0.971367	0.741243	0.82986	0.773874	0.825085	0.921121
0.925395	0.97504	0.727948	0.78987	0.792066	0.824857	0.927997
0.937894	0.979803	0.704079	0.765212	0.792578	0.822577	0.915994
0.930563	0.974722	0.709943	0.721322	0.769913	0.826956	0.915275
0.93157	0.973882	0.72064	0.628534	0.720102	0.848127	0.920777
0.926484	0.975966	0.730994	0.714979	0.730708	0.844735	0.925114
0.928599	0.973782	0.738865	0.701741	0.749039	0.843218	0.911626
0.92892	0.97204	0.722074	0.679976	0.753103	0.837657	0.904667
0.926797	0.972619	0.70309	0.766076	0.807911	0.839131	0.902792
0.930616	0.971488	0.727891	0.806171	0.738328	0.832754	0.907314
0.929836	0.9718	0.743661	0.754629	0.763549	0.800197	0.908458
0.932436	0.972045	0.727629	0.829044	0.784513	0.828865	0.890101
0.925875	0.971429	0.756733	0.785007	0.800773	0.819301	0.907857
0.925261	0.97018	0.788286	0.805564	0.785064	0.805639	0.925512
0.916296	0.965842	0.756616	0.791499	0.779089	0.820807	0.921662
0.910822	0.963627	0.793871	0.748134	0.792467	0.826003	0.925697
0.909529	0.964957	0.774011	0.716291	0.793606	0.832005	0.937375
0.910753	0.964813	0.777954	0.710407	0.755556	0.83282	0.943037
0.916269	0.959199	0.774609	0.737557	0.780369	0.870139	0.943006
0.895916	0.956731	0.764086	0.7448	0.726228	0.866612	0.94707
0.897273	0.961845	0.756827	0.728953	0.724185	0.877621	0.941664
0.894085	0.963504	0.793126	0.784751	0.727871	0.854209	0.944534
0.905249	0.962215	0.781799	0.747735	0.746629	0.878931	0.946983
0.91849	0.962371	0.839205	0.738226	0.803138	0.882115	0.93638
0.928811	0.960739	0.876879	0.690851	0.809951	0.897868	0.901752
0.941192	0.955538	0.871676	0.734607	0.797279	0.906964	0.892084
0.954257	0.94993	0.860193	0.711669	0.785947	0.884331	0.860583
0.950791	0.947729	0.844828	0.810066	0.794223	0.875541	0.782987
0.953027	0.956151	0.846558	0.802885	0.787373	0.861074	0.779132
0.963543	0.950932	0.876469	0.833529	0.825729	0.859595	0.788743
0.96431	0.955774	0.873072	0.838962	0.806596	0.862194	0.712582
0.96624	0.950006	0.841463	0.836279	0.777794	0.892492	0.710216
0.963444	0.954758	0.795122	0.877434	0.748895	0.893564	0.760046
0.96608	0.96765	0.740689	0.856653	0.73031	0.932606	0.813096
0.962622	0.965214	0.719052	0.712582	0.776471	0.941638	0.872569
0.96653	0.964185	0.711036	0.710216	0.758822	0.916747	0.912447
0.967238	0.968602	0.702321	0.744813	0.7398	0.908895	0.921947
0.968059	0.961451	0.71804	0.725152	0.777458	0.885187	0.929381
0.969034	0.959428	0.754607	0.720545	0.742231	0.874398	0.926281
0.968851	0.951992	0.738067	0.704637	0.768315	0.851689	0.929701
0.970734	0.94845	0.76222	0.742468	0.787395	0.820808	0.929451
0.968136	0.947265	0.730357	0.743656	0.80259	0.783213	0.920612
0.967378	0.93634	0.753328	0.758343	0.809321	0.767931	0.917602
0.969028	0.929563	0.777988	0.721335	0.806625	0.771986	0.918
0.973959	0.924306	0.766833		0.836454	0.789474	0.937552
0.972043	0.928776	0.783963		0.828112	0.829961	0.934497
0.968052	0.910451	0.771328		0.831898	0.848988	0.928966
0.964686	0.888364	0.655309		0.839506	0.873428	0.926097
0.968371	0.883325	0.790091		0.840172	0.865094	0.914893
0.965245	0.892462	0.802114		0.864551	0.829519	0.902714
0.962221	0.899799	0.845939		0.881443	0.825231	0.917476
0.963169	0.883848	0.864318		0.864145	0.845642	0.908877
0.966078	0.843453	0.865111		0.837012	0.853706	0.910092
0.959602	0.841562	0.887644		0.816667	0.85719	0.907443
0.952248	0.81145	0.889259		0.840194	0.849692	0.906444
0.953721	0.742761	0.872441		0.817658	0.849278	0.920439
0.9253	0.696445	0.87276		0.851584	0.843509	0.928196
0.930803	0.734417	0.862655		0.814922	0.847768	0.920267
0.913331	0.852787	0.877368		0.825069	0.849364	0.923627
0.894411	0.891149	0.880825		0.83917	0.843494	0.923444
0.895553	0.884882	0.906877		0.863058	0.823574	0.923945
0.912495	0.878522	0.908271		0.855036	0.835402	0.933948
0.936866	0.872632	0.881219		0.835351	0.860258	0.921675
0.954229	0.893843	0.87636		0.856695	0.841521	0.92508
0.945814	0.920522	0.877039		0.872801	0.836766	0.937004
0.944382	0.921505	0.867915		0.875822	0.854516	0.937672
0.973533	0.92004	0.86665		0.878666	0.857496	0.914886
0.971121	0.933566	0.860132		0.884864	0.818626	0.91734
0.977316	0.930664	0.843849		0.855684	0.796887	0.90574
0.976019	0.934192	0.843935		0.846874	0.831774	0.916452
0.9727	0.939113	0.86128		0.851209	0.820026	0.899626
0.973184	0.937269	0.869094		0.845048	0.836699	0.909889
0.973365	0.948457	0.857006		0.858023	0.856637	0.906019
0.970273	0.94584	0.86716		0.850501	0.862487	0.898374
0.969897	0.951091	0.872571		0.859499	0.867765	0.89516
0.976761	0.94088	0.864807		0.877772	0.858357	0.906855
0.975225	0.952457	0.869499		0.867812	0.860779	0.889173
0.976825	0.954723	0.885336		0.866682	0.878304	0.868693
0.976175	0.955781	0.873758		0.871251	0.845471	0.846132
0.974822	0.951548	0.870931		0.868074	0.858588	0.834161
0.972182	0.948609	0.856637		0.87683	0.838074	0.818983
0.970364	0.942592	0.862487		0.86704	0.832318	0.854204
0.968556	0.945502	0.867765		0.872232	0.823099	0.842042
0.971751	0.948987	0.858357		0.874689	0.809587	0.842088
0.966604	0.951607	0.860779		0.87094	0.793355	0.877772
0.967804	0.954438	0.878304		0.863914	0.813695	0.867812
0.97241	0.95451	0.845471			0.799465	0.866682
0.97083	0.956138	0.858588			0.804383	0.871251
0.964369	0.957618	0.838074			0.815331	0.868074
0.949952	0.95261	0.832318			0.819854	0.87683
0.949195	0.95105				0.833246	0.86704
0.943944	0.94629				0.842604	0.872232
0.928105	0.950301				0.868037	0.874689
0.929898	0.956697				0.880976	0.87094
0.931259	0.952158				0.889703	0.863914
0.921671	0.961729				0.890315	0.843114
0.92084	0.962545				0.90443	0.8717
0.915306	0.961587				0.895768	0.877565
0.911158	0.962759				0.904186	0.853089
0.914959	0.965078				0.888768	0.844244
0.88804	0.96984				0.877311	0.833647
0.886142	0.969272				0.859434	0.813925
0.902621	0.971193				0.879855	0.774864
0.913917	0.969409				0.868379	0.78633
0.917521	0.970395				0.90321	0.777623
0.920748	0.971265				0.878361	0.741999
0.925559	0.969456				0.872486	0.724512
0.930899	0.965883				0.873464	0.738233
0.92866	0.966447				0.886108	0.783937
0.938282	0.968839				0.880273	0.731839
0.942548	0.966791				0.891739	0.751933
0.935367	0.965241				0.907343	0.779169
0.941664	0.97065				0.903328	0.745626
0.94377	0.969299				0.902643	0.701215
0.941854	0.969087				0.869157
0.95795	0.965386				0.893935
0.955077	0.967796				0.877098
0.949243	0.970408				0.858356
0.947091	0.958403				0.839892
0.942049	0.954322				0.862944
0.947252	0.952029				0.874529
0.949061	0.94602				0.869133
0.961953	0.946374				0.862933
0.958217	0.93439
0.958113	0.939572
0.961543	0.937683
0.948395	0.923393
0.950249	0.926068
0.965698	0.911873
0.961323	0.913667
0.962014	0.916403
0.962327	0.907644
0.960501	0.89378
0.955854	0.880845
0.952956	0.877968
0.956321	0.883929
0.95523	0.883918
0.960199	0.876715
0.955492	0.884305
0.907343
0.903328
0.902643
0.869157
0.893935
0.877098
0.858356
0.839892
0.862944
0.874529
0.869133
0.862933
