# Supplementary material for: Bi-channel image registration and deep-learning segmentation (BIRDS) for efficient, versatile 3D mapping of mouse brain
Source: eLife journal article supplement (doi:10.7554/elife.63455), 2021-01-18
Supplement: fig5-figsupp4-data1 [file figureSI10.xlsx]

## Sheet: SI10_a
Isocortex	HPF	OLF	CTXsp	STR	PAL	CB	DORsm	DORpm	HY	MBsen	MBmot	MBsta	P-sen	P-mot	P-sat	MY-sen	MY-mot
0.837095	0.83313	0.70478	0.679793	0.726827	0.722353	0.607916	0.81901	0.742408	0.827833	0.824137	0.881686	0.749757	0.835071	0.752527	0.798846	0.87611	0.664032
0.890644	0.863943	0.655865	0.697518	0.741547	0.748196	0.612915	0.826149	0.758576	0.805523	0.829367	0.886095	0.790382	0.855849	0.753014	0.767989	0.889068	0.713316
0.882787	0.836768	0.660383	0.687167	0.762364	0.743202	0.641122	0.835577	0.854093	0.794385	0.853883	0.907687	0.77962	0.848583	0.764114	0.810727	0.888266	0.744921
0.889976	0.86538	0.708993	0.673446	0.800572	0.776196	0.66652	0.841387	0.861515	0.763109	0.836657	0.940224	0.723752	0.848229	0.806047	0.822643	0.88221	0.780848
0.845078	0.905481	0.700969	0.775701	0.836894	0.771616	0.665553	0.835575	0.860921	0.760955	0.88507	0.92663	0.735537	0.849727	0.818257	0.826799	0.868762	0.794999
0.875505	0.929517	0.710203	0.753963	0.796691	0.734722	0.627504	0.828521	0.844798	0.780371	0.875646	0.939914	0.746329	0.825705	0.800228	0.830123	0.813101	0.802865
0.885537	0.802989	0.698895	0.770611	0.824067	0.770548	0.655891	0.821408	0.869034	0.787558	0.900813	0.92965	0.740338	0.806448	0.852366	0.864726	0.790888	0.811043
0.934678	0.880597	0.790809	0.696301	0.863087	0.738127	0.665506	0.823179	0.837006	0.805942	0.884032	0.9372	0.752601	0.804961	0.829548	0.85692	0.789328	0.806191
0.936946	0.858357	0.840981	0.659837	0.894057	0.753247	0.676266	0.824177	0.813022	0.774254	0.884133	0.892865	0.752731	0.813073	0.814713	0.853274	0.833455	0.83773
0.949744	0.864086	0.823831	0.700105	0.891176	0.753006	0.689964	0.81999	0.804561	0.772588	0.88412	0.845624	0.734543	0.827762	0.76467	0.868037	0.845968	0.830029
0.935492	0.900401	0.825173	0.709889	0.883156	0.752726	0.698554	0.841533	0.795619	0.794161	0.892768	0.80076	0.729503	0.846423	0.768931	0.84562	0.873821	0.839272
0.953444	0.852687	0.838568	0.712628	0.884192	0.731418	0.711809	0.852574	0.800158	0.7961	0.911672	0.745023	0.741176	0.854484	0.76857	0.864437	0.881794	0.8271
0.948177	0.851483	0.796748	0.74217	0.883678	0.691755	0.728449	0.833368	0.773714	0.793712	0.92437	0.708082	0.736103	0.882035	0.757576	0.862999	0.841576	0.832276
0.947239	0.914651	0.814254	0.777934	0.898412	0.687732	0.743027	0.858928	0.6704	0.783623	0.920209	0.684674	0.736328	0.877497	0.725046	0.859244	0.851423	0.812778
0.960631	0.832251	0.839719	0.808746	0.914645	0.741918	0.76423	0.851086	0.629918	0.785551	0.912268	0.658499	0.748241	0.883878	0.644943	0.872991	0.850223	0.800925
0.94676	0.862481	0.830791	0.801382	0.906466	0.733475	0.788709	0.847153	0.662126	0.784332	0.910069	0.643453	0.761231	0.855843	0.630143	0.878055	0.880695	0.837438
0.945873	0.843103	0.82231	0.8025	0.909695	0.716706	0.789973	0.833505	0.620168	0.721554	0.907858	0.674214	0.772727	0.802616	0.641635	0.88999	0.893302	0.878351
0.959295	0.812917	0.866299	0.810425	0.918835	0.739066	0.821738	0.835047	0.621844	0.796866	0.901101	0.662346	0.781384	0.72618	0.69506	0.897192	0.872768	0.872089
0.941113	0.831696	0.869599	0.819023	0.92093	0.721519	0.829359	0.835685	0.620588	0.785563	0.892625	0.726647	0.794921	0.671012	0.730014	0.884799	0.873362	0.896878
0.95325	0.821196	0.877727	0.822996	0.923417	0.710073	0.833858	0.856889	0.643256	0.78345	0.899809	0.74187	0.736016	0.671266	0.723158	0.871414	0.893536	0.883803
0.95518	0.76267	0.898333	0.813916	0.923655	0.78127	0.856643	0.864798	0.649592	0.779579	0.902218	0.778385	0.729573	0.685987	0.812823	0.874341	0.907498	0.888633
0.947396	0.787426	0.894197	0.807496	0.922144	0.739285	0.863867	0.885032	0.709738	0.809936	0.896609	0.766561	0.700464	0.710333	0.841021	0.86342	0.909065	0.891434
0.962796	0.818917	0.896159	0.823872	0.922405	0.673161	0.866812	0.875921	0.714576	0.794434	0.895552	0.792834	0.756662	0.742407	0.846455	0.850147	0.913849	0.885258
0.95727	0.805767	0.889034	0.837951	0.927582	0.691963	0.87249	0.87719	0.721516	0.807498	0.913191	0.79774	0.770023	0.751723	0.857566	0.864115	0.894327	0.883353
0.940349	0.815571	0.895801	0.838351	0.939396	0.710916	0.855709	0.882898	0.711333	0.783197	0.913609	0.802793	0.912265	0.758934	0.856914	0.847598	0.889413	0.881119
0.94343	0.824297	0.882182	0.808738	0.938974	0.725652	0.882841	0.884768	0.709735	0.770549	0.928917	0.795234	0.909964	0.762647	0.864212	0.862699	0.901265	0.878855
0.949975	0.825272	0.87091	0.806142	0.943507	0.735415	0.884627	0.885317	0.726846	0.77551	0.918507	0.802772	0.873931	0.773717	0.869219	0.862521	0.89738	0.877451
0.946808	0.823963	0.867909	0.81318	0.942559	0.723921	0.887783	0.879096	0.718243	0.800642	0.926867	0.847115	0.850727	0.797824	0.880703	0.874276	0.894029	0.888666
0.954877	0.839292	0.859393	0.825131	0.934604	0.736259	0.88646	0.882618	0.700436	0.785576	0.923048	0.859819	0.837905	0.766543	0.854309	0.880967	0.844499	0.895394
0.951614	0.801162	0.870098	0.853584	0.929175	0.763049	0.889689	0.888526	0.669071	0.787787	0.923219	0.855456	0.83737	0.7857	0.869462	0.895131	0.813974	0.893916
0.947766	0.819485	0.884655	0.839001	0.922969	0.756863	0.867387	0.87147	0.69522	0.800408	0.927639	0.832826	0.866434	0.76037	0.854296	0.883462	0.789391	0.90606
0.952373	0.847381	0.871804	0.831258	0.920038	0.807928	0.84588	0.862292	0.719409	0.818602	0.9269	0.835888	0.873732	0.741052	0.860979	0.859876	0.723974	0.898707
0.953675	0.832924	0.880074	0.848898	0.920923	0.790225	0.841624	0.87352	0.688933	0.835221	0.92248	0.845955	0.85163	0.747711	0.857585	0.829829	0.796779	0.907215
0.94015	0.826497	0.892509	0.853574	0.912256	0.828927	0.829058	0.843337	0.681332	0.834721	0.916073	0.883107	0.789407	0.738826	0.861374	0.799637	0.825189	0.921695
0.94943	0.797429	0.909091	0.870468	0.908852	0.823639	0.828144	0.879129	0.708185	0.87068	0.915254	0.870855	0.790964	0.761341	0.836189	0.804269	0.762353	0.909206
0.958127	0.810046	0.872379	0.88909	0.899326	0.847631	0.828796	0.895788	0.705226	0.882012	0.921138	0.882546	0.798533	0.780077	0.823861	0.798713	0.657949	0.899473
0.961777	0.874464	0.870657	0.893032	0.907997	0.835408	0.833485	0.884545	0.819052	0.884805	0.916385	0.880074	0.817194	0.764176	0.800807	0.80163	0.717722	0.908973
0.950988	0.87851	0.84517	0.886726	0.920746	0.843619	0.83452	0.891463	0.823802	0.896444	0.941488	0.875935	0.803762	0.766351	0.783405	0.822488	0.735612	0.924496
0.940413	0.85258	0.863911	0.890424	0.921732	0.849356	0.842226	0.90802	0.832788	0.889933	0.934586	0.879027	0.79307	0.759127	0.805799	0.845089	0.771131	0.925938
0.933895	0.841758	0.870953	0.904593	0.921064	0.863006	0.844901	0.915222	0.811907	0.896808	0.946315	0.879148	0.792688	0.762605	0.801077	0.864606	0.819647	0.910978
0.954503	0.842835	0.870358	0.899975	0.915544	0.863561	0.85851	0.910727	0.86048	0.904503	0.942662	0.880746	0.814715	0.760116	0.815501	0.82458	0.813533	0.915894
0.958509	0.85224	0.853679	0.892051	0.91566	0.871855	0.860792	0.910208	0.871287	0.898659	0.943519	0.887585	0.81522	0.745363	0.832965	0.806985	0.84346	0.912278
0.953958	0.868986	0.850489	0.896841	0.905354	0.86175	0.856839	0.907458	0.869593	0.902942	0.941867	0.883976	0.78019	0.742318	0.82885	0.798312	0.815529	0.910622
0.950166	0.872379	0.85791	0.892995	0.902675	0.882899	0.855583	0.895445	0.877068	0.906277	0.937689	0.882393	0.762351	0.753874	0.859388	0.827162	0.815308	0.921346
0.951506	0.874371	0.853199	0.880177	0.901652	0.856113	0.865108	0.888035	0.88395	0.896808	0.93778	0.889422	0.787315	0.709733	0.844282	0.819253	0.819216	0.923118
0.957221	0.901752	0.823469	0.876223	0.904845	0.844619	0.863903	0.889055	0.870552	0.904891	0.935342	0.885719	0.77729	0.739265	0.838067	0.817105	0.792559	0.912424
0.953189	0.902388	0.828558	0.887626	0.910649	0.863963	0.860597	0.889136	0.880134	0.895051	0.926439	0.897829	0.774608	0.767792	0.841932	0.796665	0.718108	0.918533
0.949931	0.912375	0.834896	0.889065	0.90782	0.854802	0.855909	0.90059	0.875905	0.899114	0.928825	0.900252	0.815201	0.824314	0.870628	0.789969	0.656868	0.918747
0.941852	0.921966	0.849851	0.883018	0.893685	0.866007	0.851527	0.89828	0.874065	0.903255	0.930539	0.896345	0.83079	0.813968	0.874789	0.790607	0.829454	0.928817
0.948218	0.922158	0.864636	0.870044	0.900597	0.873516	0.85618	0.877568	0.890006	0.905988	0.938724	0.897614	0.819697	0.799448	0.86778	0.758762	0.786759	0.915417
0.949962	0.921642	0.862077	0.864038	0.901278	0.853616	0.84706	0.874297	0.880478	0.909261	0.929457	0.904628	0.814595	0.810107	0.864738	0.704313	0.754515	0.917563
0.950191	0.914918	0.846904	0.85197	0.915186	0.849454	0.845648	0.882053	0.874562	0.915579	0.92563	0.893992	0.859963	0.760946	0.863283	0.681133	0.736386	0.905805
0.95223	0.91904	0.863303	0.849391	0.916841	0.859168	0.847783	0.87025	0.872588	0.910643	0.946	0.904182	0.933789	0.740297	0.866523	0.624316	0.705628	0.899318
0.953993	0.92371	0.875344	0.834128	0.91588	0.853418	0.828615	0.870964	0.876323	0.898328	0.934299	0.900016	0.91109	0.729703	0.878367	0.583876	0.677212	0.885325
0.959192	0.921718	0.87541	0.842873	0.915729	0.848722	0.824366	0.875483	0.882755	0.893433	0.931185	0.906598	0.815418	0.779854	0.858092	0.58076	0.826872	0.876863
0.963013	0.925792	0.893141	0.843516	0.913041	0.838856	0.817572	0.859669	0.881214	0.893502	0.926309	0.907405	0.754573	0.768316	0.857964	0.60851	0.868592	0.890524
0.962651	0.925523	0.890181	0.836461	0.912431	0.82356	0.829628	0.901624	0.880576	0.887648	0.930592	0.908709	0.763389	0.721032	0.861021	0.666107	0.910376	0.879804
0.957656	0.931275	0.879021	0.827888	0.925335	0.823003	0.827074	0.880207	0.869249	0.886048	0.926457	0.923596	0.780652	0.70419	0.843498	0.646678	0.903428	0.877406
0.961266	0.937058	0.884004	0.80317	0.928766	0.827872	0.820767	0.903935	0.890367	0.895614	0.912845	0.921731	0.822881	0.67885	0.828185	0.652367	0.908809	0.885139
0.958597	0.937582	0.896947	0.793512	0.928153	0.864537	0.823918	0.896364	0.898344	0.896024	0.9361	0.918776	0.781421	0.704297	0.827247	0.717148	0.894128	0.87387
0.958913	0.937258	0.897696	0.808936	0.925924	0.840901	0.819084	0.883184	0.9047	0.890998	0.918697	0.919185	0.789661	0.703535	0.804414	0.782742	0.903762	0.891713
0.962621	0.945595	0.894655	0.795684	0.919401	0.851101	0.811735	0.892973	0.911708	0.903179	0.909033	0.914344	0.741218	0.703486	0.781845	0.850128	0.886428	0.88774
0.969485	0.954727	0.908896	0.773395	0.914556	0.840313	0.799725	0.918881	0.898995	0.910204	0.901399	0.907584	0.774946	0.723907	0.752186	0.884512	0.831886	0.895258
0.967404	0.946636	0.916373	0.786021	0.918215	0.82984	0.797943	0.909984	0.907368	0.915498	0.914722	0.912066	0.795799	0.734694	0.724329	0.892222	0.85561	0.881713
0.970736	0.953041	0.914255	0.81267	0.904223	0.8397	0.791837	0.888097	0.92707	0.918813	0.903769	0.907374	0.75	0.741133	0.712947	0.893233	0.858274	0.890198
0.968302	0.955441	0.917415	0.792315	0.914415	0.818506	0.808861	0.882485	0.926059	0.900106	0.898833	0.908946	0.74428	0.72982	0.726204	0.888168	0.736585	0.895601
0.970717	0.951032	0.92105	0.793634	0.920066	0.812688	0.820981	0.875341	0.90985	0.904629	0.892085	0.893988	0.76291	0.760227	0.706389	0.893046	0.718954	0.897011
0.964826	0.953324	0.925973	0.811487	0.926955	0.799426	0.828933	0.848991	0.899288	0.906347	0.897147	0.891129	0.765718	0.740979	0.716387	0.885104	0.704125	0.893335
0.959886	0.950333	0.911382	0.79697	0.924973	0.784279	0.848849	0.861204	0.910501	0.909886	0.894396	0.881874	0.773333	0.766107	0.684486	0.874573	0.670631	0.876317
0.953198	0.95365	0.905419	0.771061	0.931333	0.77962	0.858128	0.858531	0.901703	0.91961	0.898797	0.898806	0.769835	0.778998	0.636285	0.859086	0.700162	0.876683
0.961204	0.950693	0.905554	0.785635	0.923823	0.809361	0.86211	0.86549	0.914838	0.921134	0.892259	0.890711	0.767398	0.775199	0.584625	0.879457	0.75783	0.87788
0.96252	0.95531	0.891541	0.806071	0.932609	0.799056	0.865158	0.884725	0.899563	0.929555	0.87474	0.90466	0.749328	0.800958	0.609599	0.853732	0.783505	0.872644
0.960143	0.953791	0.894511	0.809442	0.926671	0.812846	0.86069	0.875252	0.919301	0.929971	0.846742	0.904717	0.768687	0.779881	0.589435	0.801521	0.785938	0.884387
0.957185	0.951267	0.882346	0.816341	0.922336	0.801504	0.857638	0.864793	0.924699	0.923884	0.841975	0.907496	0.790048	0.803009	0.553538	0.750527	0.787616	0.884745
0.957075	0.953167	0.894459	0.80172	0.932479	0.751551	0.874307	0.870574	0.920824	0.925827	0.829811	0.90942	0.777682	0.79825	0.592888	0.734411	0.827223	0.878921
0.959202	0.95623	0.907009	0.78035	0.93987	0.750035	0.874883	0.871284	0.905901	0.930547	0.85425	0.906133	0.754017	0.797889	0.646095	0.774079	0.837405	0.885149
0.958555	0.9574	0.909887	0.787382	0.937842	0.727503	0.881722	0.877392	0.90425	0.931766	0.855063	0.909756	0.753452	0.798246	0.689261	0.788329	0.873027	0.886674
0.954322	0.957873	0.911197	0.77436	0.940994	0.755013	0.885662	0.872185	0.909653	0.92844	0.831897	0.912951	0.75232	0.817105	0.697881	0.799274	0.895092	0.8985
0.958096	0.954169	0.902987	0.758776	0.939219	0.739815	0.872406	0.887885	0.90984	0.928032	0.833635	0.922755	0.720532	0.811901	0.718555	0.795052	0.906065	0.883873
0.960357	0.959799	0.906032	0.734351	0.931751	0.715828	0.872234	0.886757	0.907001	0.937577	0.809697	0.91828	0.726276	0.794441	0.698924	0.838143	0.906347	0.871723
0.962664	0.959986	0.92273	0.743116	0.922283	0.72011	0.869861	0.878848	0.916122	0.941952	0.808247	0.917328	0.716767	0.795849	0.732211	0.838051	0.889583	0.868009
0.963871	0.960107	0.915708	0.748054	0.918771	0.693458	0.867353	0.837133	0.914489	0.938903	0.830704	0.913421	0.719185	0.797952	0.766314	0.873262	0.8825	0.868187
0.964539	0.959921	0.893911	0.762676	0.927896	0.680301	0.862029	0.874704	0.90797	0.942321	0.825872	0.913679	0.708239	0.79038	0.778561	0.84179	0.86006	0.861671
0.960214	0.959901	0.906531	0.768379	0.924067	0.709727	0.86498	0.846653	0.882445	0.934434	0.81001	0.914916	0.739489	0.805824	0.777096	0.88287	0.871437	0.878361
0.959819	0.960323	0.916104	0.758175	0.929271	0.689811	0.864877	0.858945	0.909407	0.934949	0.809802	0.911359		0.811705	0.783205	0.87653	0.871096	0.865924
0.962073	0.960788	0.899579	0.662617	0.929678	0.72795	0.869024	0.85472	0.879533	0.941361	0.809507	0.910729		0.803279	0.814122	0.864536	0.859259	0.814656
0.962943	0.96068	0.900815	0.724881	0.922793	0.754111	0.868327	0.76685	0.875275	0.932607	0.836219	0.903333		0.798055	0.81629	0.859822	0.852434	0.693996
0.965035	0.961463	0.91437	0.708836	0.928408	0.770999	0.873344	0.788008	0.89356	0.936098	0.835918	0.903814		0.789787	0.839154	0.854593	0.835609	0.617103
0.963007	0.960986	0.909595	0.703475	0.927118	0.717955	0.864836	0.79593	0.827181	0.928981	0.845043	0.897148		0.765727	0.856753	0.849981	0.838217	0.608822
0.964858	0.960587	0.886739	0.76119	0.920797	0.763489	0.875085	0.819615	0.857187	0.935321	0.889424	0.901865		0.769545	0.881733	0.840985	0.819155	0.586754
0.963113	0.96419	0.903719	0.778285	0.928194	0.756854	0.873551	0.825595	0.849873	0.936069	0.895473	0.906354		0.782795	0.886703	0.759725	0.839711	0.624892
0.96315	0.965105	0.906576	0.788488	0.923745	0.734472	0.877704	0.839501	0.883319	0.932632	0.895652	0.901173		0.780841	0.880335	0.723188	0.814283	0.766054
0.964011	0.963804	0.909593	0.781457	0.93652	0.774663	0.887186	0.830114	0.887692	0.940754	0.891709	0.896223		0.813019	0.89079	0.709226	0.766872	0.829207
0.959095	0.963866	0.907552	0.787968	0.929115	0.798634	0.892082	0.845763	0.895437	0.942766	0.872841	0.896684		0.822387	0.902148	0.652789	0.739614	0.812421
0.965623	0.967828	0.899932	0.814328	0.933117	0.788561	0.899656	0.816136	0.897601	0.938711	0.870627	0.90444		0.78318	0.897048	0.676962	0.672758	0.839837
0.967528	0.970219	0.883718	0.755433	0.936507	0.79479	0.895268	0.819658	0.917305	0.943427	0.869791	0.891493		0.74931	0.878891	0.668976	0.64751	0.817599
0.968289	0.971477	0.901232	0.764634	0.938076	0.804493	0.896062	0.747754	0.893781	0.949648	0.854129	0.883208		0.709776	0.873631	0.635449	0.650847	0.81671
0.967035	0.96769	0.911172	0.746297	0.931875	0.800129	0.885834	0.743888	0.893921	0.944248	0.808714	0.880219		0.751017	0.842931	0.567699	0.601873	0.817557
0.966968	0.968032	0.904647	0.76403	0.937169	0.76932	0.873833	0.660787	0.866062	0.946326	0.687736	0.87992		0.709665	0.855045	0.684674		0.862341
0.969569	0.967816	0.882515	0.73468	0.932689	0.786974	0.880591	0.576539	0.88668	0.930887	0.723577	0.883771		0.664139	0.850098	0.739267		0.874755
0.970658	0.970055	0.890517	0.758161	0.938329	0.809237	0.874505	0.550435	0.88733	0.933723	0.749404	0.891304		0.680817	0.85011	0.769396		0.874175
0.969063	0.971102	0.885322	0.664353	0.934645	0.830457	0.868194	0.622334	0.870239	0.933732	0.723796	0.896959		0.672059	0.859863	0.788312		0.875414
0.96956	0.970645	0.890533	0.718295	0.924877	0.812449	0.860461	0.644487	0.85721	0.933765	0.715541	0.899383		0.669104	0.836319	0.830418		0.881138
0.967609	0.969207	0.871611	0.669531	0.927547	0.721393	0.858581	0.646112	0.876302	0.911015	0.738864	0.899541		0.693546	0.820642	0.848117		0.867835
0.969268	0.966411	0.86869	0.663352	0.924953	0.746852	0.879874	0.669276	0.864442	0.880557	0.742739	0.895044		0.737327	0.836998	0.814529		0.866296
0.972733	0.967967	0.84718	0.645894	0.931427	0.757835	0.870904	0.77552	0.886066	0.876595	0.743038	0.899164		0.722664	0.810311	0.824355		0.856072
0.970713	0.969023	0.838182	0.646154	0.924438	0.807114	0.875928	0.796138	0.891377	0.843458	0.739456	0.900353		0.761628	0.807722	0.810424		0.858963
0.971609	0.966458	0.808673	0.656151	0.913968	0.789364	0.884442	0.820874	0.871524	0.821306	0.790312	0.898671		0.789253	0.804	0.829291		0.86709
0.970608	0.972482	0.800564	0.616246	0.920992	0.785816	0.884535	0.812843	0.877866	0.801886	0.794296	0.905238		0.826485	0.803094	0.824909		0.867501
0.968203	0.968852	0.867576	0.624434	0.918378	0.807752	0.906259	0.818013	0.883447	0.783195	0.82093	0.900766		0.847773	0.818447	0.813162		0.864824
0.97106	0.969338	0.865903	0.655724	0.922419	0.809102	0.915961	0.79904	0.888211	0.787244	0.828819	0.901624		0.85749	0.829765	0.814911		0.861054
0.971348	0.965621	0.866194	0.638929	0.931927	0.769939	0.914942	0.830833	0.879094	0.678753	0.83601	0.914649		0.867301	0.827551	0.81099		0.876756
0.976095	0.960834	0.860954	0.603738	0.934204	0.789151	0.914321	0.82602	0.900225	0.68332	0.848526	0.865985		0.864601	0.800468	0.798271		0.873497
0.974529	0.962522	0.884326	0.682493	0.928621	0.777081	0.912388	0.843276	0.91487	0.791226	0.850109	0.902436		0.873556	0.802972	0.782375		0.870954
0.971484	0.95957	0.881125	0.620848	0.928698	0.749229	0.914216	0.857353	0.911662	0.805608	0.847392	0.860081		0.872395	0.787844	0.779849		0.850231
0.97238	0.960255	0.858312	0.658324	0.932385	0.741757	0.904843	0.84512	0.912116	0.854501	0.88801	0.822034		0.875206	0.849351	0.792747		0.821007
0.973189	0.959324	0.823307	0.653075	0.943456	0.731026	0.902897	0.813985	0.923233	0.874429	0.876266	0.798807		0.868249	0.852242	0.817075		0.828749
0.972729	0.963877	0.862185	0.692701	0.939679	0.676454	0.898309	0.830289	0.909699	0.902662	0.882057	0.761012		0.863244	0.81722	0.855994		0.846178
0.972816	0.967019	0.835491	0.733403	0.938152	0.6573	0.890355	0.838886	0.911136	0.907195	0.913345	0.818393		0.861024	0.826336	0.885323		0.843349
0.973201	0.963349	0.82914	0.692104	0.941507	0.614926	0.897561	0.843096	0.911485	0.917349	0.877743	0.82442		0.856493	0.781747	0.873571		0.846443
0.97451	0.969864	0.847133	0.6798	0.944142	0.762932	0.9099	0.854839	0.89362	0.916481	0.897907	0.822769		0.848142	0.816595	0.872569		0.845045
0.9712	0.97201	0.833899	0.715122	0.945849	0.778926	0.91287	0.858937	0.908064	0.930832	0.909273	0.828828		0.849974	0.79844	0.853613		0.86918
0.973903	0.967776	0.83634	0.657839	0.94328	0.835106	0.90382	0.842967	0.90776	0.946141	0.92372	0.847938		0.839827	0.700989	0.866157		0.881081
0.969694	0.965112	0.807111	0.682871	0.944767	0.83008	0.916048	0.859896	0.925584	0.942345	0.919266	0.873299		0.835817	0.637376	0.874019		0.869858
0.973626	0.968319	0.808599	0.698661	0.945042	0.805292	0.928582	0.855725	0.93825	0.946537	0.899679	0.876311		0.828321	0.619634	0.843575		0.868726
0.974878	0.969111	0.784138	0.681349	0.940031	0.806315	0.920262	0.864706	0.930762	0.944628	0.910729	0.868726		0.798736	0.558819	0.859918		0.855317
0.973549	0.967661	0.816881	0.665505	0.938828	0.866749	0.914567	0.851516	0.931383	0.94559	0.913781	0.882607		0.749076	0.550123	0.871092		0.84976
0.973959	0.963315	0.83499	0.685552	0.944275	0.865448	0.912308	0.845808	0.916389	0.951752	0.904202	0.897902		0.665542	0.631913	0.882043		0.864844
0.975004	0.959391	0.815444	0.703057	0.940842	0.81496	0.911733	0.860722	0.918156	0.942387	0.916084	0.904976		0.73706	0.694606	0.880298		0.886121
0.976649	0.953263	0.819913	0.695542	0.933396	0.7941	0.916667	0.835253	0.909838	0.938921	0.911896	0.901354			0.667175	0.876255		0.882336
0.975963	0.963239	0.842354	0.637511	0.931945	0.838607	0.919805	0.839055	0.922604	0.940468	0.921911	0.902278			0.673343	0.88528		0.858206
0.972986	0.956508	0.847041	0.703831	0.933937	0.792178	0.909758	0.837926	0.917416	0.922742	0.924364	0.89825			0.725461	0.894307		0.898532
0.973739	0.943643	0.821628	0.705534	0.935051	0.762231	0.906245	0.843897	0.910696	0.93481	0.921132	0.894391			0.791018	0.890841		0.866742
0.971571	0.934889	0.845452	0.731532	0.934257	0.727866	0.906275	0.834281	0.917865	0.921794	0.913899	0.896427			0.805742	0.866692		0.915807
0.975013	0.935886	0.846579	0.646132	0.944124	0.695355	0.906317	0.854139	0.9134	0.925645	0.915658	0.903447			0.800984	0.862829		0.916494
0.972781	0.917077	0.834469	0.591001	0.940003	0.63906	0.89674	0.867864	0.921928	0.920843	0.924625	0.898176			0.80812	0.847948		0.897445
0.970254	0.935351	0.851098	0.680714	0.93874	0.613665	0.893868	0.888043	0.929837	0.936942	0.921725	0.880233			0.770212	0.840995		0.90906
0.971774	0.931505	0.82561	0.692677	0.942388	0.667272	0.899437	0.866403	0.944734	0.939704	0.935015	0.887132			0.811939	0.822		0.908217
0.973421	0.937047	0.824541	0.763767	0.941801	0.728142	0.894818	0.867844	0.94573	0.941268	0.921013	0.873306			0.825536	0.846596		0.901915
0.969836	0.942242	0.834431	0.810239	0.943374	0.755975	0.884723	0.872655	0.93097	0.944784	0.937693	0.881936			0.823874	0.831617		0.890865
0.971926	0.941473	0.852745	0.822895	0.947067	0.696269	0.879959	0.882956	0.932513	0.944849	0.926152	0.890795			0.789427	0.851758		0.893222
0.972866	0.939831	0.832381	0.815634	0.942664	0.759701	0.889733	0.883652	0.910854	0.939969	0.928635	0.898406			0.764176	0.878782		0.882933
0.970206	0.938121	0.846118	0.793147	0.943556	0.770006	0.880763	0.904475	0.881989	0.934259	0.93392	0.906706			0.747078	0.856518		0.902517
0.972005	0.937231	0.808483	0.836093	0.942188	0.760028	0.862572	0.899711	0.878564	0.937593	0.938145	0.904948			0.771617	0.870085		0.893668
0.971989	0.934242	0.808243	0.85175	0.938895	0.749899	0.868444	0.897737	0.871471	0.93089	0.934832	0.894635			0.722551	0.855868		0.891953
0.970134	0.936944	0.860606	0.845245	0.924443	0.772392	0.87845	0.8941	0.89255	0.924232	0.929125	0.895483			0.689374	0.850941		0.88974
0.970587	0.934384	0.865998	0.860975	0.934058	0.765429	0.861791	0.884967	0.876739	0.920887	0.924797	0.896321			0.717949	0.798818		0.885384
0.968374	0.93741	0.85903	0.857475	0.935867	0.739688	0.862765	0.894379	0.883978	0.925108	0.935481	0.902364			0.680412	0.778549		0.877159
0.968321	0.939538	0.891169	0.828199	0.926096	0.735049	0.852739	0.886658	0.89431	0.913102	0.932208	0.903949				0.780832		0.876571
0.966503	0.933064	0.8622	0.806794	0.93512	0.709539	0.858081	0.873168	0.904636	0.907657	0.945068	0.904779				0.759118		0.895103
0.967242	0.932145	0.866763	0.821228	0.935769	0.74497	0.885101	0.891373	0.901891	0.910432	0.932857	0.906904						0.891277
0.967125	0.93094	0.843719	0.782325	0.939203	0.728661	0.864976	0.909507	0.906392	0.909601	0.938513	0.907529						0.887616
0.970215	0.934853	0.839531	0.791809	0.933857	0.678173	0.87758	0.901369	0.909924	0.903126	0.938644	0.909516						0.899265
0.969436	0.92612	0.868562	0.79187	0.933604	0.674401	0.876989	0.887723	0.918695	0.903321	0.942473	0.913571						0.911902
0.968759	0.92817	0.84539	0.825329	0.92923	0.718572	0.878343	0.888914	0.918579	0.907871	0.929887	0.912782						0.902634
0.968317	0.926627	0.836086	0.802475	0.934523	0.773567	0.871605	0.872542	0.923999	0.892199	0.941393	0.917242						0.892931
0.968821	0.931862	0.829443	0.827021	0.929066	0.721941	0.873661	0.883845	0.901081	0.888718	0.934479	0.920397						0.890848
0.966477	0.93027	0.819901	0.801245	0.923179	0.743918	0.87953	0.873584	0.906297	0.890413	0.92596	0.910985						0.879467
0.967561	0.925078	0.812291	0.848386	0.913616	0.732659	0.882177	0.900209	0.890886	0.886729	0.914167	0.906065						0.869226
0.965144	0.922035	0.838175	0.864157	0.891428	0.714253	0.86934	0.881406	0.895316	0.876605	0.914618	0.897917						0.892738
0.966899	0.918393	0.831921	0.873205	0.862082	0.68996	0.867274	0.901854	0.900827	0.875211	0.916228	0.893716						0.866007
0.964662	0.912414	0.838685	0.889501	0.871932	0.771669	0.862842	0.904	0.895737	0.855242	0.912237	0.894536						0.865687
0.965372	0.911781	0.824944	0.886395	0.885247	0.746283	0.863993	0.882511	0.893894	0.85783	0.924348	0.900488						0.822561
0.967091	0.921985	0.83577	0.889293	0.886746	0.747308	0.867186	0.889858	0.89909	0.858467	0.92747	0.889982						0.847929
0.965643	0.914303	0.810984	0.899893	0.87854	0.776233	0.868173	0.8972	0.887473	0.868852	0.915183	0.889454						0.842266
0.963246	0.911033	0.830012	0.903299	0.865102	0.756744	0.869968	0.896672	0.879805	0.861763	0.923405	0.895341						0.842449
0.964339	0.923403	0.845366	0.899132	0.872392	0.751077	0.863274	0.891474	0.888516	0.866998	0.923018	0.8924						0.835553
0.968061	0.916108	0.869926	0.894667	0.875324	0.749367	0.867516	0.833994	0.900778	0.875346	0.910028	0.902715						0.820377
0.966359	0.914768	0.879973	0.902105	0.883655	0.747068	0.903411	0.853292	0.880178	0.866854	0.916593	0.893305						0.872601
0.963557	0.916246	0.886571	0.889122	0.902023	0.759193	0.899208	0.87685	0.860743	0.868281	0.910362	0.889425						0.888454
0.964727	0.916662	0.901927	0.892138	0.897209	0.751432	0.876268	0.848175	0.879088	0.885025	0.916041	0.897465						0.873483
0.964083	0.916805	0.900273	0.889899	0.89491	0.740793	0.866559	0.853142	0.872739	0.876215	0.895382	0.87973						0.860701
0.966189	0.924573	0.883701	0.885799	0.888517	0.718545	0.885925	0.877766	0.848181	0.874224	0.90784	0.89436						0.846331
0.964213	0.921341	0.864949	0.901627	0.882402	0.713583	0.885585	0.868502	0.879247	0.894176	0.901518	0.89202						0.845287
0.965451	0.916851	0.887889	0.905786	0.879963	0.703006	0.891624	0.870268	0.865071	0.897947	0.915738	0.88754						0.85203
0.959067	0.912818	0.872262	0.883782	0.886769	0.669307	0.874508	0.860463	0.859211	0.89181	0.915839	0.904289						0.777546
0.964405	0.91115	0.862448	0.880514	0.879924	0.70411	0.883155	0.857663	0.838356	0.884158	0.919762	0.901513						0.800248
0.968327	0.909877	0.847841	0.893965	0.877461	0.704639	0.90081	0.854094	0.854426	0.88606	0.924823	0.891533						0.755266
0.966494	0.903783	0.839305	0.883326	0.87631	0.711052	0.916037	0.848202	0.87625	0.897412	0.918283	0.892484						0.656974
0.969048	0.910417	0.838411	0.895282	0.874334	0.736893	0.91302	0.813683	0.876444	0.897929	0.907531	0.892535						0.650624
0.970159	0.899355	0.860082	0.906873	0.865113	0.755089	0.905421	0.822739	0.888889	0.889281	0.89738	0.894286
0.966342	0.894914	0.894431	0.910528	0.871283	0.777483	0.896288	0.839469	0.894083	0.887667	0.883759	0.896847
0.966781	0.887704	0.862881	0.91615	0.862705	0.774112	0.895615	0.865071	0.882123	0.871085	0.89083	0.887992
0.967164	0.891835	0.824885	0.912417	0.868087	0.792994	0.895294	0.867604	0.880145	0.854713	0.881758	0.88519
0.963129	0.893757	0.830401	0.904861	0.878056	0.779369	0.917135	0.863158	0.857461	0.844488	0.893116	0.889092
0.964271	0.88287	0.806008	0.894908	0.887224	0.792177	0.922057	0.864559	0.86158	0.838421	0.879215	0.87845
0.962091	0.877039	0.807958	0.899037	0.880767	0.830161	0.925591	0.862866	0.867863	0.836007	0.855319	0.874621
0.965377	0.866582	0.784374	0.901381	0.87525	0.823464	0.929858	0.867156	0.879388	0.79361	0.838424	0.864116
0.963976	0.883029	0.801641	0.893529	0.875609	0.846529	0.913765	0.860961	0.892124	0.790529	0.836484	0.867726
0.962229	0.876098	0.803332	0.901111	0.891307	0.835725	0.913606	0.84648	0.911373	0.779874	0.81865	0.860573
0.964437	0.878327	0.830514	0.904552	0.869688	0.80677	0.922262	0.838187	0.904088	0.796294	0.815451	0.843904
0.964893	0.893091	0.839872	0.896046	0.86169	0.824759	0.932338	0.832454	0.902568	0.820361	0.771883	0.867045
0.965306	0.898304	0.8695	0.906174	0.864731	0.868074	0.925933	0.836489	0.903941	0.828842	0.77894	0.868849
0.963039	0.912917	0.902218	0.886038	0.870792	0.878842	0.923879	0.803599	0.916601	0.808574	0.73194	0.883445
0.961174	0.929628	0.896464	0.865829	0.863102	0.878329	0.92078	0.799776	0.907492	0.811841	0.704042	0.861136
0.961098	0.932068	0.889824	0.875413	0.862124	0.870033	0.907361	0.783584	0.906984	0.833791	0.642101	0.855895
0.960623	0.938168	0.896532	0.866288	0.849144	0.891549	0.910672	0.825591	0.915695	0.820623		0.883494
0.963932	0.956508	0.874637	0.877102	0.798593	0.895522	0.910748	0.833969	0.918247	0.84725		0.869562
0.966419	0.960033	0.890491	0.866909	0.807806	0.898341	0.909157	0.800735	0.906265	0.808056		0.864984
0.969912	0.958354	0.909738	0.821209	0.807102	0.906271	0.904194		0.90603	0.790258		0.862872
0.966414	0.963457	0.891618	0.823226	0.80904	0.894842	0.915523		0.9072	0.806758		0.859035
0.968605	0.970441	0.912798	0.775151	0.787912	0.883894	0.905691		0.891234	0.793558		0.865942
0.970534	0.967491	0.925547	0.779185	0.779578	0.907105	0.921093		0.899856	0.794734		0.820947
0.970161	0.969939	0.927858	0.792729	0.771922	0.896418	0.918544		0.901791	0.828922		0.80559
0.969964	0.971265	0.938547	0.749395	0.759747	0.873422	0.899646		0.906449	0.804469		0.80669
0.968754	0.970774	0.933107	0.738583	0.76932	0.880203	0.921627		0.882461	0.800106		0.81212
0.968501	0.966849	0.943209	0.723568	0.797357	0.854326	0.90786		0.888593	0.824006		0.800591
0.968628	0.969574	0.932004	0.762821	0.783556	0.854443	0.896596		0.887861	0.797585		0.772638
0.97073	0.961362	0.926461	0.786517	0.785017	0.864801	0.899517		0.892983	0.839367		0.788011
0.966942	0.965057	0.926387	0.781942	0.781415	0.874042	0.907203		0.903663	0.851016		0.782155
0.966518	0.964295	0.912988	0.741678	0.758355	0.868398	0.904417		0.900824	0.834669		0.796508
0.969132	0.962219	0.926518	0.761296	0.798997	0.846855	0.909244		0.899235	0.834545		0.81882
0.970479	0.966108	0.911025	0.717238	0.844373	0.840929	0.914186		0.891277	0.808833		0.808819
0.970362	0.963903	0.930586	0.703194	0.859326	0.850682	0.909951		0.875232	0.853787		0.824378
0.96979	0.962545	0.921754	0.719825	0.881541	0.854353	0.914836		0.880505	0.834958		0.81528
0.963781	0.967578	0.920902	0.640045	0.8751	0.839996	0.922049		0.896037	0.815514		0.788017
0.963896	0.966864	0.927857	0.703581	0.901385	0.84454	0.921879		0.883289	0.810144		0.768078
0.962898	0.9658	0.914595		0.894803	0.844759	0.917543		0.874659	0.801444		0.756908
0.962399	0.967075	0.907951		0.897503	0.859689	0.927605		0.871915	0.790889		0.776676
0.963311	0.966938	0.907163		0.904228	0.85053	0.931212		0.887462	0.767305		0.802706
0.962385	0.966321	0.917751		0.897197	0.848801	0.924712		0.87442			0.831071
0.957086	0.961853	0.918095		0.896998	0.815952	0.921976		0.871632			0.877725
0.958364	0.963348	0.924215		0.901117	0.822505	0.920727		0.875905			0.91923
0.962822	0.962853	0.92057		0.896699	0.815565	0.916658		0.870502			0.912823
0.960773	0.960988	0.912119		0.887936	0.791583	0.914016		0.880362			0.897914
0.965549	0.959896	0.909135		0.896837	0.832228	0.909055		0.869522			0.89513
0.966244	0.965122	0.900623		0.890607	0.820755	0.898033		0.879786			0.897008
0.964206	0.958512	0.863823		0.898344	0.852584	0.912679		0.862278			0.905295
0.966936	0.956392	0.885057		0.898019	0.844178	0.895115		0.884403			0.869459
0.960262	0.956514	0.862527		0.891787	0.889469	0.906143		0.887999
0.963649	0.961668	0.83864		0.899087	0.848968	0.908032		0.881506
0.966303	0.9586	0.852987		0.893911	0.835711	0.906972		0.879855
0.965	0.956752	0.852345		0.894978	0.776356	0.907305		0.867323
0.968777	0.954251	0.849527		0.898997	0.8485	0.905652		0.846564
0.966977	0.959619	0.769184		0.896382	0.861878	0.902946		0.829498
0.965189	0.962565	0.732934		0.904687	0.834309	0.899418		0.768571
0.96832	0.958243	0.724975		0.905615	0.813344	0.896437		0.744606
0.969371	0.956426	0.807652		0.909153	0.753055	0.907407		0.747493
0.971672	0.956583	0.72878		0.912496	0.795913	0.903289		0.675761
0.971455	0.949685	0.772967		0.908339	0.777377	0.886556		0.67674
0.970689	0.941903	0.852618		0.907412	0.808251	0.887308		0.700199
0.972376	0.937801	0.911408		0.910396	0.757801	0.866353		0.674232
0.966988	0.945478	0.901575		0.900119	0.715852	0.88689		0.678877
0.968219	0.937569	0.907745		0.90329	0.772418	0.870981		0.75722
0.965508	0.935015	0.911755		0.874836	0.757849	0.853011		0.801763
0.967581	0.933178	0.909491		0.862101	0.739486	0.885932		0.789152
0.964097	0.937147	0.919825		0.855677	0.754509	0.878288		0.781873
0.960893	0.94378	0.895067		0.878009	0.747163	0.867341		0.773829
0.960444	0.942501	0.889836		0.873751	0.725597	0.879188		0.805353
0.958316	0.937561	0.918508		0.868446	0.70616	0.855381		0.844264
0.957787	0.943083	0.903937		0.866487	0.749583	0.85138		0.839037
0.958729	0.943695	0.915889		0.862394	0.682336	0.861548		0.833948
0.955523	0.940812	0.937756		0.875325	0.686578	0.875616		0.853229
0.952544	0.940086	0.937571		0.878221	0.775102	0.875981		0.818333
0.953839	0.930873	0.930766		0.906347	0.772507	0.878967		0.787841
0.950718	0.935267	0.927708		0.906574		0.877138
0.948741	0.930291	0.92214		0.916225		0.86778
0.952639	0.927944	0.903433		0.915952		0.879153
0.951072	0.928709	0.918724		0.907297		0.879049
0.945194	0.939772	0.913905		0.90654		0.875681
0.948447	0.927725	0.90548		0.932037		0.88664
0.945442	0.911664	0.9249		0.936577		0.87688
0.94384	0.893437	0.928449		0.930038		0.882611
0.947085	0.890159	0.929658		0.928695		0.887145
0.94633	0.840212	0.923411		0.926634		0.879048
0.949598	0.795705	0.93662		0.923199		0.887122
0.950083	0.781018	0.922233		0.92846		0.86795
0.94921	0.782609	0.937997		0.930991		0.854817
0.946695	0.798975	0.930906		0.92994		0.860679
0.951865	0.781839	0.931583		0.934467		0.881637
0.952042	0.741754	0.933681		0.938878		0.918267
0.952331	0.802116	0.933796		0.944129		0.903215
0.953212	0.808385	0.898788		0.940925		0.913781
0.948943	0.845812	0.896637		0.935682		0.907054
0.944432	0.858548	0.887239		0.93188		0.90987
0.949271	0.863815	0.895054		0.928357		0.91423
0.935611	0.881726	0.882152		0.921302		0.904128
0.936403	0.90992	0.901351		0.927969		0.904853
0.946261	0.920539	0.899689		0.932393		0.91904
0.948221	0.917071	0.900033		0.932412		0.916393
0.952694	0.931138	0.910789		0.931509		0.919932
0.960514	0.927946	0.871189		0.922264		0.91026
0.961424	0.931977	0.871202		0.923354		0.906767
0.96634	0.938064	0.879742		0.931811		0.911567
0.966277	0.932005	0.860303		0.9305		0.907977
0.96779	0.938518	0.865221		0.938859		0.910152
0.968979	0.936531	0.850917		0.941311		0.908435
0.972484	0.933103	0.83736		0.948212		0.910614
0.973673	0.933265	0.838766		0.93333		0.897625
0.971031	0.940183	0.852195		0.923505		0.899933
0.975855	0.948486	0.845455		0.919769		0.89885
0.972852	0.949462	0.820399		0.93105		0.896666
0.974601	0.943761	0.866781		0.935274		0.896971
0.977752	0.942879	0.874094		0.934995		0.899892
0.977215	0.936081	0.832227		0.933101		0.895628
0.978972	0.931678	0.880973		0.939782		0.900277
0.976844	0.938256	0.883117		0.935887		0.903744
0.976802	0.944564	0.884306		0.932598		0.892062
0.975512	0.938158	0.89733		0.933014		0.890535
0.978	0.949776	0.903419		0.930879		0.893491
0.976622	0.950526	0.902014		0.930694		0.89079
0.97868	0.952029	0.898777		0.935024		0.888046
0.977953	0.947215	0.916649		0.933857		0.885473
0.976844	0.942852	0.889425		0.926068		0.889381
0.970464	0.948703	0.878486		0.928402		0.875361
0.971763	0.944481	0.868236		0.908492		0.887367
0.97057	0.941853	0.882379		0.909631		0.899553
0.974497	0.938542	0.890436		0.910432		0.901119
0.972737	0.948339	0.893043		0.919891		0.903557
0.976121	0.943351	0.90471		0.912384		0.892284
0.973481	0.947426	0.911278		0.904077		0.888084
0.973794	0.946035	0.889092		0.90191		0.886412
0.974501	0.947253	0.869032		0.904628		0.886356
0.964868	0.945579	0.86145		0.904751		0.881107
0.965032	0.950325	0.850905		0.902		0.879916
0.96813	0.954242	0.847982		0.902037		0.896137
0.966885	0.953276	0.843719		0.90885		0.894675
0.965534	0.951992	0.83701		0.914679		0.890464
0.965343	0.948593	0.835868		0.903526		0.893568
0.966379	0.95109	0.852333		0.905496		0.894761
0.96821	0.95566	0.857487		0.903123		0.886497
0.968333	0.953655	0.854678		0.90979		0.890364
0.968106	0.953674	0.847722		0.918518		0.907169
0.965412	0.95956	0.861699		0.909819		0.896625
0.965166	0.962699	0.856302		0.918691		0.908487
0.966277	0.968723	0.853819		0.924537		0.906975
0.960129	0.964374	0.862329		0.920835		0.902347
0.965743	0.962248	0.869322		0.915024		0.896932
0.967486	0.958273	0.854278		0.918873		0.904066
0.967996	0.959311	0.853497		0.921854		0.900716
0.969407	0.957394	0.848154		0.923213		0.91631
0.973403	0.951133	0.842623		0.904944		0.909428
0.968852	0.94803	0.823673		0.924588		0.899539
0.967599	0.934817	0.836077		0.920906		0.892774
0.968069	0.922052	0.843573		0.919695		0.883516
0.968746	0.915117	0.820011		0.890509		0.869625
0.964242	0.916238	0.825649		0.872077		0.864158
0.965407	0.902949	0.805976		0.896817		0.849735
0.967931	0.898004	0.766611		0.903163		0.828578
0.972381	0.888581	0.756767		0.912887		0.834452
0.969769	0.894781	0.773762		0.922262		0.84746
0.972243	0.892629	0.758244		0.921656		0.862226
0.975627	0.899049	0.727069		0.925794		0.861416
0.973978	0.894005	0.754778		0.920606		0.878408
0.972134	0.892643	0.730866		0.923672		0.873618
0.973908	0.90185	0.695574		0.920668		0.869605
0.973221	0.901939	0.72494		0.917732		0.8701
0.972692	0.900247	0.72988		0.927677		0.875976
0.970243	0.908038	0.707672		0.928089		0.88844
0.969002	0.906495	0.712251		0.924703		0.876033
0.966276	0.898937	0.761395		0.909114		0.8796
0.967777	0.909935	0.776639		0.91634		0.882936
0.970888	0.908751	0.822079		0.926359		0.895604
0.973013	0.908744	0.796096		0.929436		0.892163
0.975651	0.90602	0.810889		0.922957		0.886463
0.976258	0.915075	0.856305		0.923345		0.886913
0.974722	0.910903	0.840893		0.917137		0.887953
0.970764	0.91464	0.820561		0.914965		0.86645
0.971113	0.916484	0.809063		0.913836		0.876631
0.973584	0.916437	0.852001		0.925384		0.879088
0.971007	0.912663	0.86731		0.93005		0.869452
0.968878	0.911261	0.861104		0.925096		0.867616
0.971292	0.906807	0.89139		0.926705		0.86505
0.974757	0.908014	0.878315		0.924727		0.842009
0.968903	0.905639	0.89074		0.931781		0.853929
0.972111	0.911522	0.8223		0.93285		0.862923
0.971509	0.909759	0.790285		0.93811		0.847055
0.969963	0.920996	0.859689		0.932783		0.884206
0.970066	0.917989	0.890033		0.931172		0.858175
0.970951	0.925478	0.887272		0.931792		0.886207
0.967714	0.923623	0.906533		0.928416		0.889014
0.967496	0.924337	0.922594		0.921202		0.901099
0.96814	0.919818	0.920735		0.928759		0.894848
0.969445	0.929111	0.913293		0.926724		0.897587
0.96713	0.921295	0.914514		0.930434		0.89698
0.969295	0.935307	0.923166		0.947132		0.89038
0.968184	0.938495	0.924146		0.936714		0.883289
0.967739	0.93503	0.92259		0.926664		0.877035
0.968413	0.934014	0.926305		0.944315		0.875393
0.968806	0.929964	0.915173		0.945385		0.87965
0.969708	0.938282	0.907323		0.942347		0.873974
0.970636	0.943718	0.91879		0.94054		0.871631
0.969899	0.947398	0.916352		0.938612		0.865409
0.970889	0.941002	0.91349		0.944855		0.856045
0.971123	0.940806	0.906619		0.946148		0.849617
0.97379	0.941858	0.927896		0.948772		0.837499
0.97089	0.942455	0.919484		0.950717		0.83937
0.973425	0.947312	0.925783		0.951328		0.826601
0.971376	0.94591	0.924061		0.95		0.819476
0.975096	0.935315	0.928337		0.954639		0.814364
0.974787	0.93538	0.925676		0.95031		0.799914
0.972561	0.940189	0.937023		0.954019		0.802389
0.970319	0.934913	0.929917		0.946249		0.798165
0.970251	0.93734	0.926418		0.946634		0.790698
0.971458	0.934364	0.930942		0.937409		0.768568
0.969315	0.946664	0.937902		0.925787		0.770527
0.970919	0.952404	0.938145		0.940429		0.752969
0.972079	0.960826	0.932881		0.927457		0.72234
0.973031	0.965687	0.922826		0.935032		0.734668
0.97204	0.962486	0.924715		0.932161		0.746801
0.971392	0.968239	0.920502		0.919496		0.726229
0.969649	0.967967	0.922798		0.915245		0.72144
0.97022	0.969016	0.930525		0.898958		0.724125
0.970843	0.966713	0.920289		0.865291		0.716005
0.970805	0.968174	0.931289		0.877849		0.731992
0.971125	0.971294	0.928819		0.839924		0.724406
0.971718	0.968351	0.921286		0.851316		0.72115
0.972574	0.967489	0.929063		0.796109		0.726945
0.968929	0.967312	0.932113				0.710677
0.965796	0.968062	0.926202				0.724493
0.9654	0.970146	0.934182				0.699099
0.968094	0.967956	0.931505				0.660449
0.973751	0.970825	0.937319				0.689893
0.969447	0.97019	0.944274				0.685249
0.972112	0.966508	0.938106				0.64225
0.970488	0.970206	0.926447				0.638826
0.972508	0.969461	0.925457				0.6689
0.972407	0.971932	0.921934				0.685809
0.977335	0.974209	0.940963				0.695435
0.978265	0.974472	0.931767				0.664521
0.977978	0.972944	0.939252				0.6419
0.971201	0.972463	0.934664				0.602786
0.977158	0.967827	0.924688				0.605852
0.974893	0.971133	0.93886
0.975461	0.964722	0.925088
0.976376	0.961094	0.919108
0.976583	0.957353	0.923438
0.974891	0.959243	0.920875
0.976183	0.958836	0.92358
0.975475	0.961667	0.929852
0.976523	0.964774	0.914023
0.973043	0.966285	0.937435
0.975089	0.96833	0.931515
0.977007	0.970505	0.945965
0.975921	0.971471	0.936753
0.972844	0.971175	0.918148
0.969285	0.97375	0.905405
0.974737	0.975818	0.896552
0.973537	0.975175	0.910987
0.967405	0.972286	0.91691
0.966015	0.971948	0.92384
0.968609	0.972936	0.930184
0.967013	0.968736	0.94007
0.968715	0.96635	0.925142
0.973002	0.964277	0.934599
0.972202	0.965872	0.946023
0.972905	0.970306	0.928664
0.973911	0.971772	0.935408
0.97237	0.966394	0.932093
0.973021	0.970321	0.902902
0.976264	0.96806	0.912727
0.974524	0.966391	0.907748
0.973318	0.962227	0.911292
0.972991	0.961183	0.890351
0.97515	0.963535	0.875368
0.978094	0.959831	0.855287
0.975168	0.961625	0.858712
0.974139	0.957774	0.853517
0.970545	0.955658	0.861078
0.972039	0.954985	0.889994
0.976279	0.9489	0.886811
0.976556	0.949812	0.861338
0.974433	0.946066	0.887515
0.978169	0.947456	0.851323
0.977432	0.946581	0.832984
0.977548	0.946695	0.839748
0.972047	0.957569	0.802122
0.975284	0.95592	0.843256
0.973889	0.956984	0.804213
0.968885	0.955606	0.7486
0.972305	0.952603	0.719444
0.972994	0.945823
0.966615	0.946539
0.968545	0.953331
0.966016	0.946774
0.965405	0.952056
0.963034	0.960586
0.965579	0.940528
0.968228	0.942273
0.963845	0.927187
0.969792	0.926338
0.969324	0.918131
0.972571	0.916098
0.975283	0.911061
0.973711	0.925566
0.970952	0.926691
0.968186	0.895979
0.967908	0.896037
0.960101	0.896135
0.969214	0.892825
0.968141	0.904019
0.956358	0.874841
0.958029	0.895934
0.957946	0.894543
0.957689	0.883221
0.956566	0.909967
0.955164	0.865462
0.951043	0.863831
0.957404	0.880609
0.96231	0.855833
0.958356	0.852099
0.960403	0.87939
0.960903	0.848363
0.958679	0.883796
0.965362	0.796618
0.958498	0.898895
0.967959	0.918783
0.969238	0.907005
0.969231	0.864848
0.974485	0.853259
0.96626	0.8159
0.967159	0.787949
0.97198	0.802534
0.96805	0.801792
0.968219	0.807777
0.972316	0.746888
0.956958
0.971904
0.960897
0.973028
0.976364
0.97475
0.966082
0.959743
0.956076
0.948141
0.943549
0.944507
0.94816
0.946188
0.919943
0.882769
0.833125
0.809294
0.78976
0.803711
0.786648
0.748733

## Sheet: SI10_b
Isocortex	HPF	OLF	CTXsp	STR	PAL	DORsm	DORpm	HY
0.764854	0.791238	0.682175	0.75431	0.78928	0.842664	0.779333	0.714619	0.725857
0.81311	0.828571	0.781779	0.746909	0.839695	0.832575	0.711891	0.800226	0.710624
0.806584	0.805729	0.702626	0.708987	0.847039	0.761679	0.739195	0.830339	0.713591
0.819125	0.837404	0.7023	0.740761	0.877071	0.741632	0.721777	0.815883	0.732168
0.828829	0.848403	0.747231	0.773017	0.879064	0.769536	0.752047	0.840017	0.741379
0.841108	0.836617	0.751459	0.759166	0.893452	0.747061	0.771829	0.824588	0.767888
0.884593	0.830189	0.759551	0.737707	0.912697	0.761317	0.867135	0.799536	0.715264
0.947475	0.83487	0.815506	0.731399	0.900567	0.762445	0.860804	0.779305	0.689811
0.957506	0.842466	0.793611	0.764204	0.924511	0.776259	0.856523	0.78287	0.759937
0.961245	0.8596	0.828133	0.769154	0.919808	0.756839	0.873211	0.787442	0.738252
0.9718	0.868561	0.818338	0.834526	0.932235	0.78391	0.837514	0.785207	0.674134
0.96269	0.869269	0.808895	0.840704	0.938834	0.789805	0.775335	0.761109	0.684695
0.961133	0.85113	0.820083	0.85976	0.917497	0.765156	0.795867	0.700488	0.714558
0.969509	0.877246	0.804064	0.870605	0.92391	0.796435	0.780854	0.643113	0.733042
0.974095	0.888609	0.791244	0.880067	0.947582	0.828579	0.814518	0.595455	0.782573
0.974101	0.87666	0.798841	0.894217	0.937392	0.819184	0.835956	0.736007	0.804353
0.976309	0.893495	0.807293	0.909231	0.95434	0.821297	0.846447	0.756034	0.811893
0.96819	0.906342	0.813356	0.908227	0.946466	0.797027	0.825342	0.705187	0.8343
0.975586	0.900572	0.861302	0.914778	0.943803	0.847339	0.823339	0.58626	0.842913
0.979882	0.884892	0.886318	0.904301	0.915064	0.848583	0.834312	0.554825	0.835352
0.98028	0.889952	0.892282	0.897434	0.939323	0.874007	0.833728	0.584888	0.843065
0.976799	0.90384	0.899325	0.889671	0.941149	0.85823	0.806455	0.630957	0.872041
0.980843	0.892624	0.916549	0.905874	0.95065	0.800933	0.815996	0.577997	0.874666
0.980637	0.891357	0.91385	0.894075	0.944161	0.866013	0.813484	0.522141	0.86184
0.980054	0.896909	0.920215	0.912496	0.946721	0.853536	0.79006	0.64592	0.846007
0.983224	0.877936	0.910905	0.917861	0.943531	0.901001	0.734615	0.741272	0.864807
0.980783	0.894339	0.914475	0.911436	0.942247	0.863582	0.774145	0.787486	0.85518
0.984909	0.894505	0.921235	0.904283	0.941028	0.864833	0.819849	0.840663	0.859236
0.979175	0.884816	0.924382	0.89517	0.942748	0.818404	0.859032	0.863366	0.847082
0.979492	0.910845	0.909801	0.880164	0.945727	0.818466	0.875977	0.881566	0.847472
0.976528	0.906892	0.914877	0.87284	0.910495	0.787676	0.869483	0.886862	0.849519
0.977638	0.906636	0.912962	0.880753	0.91229	0.816824	0.895711	0.875952	0.845109
0.974454	0.895102	0.905481	0.847766	0.93208	0.817253	0.888889	0.88203	0.833299
0.977689	0.896237	0.92332	0.851084	0.923243	0.805556	0.896929	0.881563	0.845411
0.96843	0.904205	0.9224	0.882766	0.912835	0.837729	0.868888	0.873489	0.850809
0.969444	0.879659	0.920989	0.875	0.910815	0.831023	0.848419	0.86673	0.844247
0.960146	0.87253	0.928693	0.872042	0.908953	0.821066	0.857342	0.86975	0.832947
0.946358	0.87628	0.909608	0.886915	0.921017	0.809018	0.848328	0.855858	0.835901
0.960926	0.869512	0.908741	0.889083	0.923932	0.847339	0.865936	0.875309	0.793761
0.961839	0.862325	0.892732	0.882327	0.92193	0.833979	0.856413	0.878408	0.799778
0.959127	0.864907	0.926542	0.894796	0.920349	0.807083	0.854772	0.864321	0.809109
0.94944	0.860381	0.917807	0.89314	0.93403	0.847859	0.875747	0.872196	0.833099
0.943966	0.861795	0.922033	0.88517	0.933196	0.847644	0.872254	0.873463	0.833366
0.932188	0.88456	0.922067	0.892599	0.928163	0.856537	0.837117	0.872262	0.848101
0.940791	0.903444	0.940418	0.893834	0.922349	0.863236	0.850304	0.848757	0.861899
0.943626	0.897052	0.936754	0.888601	0.923279	0.878363	0.840685	0.82972	0.864273
0.946153	0.898795	0.938072	0.871473	0.924424	0.877129	0.817834	0.83886	0.872518
0.9509	0.903262	0.944294	0.892376	0.928891	0.855148	0.812785	0.840437	0.882793
0.959639	0.90253	0.941396	0.884029	0.9249	0.85136	0.830358	0.833728	0.883141
0.948277	0.909479	0.940746	0.866291	0.918332	0.872755	0.822811	0.82144	0.887835
0.956889	0.914312	0.937408	0.859151	0.905293	0.884218	0.84082	0.840804	0.883149
0.961109	0.910909	0.946318	0.83486	0.904108	0.896741	0.840573	0.858033	0.886721
0.9619	0.917502	0.940642	0.831204	0.911536	0.91624	0.843073	0.839658	0.900115
0.965302	0.907202	0.936278	0.83465	0.916494	0.888267	0.865748	0.855679	0.912838
0.969641	0.912098	0.942918	0.840052	0.921513	0.900339	0.83584	0.834243	0.912564
0.966803	0.918163	0.943671	0.839968	0.929657	0.908374	0.840321	0.814435	0.911618
0.958077	0.918929	0.940835	0.850989	0.923615	0.9	0.834227	0.81951	0.915472
0.962111	0.902395	0.937668	0.8188	0.92949	0.895268	0.819067	0.805354	0.920145
0.953458	0.879584	0.927052	0.84575	0.931511	0.891822	0.824473	0.853584	0.921307
0.961075	0.884582	0.934214	0.838746	0.932565	0.880157	0.800944	0.84381	0.906811
0.962969	0.882961	0.931421	0.823722	0.936638	0.885293	0.824355	0.846366	0.910394
0.954376	0.892085	0.936896	0.850426	0.926539	0.850392	0.815882	0.854748	0.911661
0.956371	0.904446	0.931314	0.855465	0.928463	0.844251	0.825657	0.834335	0.910873
0.958423	0.909037	0.92736	0.839349	0.928775	0.822418	0.830799	0.852788	0.90823
0.961134	0.895714	0.935961	0.843238	0.928998	0.809894	0.815776	0.837798	0.90398
0.960321	0.908855	0.930665	0.835624	0.929017	0.822575	0.848005	0.843174	0.898945
0.968942	0.89867	0.927608	0.786084	0.921184	0.835524	0.84734	0.848805	0.903084
0.964532	0.901349	0.941176	0.809065	0.924142	0.820817	0.861282	0.845471	0.902367
0.964415	0.884778	0.93819	0.798895	0.92794	0.833084	0.856813	0.859863	0.910487
0.971821	0.894939	0.929806	0.786257	0.926597	0.786584	0.857099	0.864975	0.902999
0.972857	0.887666	0.935255	0.72265	0.929557	0.764688	0.846096	0.869035	0.922068
0.96668	0.877098	0.932278	0.798481	0.898565	0.780723	0.836335	0.875505	0.924538
0.972737	0.877014	0.931093	0.758435	0.918754	0.757731	0.819714	0.870896	0.928892
0.976622	0.883062	0.936614	0.615899	0.935704	0.753902	0.837923	0.831172	0.936275
0.973998	0.892448	0.932871	0.63199	0.938036	0.720832	0.835897	0.832275	0.929075
0.971699	0.896879	0.928388	0.737142	0.928919	0.717988	0.756189	0.858263	0.919609
0.972417	0.88667	0.915475	0.738784	0.906791	0.680242	0.751301	0.882043	0.918342
0.976723	0.888663	0.928468	0.730818	0.93748	0.668182	0.782722	0.893722	0.908957
0.97264	0.872689	0.929581	0.623735	0.928215	0.661133	0.839355	0.894072	0.919411
0.971132	0.897346	0.92268	0.760605	0.925524	0.633602	0.836783	0.888922	0.902214
0.974707	0.905695	0.928754	0.722604	0.92451	0.667943	0.815672	0.907161	0.893926
0.974818	0.889068	0.929356	0.699171	0.929451	0.685696	0.817267	0.889323	0.89554
0.976419	0.885358	0.930552	0.651026	0.930428	0.706844	0.800837	0.890784	0.887812
0.974151	0.890523	0.934828	0.674764	0.925148	0.705658	0.811785	0.903455	0.889845
0.971228	0.884782	0.935766	0.691117	0.914475	0.732135	0.847428	0.891351	0.890098
0.97469	0.89275	0.919017	0.666851	0.925202	0.751305	0.85134	0.875908	0.856966
0.974995	0.877423	0.933113	0.65812	0.912895	0.718935	0.765988	0.852173	0.810167
0.978154	0.883024	0.920504	0.689858	0.906526	0.700311	0.73046	0.876422	0.771854
0.974347	0.866271	0.92744	0.666462	0.911521	0.716127	0.677758	0.87646	0.664567
0.973006	0.874216	0.917234	0.670861	0.906959	0.717015	0.739074	0.87904	0.65005
0.975791	0.883092	0.922874	0.706434	0.909066	0.747881	0.777899	0.863975	0.76638
0.974577	0.900989	0.928007	0.667622	0.912503	0.718177	0.846851	0.856809	0.822579
0.972979	0.883129	0.926383	0.635392	0.911109	0.713827	0.841065	0.85804	0.860002
0.973741	0.873943	0.935184	0.638282	0.902579	0.731073	0.834774	0.831327	0.815973
0.971187	0.871274	0.922206	0.645751	0.898895	0.657846	0.826279	0.813629	0.854608
0.969775	0.857009	0.917995	0.573702	0.906611	0.665058	0.802572	0.843131	0.908903
0.973286	0.84249	0.920599	0.559616	0.914419	0.670471	0.789215	0.838766	0.918165
0.968924	0.840903	0.924489	0.619329	0.912141	0.691041	0.805556	0.851852	0.917361
0.96958	0.860262	0.917459	0.59095	0.918513	0.661529	0.777281	0.860619	0.926388
0.978896	0.832479	0.920607	0.557069	0.925535	0.695573	0.784779	0.833241	0.929572
0.979413	0.843618	0.916394	0.573936	0.918761	0.633074	0.763059	0.832776	0.92874
0.974708	0.833722	0.924979	0.614097	0.911522	0.665415	0.831251	0.839922	0.933192
0.973754	0.86672	0.902633	0.635304	0.913037	0.671758	0.823858	0.824349	0.935608
0.976879	0.853331	0.852255	0.540105	0.929651	0.658485	0.801005	0.837987	0.93772
0.977505	0.867657	0.877013	0.572411	0.933645	0.687741	0.814958	0.823506	0.934998
0.977094	0.854122	0.898465	0.615385	0.939135	0.692189	0.762204	0.821783	0.93203
0.97591	0.866239	0.907016	0.634833	0.938047	0.724917	0.801975	0.898971	0.931302
0.977185	0.860839	0.867648	0.547992	0.932028	0.746546	0.832246	0.906162	0.924932
0.976936	0.868125	0.842658	0.650772	0.931959	0.730031	0.842266	0.890066	0.92392
0.976958	0.864951	0.886525	0.704122	0.936322	0.718689	0.790353	0.845482	0.914404
0.976722	0.866296	0.852605	0.665356	0.93307	0.710718	0.805765	0.825957	0.913254
0.97951	0.860265	0.828495	0.659029	0.934966	0.722998	0.817708	0.807291	0.911958
0.979236	0.858901	0.824774	0.741294	0.938323	0.649675	0.815093	0.789133	0.90294
0.977573	0.856654	0.846305	0.72665	0.938579	0.713384	0.827267	0.820734	0.903017
0.975119	0.860684	0.859516	0.733746	0.941527	0.689768	0.828865	0.828007	0.904724
0.977795	0.868159	0.813146	0.705557	0.931775	0.610938	0.851831	0.875269	0.913972
0.972395	0.871064	0.790777	0.726019	0.929953	0.615341	0.844156	0.886263	0.921705
0.97539	0.863399	0.825755	0.736019	0.921469	0.665557	0.837275	0.883217	0.91939
0.9772	0.882828	0.77931	0.713667	0.927569	0.714752	0.840565	0.898101	0.931586
0.976259	0.883564	0.789213	0.752599	0.934886	0.759144	0.847799	0.891466	0.929385
0.973095	0.874456	0.760677	0.683125	0.943778	0.819438	0.870125	0.905524	0.93019
0.974413	0.878346	0.726407	0.705945	0.943344	0.855717	0.836614	0.885197	0.921005
0.972581	0.881375	0.760183	0.705339	0.940833	0.79122	0.855818	0.891328	0.91597
0.976596	0.880823	0.756455	0.678788	0.931548	0.805156	0.865788	0.865208	0.91977
0.973214	0.889086	0.710476	0.724263	0.931639	0.82672	0.867222	0.867145	0.910482
0.976393	0.897488	0.686207	0.685158	0.923091	0.781331	0.844968	0.867302	0.918215
0.972259	0.890107	0.715459	0.719836	0.924116	0.759143	0.846008	0.883372	0.910345
0.970665	0.898568	0.719178	0.710612	0.936503	0.766536	0.826937	0.880374	0.899528
0.969592	0.89859	0.791667	0.725154	0.928983	0.815706	0.815656	0.906385	0.897586
0.972389	0.901863	0.737562	0.675384	0.931475	0.794659	0.813956	0.932743	0.897334
0.97347	0.907029	0.694075	0.729846	0.92631	0.769689	0.865044	0.9276	0.895074
0.97511	0.921167	0.74652	0.760258	0.92083	0.752473	0.828192	0.913906	0.879577
0.97168	0.93012	0.756932	0.768009	0.927878	0.684501	0.836746	0.901515	0.873942
0.971131	0.940504	0.747549	0.783732	0.931432	0.720183	0.820923	0.865048	0.864507
0.971206	0.953696	0.731614	0.813043	0.934041	0.735886	0.818426	0.900473	0.860949
0.972397	0.955777	0.778634	0.813426	0.937851	0.728562	0.824042	0.889717	0.860556
0.970464	0.960491	0.795376	0.836769	0.943778	0.767318	0.839937	0.886938	0.88173
0.969498	0.96335	0.752886	0.826589	0.938116	0.76578	0.855506	0.86739	0.880716
0.969475	0.964113	0.762806	0.847341	0.934965	0.77228	0.856127	0.843995	0.864635
0.971324	0.964531	0.783564	0.810468	0.932411	0.774311	0.871264	0.82384	0.849137
0.971347	0.967294	0.75431	0.827052	0.93145	0.750444	0.875478	0.809036	0.8234
0.96924	0.969662	0.755629	0.818884	0.928428	0.741061	0.890145	0.806435	0.836473
0.967779	0.968142	0.801412	0.806326	0.928249	0.749212	0.887458	0.838934	0.846403
0.972326	0.961422	0.826337	0.799069	0.930531	0.707982	0.890521	0.837264	0.835216
0.969517	0.96397	0.814589	0.824429	0.933543	0.694244	0.880728	0.825875	0.823453
0.970464	0.958076	0.839105	0.806448	0.934947	0.68	0.889549	0.809478	0.837285
0.973317	0.962083	0.841173	0.805305	0.941502	0.773903	0.880549	0.833234	0.841616
0.976522	0.967064	0.824422	0.802838	0.939253	0.795605	0.884116	0.834123	0.841191
0.975763	0.962203	0.846216	0.83319	0.913185	0.777941	0.845445	0.845722	0.876001
0.969634	0.956322	0.847227	0.815595	0.914734	0.734545	0.80583	0.849048	0.876272
0.970441	0.959419	0.8636	0.826277	0.918785	0.708302	0.824017	0.870855	0.871773
0.968887	0.963717	0.864528	0.849556	0.919417	0.769178	0.795981	0.828776	0.882337
0.971601	0.960514	0.873634	0.859867	0.908137	0.763967	0.784069	0.8379	0.8777
0.968248	0.959757	0.868968	0.854837	0.90468	0.74554	0.797791	0.842733	0.876409
0.968198	0.955438	0.861722	0.861973	0.878487	0.725899	0.809013	0.847759	0.876973
0.965896	0.957187	0.86645	0.854702	0.875989	0.755298	0.807138	0.846594	0.875504
0.96564	0.956555	0.875457	0.861348	0.860768	0.721243	0.814357	0.834511	0.849031
0.968491	0.957477	0.857731	0.853372	0.870958	0.720565	0.839395	0.859983	0.867481
0.967917	0.962212	0.860256	0.876766	0.873586	0.740236	0.839281	0.874187	0.866148
0.967244	0.960429	0.854446	0.868939	0.885383	0.752515	0.836829	0.901314	0.856916
0.96567	0.951477	0.845443	0.883111	0.888656	0.698217	0.84479	0.884506	0.858432
0.964768	0.949664	0.824891	0.886383	0.864536	0.762237	0.862362	0.914686	0.845822
0.966905	0.951695	0.827559	0.886396	0.863968	0.747516	0.860161	0.914654	0.824661
0.963801	0.951588	0.834669	0.869171	0.877236	0.716466	0.854273	0.917414	0.801409
0.966982	0.949527	0.839099	0.875437	0.904604	0.677494	0.846983	0.898726	0.792065
0.966065	0.950059	0.8467	0.882002	0.903308	0.69253	0.875534	0.878159	0.783512
0.964641	0.955676	0.854881	0.885182	0.906017	0.658907	0.84884	0.869121	0.78048
0.96454	0.953975	0.861873	0.879724	0.908167	0.662193	0.845201	0.863181	0.737173
0.968637	0.952707	0.882226	0.884033	0.904937	0.705975	0.811249	0.848874	0.700741
0.968402	0.952964	0.912493	0.900232	0.914319	0.70021	0.820053	0.86302	0.716372
0.967975	0.953833	0.898672	0.89847	0.911238	0.738088	0.820914	0.852327	0.707217
0.968973	0.954288	0.888691	0.896286	0.904565	0.752989	0.835766	0.886367	0.716807
0.970465	0.944598	0.886433	0.894289	0.906818	0.708518	0.818195	0.863815	0.733491
0.968709	0.949392	0.879811	0.91303	0.895184	0.718229	0.815668	0.828117	0.76398
0.974768	0.952391	0.871876	0.901558	0.903345	0.725526	0.788156	0.842878	0.720892
0.971757	0.954388	0.88	0.887673	0.897562	0.790444	0.817325	0.818814	0.728125
0.97054	0.94738	0.885758	0.882844	0.896513	0.800304	0.782264	0.833863	0.722658
0.973764	0.947905	0.90603	0.867677	0.904037	0.777179	0.760721	0.841702	0.747058
0.976258	0.933666	0.883227	0.877053	0.89388	0.793083	0.752818	0.841361	0.668095
0.972736	0.928633	0.900668	0.878166	0.897449	0.773509	0.712388	0.817537	0.673891
0.972384	0.934048	0.905966	0.854755	0.8943	0.76294	0.716246	0.83337	0.705749
0.976869	0.931102	0.896582	0.847928	0.889373	0.785459	0.769286	0.830881	0.692403
0.978792	0.933061	0.878488	0.838125	0.899386	0.798044		0.826981	0.719143
0.980309	0.925677	0.874606	0.85403	0.889195	0.804479		0.839146	0.645738
0.976673	0.92745	0.864913	0.873588	0.901515	0.83043		0.86473	0.533723
0.972034	0.925327	0.811137	0.870557	0.902469	0.833287		0.873541	0.710116
0.969556	0.919016	0.851365	0.871317	0.899164	0.83224		0.853552	0.616869
0.965571	0.912641	0.848161	0.843306	0.900192	0.856864		0.86058	0.59932
0.97254	0.894105	0.796469	0.830402	0.906955	0.833556		0.844373	0.617509
0.975065	0.899108	0.829994	0.831364	0.900084	0.833924		0.845754	0.56491
0.974453	0.898981	0.82627	0.827887	0.902031	0.812029		0.858302	0.588776
0.97671	0.86939	0.816683	0.816709	0.909821	0.82077		0.838596
0.978655	0.857065	0.815748	0.805558	0.88904	0.82042		0.844286
0.977187	0.870672	0.82936	0.800702	0.892489	0.819213		0.851255
0.979164	0.857621	0.844624	0.769702	0.86899	0.835878		0.85437
0.981612	0.848911	0.845377	0.739953	0.839104	0.853115		0.823464
0.976376	0.739595	0.871105	0.686898	0.824251	0.850972		0.838129
0.97487	0.695652	0.866092	0.671405	0.766417	0.841142		0.844296
0.973896	0.684678	0.862724	0.682432	0.793439	0.838268		0.855789
0.972376	0.638015	0.905505	0.675464	0.780999	0.856873		0.855801
0.969854	0.614721	0.890869	0.678754	0.779884	0.848882		0.842584
0.971286	0.782631	0.889422	0.677273	0.719281	0.8482		0.830975
0.975021	0.711111	0.883591	0.674569	0.712125	0.840441		0.834344
0.973888	0.754034	0.866595	0.689588	0.626243	0.831251		0.832599
0.973675	0.777805	0.874688	0.730282	0.662621	0.846082		0.853016
0.976304	0.786619	0.865619	0.666281	0.725814	0.861731		0.840593
0.97843	0.751018	0.877658	0.646417	0.782815	0.854161		0.851018
0.975783	0.777262	0.879441		0.762593	0.880498		0.87014
0.973655	0.828717	0.926026		0.765344	0.858577		0.877092
0.97558	0.875646	0.925673		0.782053	0.844621		0.885706
0.973194	0.869846	0.927592		0.781441	0.81077		0.891064
0.967312	0.873086	0.92342		0.803252	0.785173		0.890266
0.97306	0.886943	0.922443		0.823569	0.818891		0.879274
0.972479	0.915485	0.911962		0.824007	0.764522		0.875837
0.969558	0.922282	0.932311		0.820492	0.820442		0.870865
0.972212	0.929191	0.917958		0.801261	0.714551		0.866578
0.9705	0.930268	0.918939		0.852884	0.703709		0.856521
0.96964	0.936652	0.923823		0.861804	0.711953		0.823826
0.96924	0.93502	0.921409		0.866554	0.678413		0.812128
0.967793	0.940996	0.895453		0.873353	0.705247		0.711909
0.966589	0.940191	0.904002		0.86803	0.645225		0.707459
0.966944	0.939896	0.910369		0.859595	0.664203		0.638652
0.968919	0.942016	0.888477		0.874205	0.697366		0.59367
0.967323	0.938516	0.904482		0.89634	0.681544		0.648821
0.965601	0.942716	0.920595		0.882043	0.693098		0.629644
0.977554	0.941699	0.915401		0.884912	0.666938		0.659966
0.97433	0.933973	0.925527		0.88724	0.665955		0.622476
0.973672	0.932641	0.92896		0.889914	0.709936		0.566856
0.973803	0.940912	0.902268		0.880629	0.732984		0.60708
0.96815	0.945263	0.903579		0.876148	0.701266		0.63949
0.969458	0.94129	0.90279		0.870389	0.723077		0.733309
0.96594	0.944338	0.875619		0.875912	0.733869		0.756962
0.968524	0.946483	0.862555		0.872686	0.714519		0.779164
0.965884	0.954559	0.898487		0.877711	0.739681		0.777652
0.974032	0.956469	0.921746		0.878709	0.745398		0.7978
0.974936	0.955008	0.914154		0.876974	0.722545		0.791216
0.976692	0.957813	0.875556		0.881857	0.731895		0.812158
0.973216	0.960387	0.900196		0.887616	0.765996		0.850558
0.973255	0.959484	0.893427		0.875447	0.777745		0.824522
0.972302	0.952264	0.819823		0.882454	0.786603		0.855441
0.97404	0.952624	0.747516		0.896512	0.77628		0.813289
0.971585	0.958364	0.690891		0.902772	0.757668		0.804515
0.972664	0.960626	0.792893		0.900917	0.782123		0.681709
0.974	0.95875	0.71883		0.908935	0.752241
0.97466	0.958477	0.724038		0.892536	0.784028
0.969649	0.966322	0.765285		0.873993	0.787519
0.970807	0.966642	0.845619		0.871345	0.780431
0.974449	0.968741	0.837405		0.864647	0.788927
0.968915	0.969096	0.829436		0.878081	0.778047
0.969345	0.969277	0.808775		0.884993	0.711626
0.971149	0.969426	0.828518		0.892746	0.670153
0.966615	0.970199	0.853258		0.872795	0.63221
0.964089	0.976056	0.839749		0.863873
0.963212	0.975965	0.876796		0.888637
0.96074	0.976766	0.894287		0.913576
0.959835	0.971574	0.8918		0.923951
0.95535	0.970857	0.90205		0.927733
0.949236	0.972794	0.913625		0.929557
0.944479	0.968833	0.914866		0.929738
0.947373	0.971088	0.916199		0.935402
0.945027	0.969022	0.893225		0.932236
0.941588	0.962066	0.902916		0.937282
0.938579	0.965563	0.911805		0.935731
0.947127	0.968593	0.922249		0.934389
0.949184	0.964637	0.911785		0.931188
0.952895	0.971043	0.908829		0.936735
0.954517	0.966262	0.91833		0.93601
0.953321	0.971521	0.90589		0.925673
0.955442	0.968732	0.922723		0.936087
0.9514	0.971429	0.89672		0.940163
0.955016	0.966063	0.918622		0.940152
0.954348	0.968195	0.917405		0.939817
0.954268	0.96438	0.915206		0.943996
0.951303	0.953918	0.933836		0.939059
0.951649	0.966496	0.919957		0.939246
0.946939	0.960309	0.920482		0.941904
0.949516	0.943905	0.909358		0.939631
0.952973	0.938195	0.909391		0.944019
0.951018	0.932606	0.896901		0.943915
0.95891	0.910064	0.871593		0.932791
0.961948	0.899139	0.892052		0.932351
0.955228	0.896474	0.867716		0.931997
0.956423	0.887649	0.857749		0.935986
0.959737	0.882577	0.882525		0.933069
0.957672	0.892827	0.874712		0.940721
0.960229	0.879707	0.879711		0.946232
0.959469	0.886149	0.891995		0.939986
0.959762	0.888074	0.858172		0.938612
0.961164	0.885751	0.833841		0.946549
0.961368	0.885841	0.817579		0.945825
0.961074	0.889515	0.782254		0.942415
0.961261	0.884885	0.781154		0.946826
0.965555	0.895088	0.765652		0.94501
0.963827	0.89897	0.793715		0.942061
0.967316	0.894669	0.789328		0.941906
0.963411	0.899049	0.817		0.939219
0.972643	0.904291	0.806501		0.935344
0.971578	0.90987	0.863734		0.930737
0.970862	0.900896	0.893581		0.925679
0.973697	0.906298	0.858446		0.928499
0.969835	0.902302	0.835007		0.931502
0.97089	0.878278	0.834395		0.932787
0.969698	0.873307	0.848412		0.923041
0.97048	0.865626	0.863197		0.919326
0.973051	0.85759	0.868511		0.921876
0.97036	0.853777	0.878921		0.909682
0.972803	0.868421	0.858731		0.919132
0.967259	0.85945	0.880889		0.925308
0.963725	0.867311	0.899504		0.922215
0.973835	0.873736	0.904902		0.922479
0.971352	0.861212	0.882863		0.925865
0.970697	0.852856	0.876712		0.933022
0.970731	0.86533	0.863234		0.934996
0.966834	0.886707	0.834337		0.934069
0.969954	0.879518	0.817584		0.939777
0.967248	0.86629	0.795291		0.934636
0.965237	0.877415	0.822171		0.937757
0.966302	0.873559	0.808345		0.9336
0.968972	0.867366	0.830276		0.927688
0.96827	0.873706	0.816073		0.932713
0.965712	0.895555	0.830933		0.926355
0.968592	0.881525	0.800812		0.931925
0.967013	0.887732	0.816855		0.916756
0.973565	0.875411	0.822111		0.915956
0.974431	0.895014	0.817153		0.919998
0.97378	0.894486	0.823647		0.922293
0.969844	0.880801	0.854453		0.919129
0.966302	0.87302	0.823734		0.924402
0.968035	0.886819	0.830453		0.928563
0.972753	0.900297	0.851181		0.929309
0.971422	0.903141	0.84697		0.928256
0.970608	0.908367	0.878112		0.92802
0.97095	0.917711	0.839772		0.930164
0.973455	0.918733	0.849402		0.926517
0.975016	0.91637	0.842661		0.939797
0.974056	0.922133	0.785173		0.945987
0.971296	0.921191	0.790236		0.941471
0.969131	0.911359	0.837742		0.93673
0.97291	0.919996	0.8234		0.934122
0.968898	0.908018	0.838101		0.93133
0.965822	0.910734	0.828767		0.931739
0.962275	0.917369	0.81344		0.927584
0.963173	0.925118	0.817506		0.923834
0.963158	0.902694	0.847211		0.927446
0.966049	0.908822	0.831254		0.909838
0.967479	0.912797	0.850294		0.913289
0.965829	0.922395	0.835201		0.911636
0.964865	0.927931	0.831067		0.903168
0.963239	0.910893	0.841483		0.892754
0.96447	0.910167	0.849748		0.909238
0.965136	0.914043	0.83319		0.908533
0.963343	0.928165	0.823563		0.907614
0.963907	0.938936	0.832009		0.912809
0.962606	0.926223	0.814426		0.918035
0.967852	0.943489	0.787988		0.909278
0.967665	0.92207	0.817261		0.915334
0.966918	0.916926	0.804398		0.909091
0.968904	0.926132	0.820551		0.910575
0.967508	0.927314	0.81224		0.913466
0.965591	0.926389	0.83785		0.897234
0.968683	0.922252	0.826559		0.893455
0.962983	0.939769	0.856189		0.8887
0.957832	0.943396	0.854035		0.877741
0.966244	0.948632	0.858322		0.886796
0.963658	0.940768	0.862655		0.886981
0.966741	0.923727	0.850927		0.898235
0.965938	0.924081	0.883178		0.898274
0.965491	0.908424	0.873228		0.897774
0.964032	0.907717	0.854275		0.896424
0.96676	0.908235	0.825934		0.904499
0.968645	0.92635	0.845557		0.908044
0.965587	0.931892	0.81091		0.90942
0.966561	0.930533	0.819164		0.909359
0.968645	0.916361	0.808948		0.915041
0.970386	0.923209	0.802619		0.922213
0.968275	0.922409	0.820602		0.923322
0.966081	0.931423	0.821603		0.917657
0.966661	0.928593	0.846826		0.915441
0.966274	0.928033	0.841148		0.924785
0.96748	0.92122	0.862535		0.930024
0.966636	0.934206	0.847638		0.931172
0.970551	0.933632	0.876777		0.937754
0.970649	0.930719	0.889131		0.946495
0.971963	0.924042	0.877179		0.945767
0.971399	0.920267	0.871994		0.937943
0.972886	0.918243	0.885703		0.944611
0.96997	0.933333	0.906066		0.941908
0.971676	0.934211	0.901292		0.927393
0.971795	0.924994	0.894801		0.959698
0.972955	0.915805	0.921107		0.9508
0.971142	0.930263	0.90319		0.944398
0.974219	0.927379	0.932451		0.938684
0.976042	0.930265	0.925931		0.949477
0.976919	0.925305	0.917933		0.951798
0.974364	0.920811	0.916243		0.950798
0.972851	0.931169	0.934958		0.951294
0.976951	0.939616	0.920274		0.936767
0.974868	0.933852	0.920859		0.941535
0.971592	0.924304	0.924688		0.942364
0.973886	0.903086	0.932357		0.926694
0.971182	0.914621	0.91916		0.92443
0.971852	0.907741	0.918142		0.909956
0.973105	0.927658	0.922843		0.902379
0.974753	0.932416	0.924152		0.889415
0.972886	0.915247	0.924936		0.898934
0.975249	0.937312	0.922117		0.901801
0.975057	0.917874	0.907448		0.856369
0.976979	0.927772	0.905196		0.832345
0.978538	0.937517	0.89967		0.842788
0.974253	0.936048	0.921598		0.797048
0.971547	0.908172	0.912624		0.746095
0.972582	0.878843	0.911485		0.716601
0.975096	0.884176	0.929444		0.716473
0.975139	0.866504	0.927466
0.971344	0.860997	0.92788
0.976675	0.860294	0.930071
0.970753	0.866696	0.932526
0.97436		0.921673
0.974097		0.912174
0.975559		0.920303
0.974311		0.911984
0.975411		0.912168
0.974367		0.907467
0.974455		0.914858
0.977505		0.928311
0.977372		0.915288
0.97323		0.910728
0.974172		0.898869
0.970641		0.884064
0.97385		0.898451
0.974457		0.895429
0.975343		0.888735
0.974476		0.867925
0.971661		0.860526
0.969531		0.872659
0.971583		0.891967
0.973642		0.895458
0.972987		0.890955
0.974835		0.891811
0.972359		0.899439
0.97344		0.906915
0.97417		0.88964
0.972184		0.861734
0.970569		0.891956
0.964783		0.898449
0.967347		0.909177
0.965596		0.90696
0.96845		0.900916
0.968159		0.893959
0.96759		0.896943
0.96858		0.875225
0.967365		0.873526
0.967073		0.892164
0.963235		0.905471
0.961984		0.910635
0.967202		0.933315
0.965893		0.939072
0.96849		0.929909
0.963676		0.918086
0.962996		0.93364
0.95909		0.90107
0.959619		0.896349
0.959217		0.89715
0.959077		0.899937
0.957807		0.890409
0.959768		0.907042
0.962964		0.899939
0.961025		0.892188
0.951928		0.91103
0.967363		0.903641
0.969824		0.89964
0.973737		0.902099
0.975072		0.879417
0.979549		0.839061
0.976825		0.850292
0.977427		0.894997
0.968802		0.866753
0.964764		0.850978
0.965175		0.841523
0.966194		0.842067
0.962008		0.836255
0.96647		0.815929
0.969905		0.830126
0.961064		0.723077
0.953065		0.695312
0.9578		0.771484
0.949949		0.812113
0.953651		0.787476
0.947457		0.80104
0.945406
0.947376
0.949533
0.946622
0.942865
0.946422
0.94496
0.945395
0.94727
0.945175
0.943606
0.933326
0.942571
0.934181
0.926035
0.929229
0.927876
0.92496
0.922853
0.929275
0.927709
0.929239
0.913964
0.923651
0.92415
0.935587
0.933898
0.926457
0.933219
0.931258
0.93295
0.941643
0.917935
0.919408
0.927443
0.92075
0.921151
0.927978
0.933115
0.929647
0.930121
0.913575
0.908159
0.853698
0.819303
0.86047
0.829978
0.879406

## Sheet: SI10_c
DORsm	DORpm	HY	MBmot	MBsta	P-sen	P-mot	P-sat
0.747988	0.72	0.836484	0.873373	0.75407	0.815843	0.628261	0.712453
0.824848	0.766433	0.842438	0.908358	0.882697	0.818295	0.662797	0.705389
0.809578	0.706776	0.882733	0.882943	0.815385	0.826712	0.679052	0.751368
0.801503	0.831098	0.885676	0.894813	0.792521	0.831688	0.682498	0.757293
0.800324	0.821136	0.854468	0.868951	0.801788	0.832527	0.727685	0.793651
0.791063	0.840586	0.835834	0.8548	0.872984	0.839709	0.761379	0.784761
0.803969	0.834363	0.828062	0.856306	0.834038	0.823036	0.798749	0.815599
0.811362	0.788651	0.788345	0.846534	0.808942	0.816752	0.822307	0.854667
0.832355	0.792957	0.790061	0.825818	0.811271	0.838014	0.809906	0.869004
0.842063	0.796948	0.800428	0.83437	0.803014	0.832603	0.753819	0.863274
0.872595	0.789911	0.824526	0.834119	0.770998	0.827559	0.792687	0.85968
0.871427	0.795535	0.861868	0.832493	0.746962	0.82277	0.819767	0.856429
0.866426	0.771698	0.877193	0.8794	0.762586	0.814771	0.833972	0.855022
0.862177	0.727423	0.889485	0.879504	0.770837	0.793271	0.861859	0.874419
0.86758	0.71851	0.864161	0.86419	0.77171	0.749618	0.82583	0.877423
0.871623	0.665123	0.840467	0.841367	0.766292	0.743499	0.77989	0.873219
0.885407	0.645423	0.86419	0.869755	0.765232	0.756361	0.795016	0.891343
0.875396	0.720402	0.864696	0.848314	0.802359	0.766747	0.817716	0.902465
0.871114	0.617464	0.873532	0.8494	0.815989	0.769584	0.811277	0.904369
0.87746	0.646582	0.860884	0.86576	0.869795	0.77716	0.843502	0.906826
0.895966	0.685887	0.833147	0.869453	0.863104	0.807565	0.816228	0.916591
0.894102	0.720441	0.87516	0.857085	0.88466	0.724987	0.830299	0.922323
0.889961	0.708605	0.833376	0.864572	0.884202	0.737819	0.817902	0.919622
0.892045	0.702347	0.869688	0.851085	0.848485	0.715451	0.827811	0.924591
0.887461	0.716174	0.862037	0.843339	0.808685	0.713509	0.826745	0.912984
0.86619	0.70075	0.850694	0.850084	0.802778	0.778908	0.844959	0.921532
0.869221	0.682619	0.80936	0.867998	0.79687	0.787934	0.83737	0.926283
0.856237	0.695099	0.816442	0.869894	0.841038	0.804644	0.836133	0.915545
0.849309	0.696643	0.832393	0.881117	0.896791	0.823636	0.854382	0.914332
0.87241	0.696	0.823902	0.880739	0.89272	0.815971	0.833219	0.909904
0.846502	0.775033	0.863114	0.88109		0.84156	0.856948	0.902459
0.844565	0.758499	0.837596	0.880075		0.837759	0.881577	0.905205
0.901953	0.802229	0.829327	0.884754		0.829847	0.877576	0.882419
0.881641	0.861965	0.825608	0.878888		0.813416	0.87954	0.877856
0.897716	0.833164	0.817968	0.878674		0.861552	0.88552	0.878831
0.893526	0.842907	0.811279	0.88739		0.84748	0.893234	0.880297
0.880126	0.857573	0.812284	0.886542		0.81913	0.880298	0.888585
0.907876	0.842848	0.786145	0.882194		0.813644	0.851869	0.910276
0.909269	0.867692	0.804343	0.876516		0.815724	0.878114	0.903545
0.902478	0.856165	0.82357	0.880539		0.846172	0.85545	0.900647
0.908172	0.874554	0.814341	0.88408		0.850513	0.860247	0.905693
0.894785	0.881986	0.842031	0.877062		0.863083	0.779374	0.895445
0.884195	0.870916	0.843489	0.882688		0.835247	0.729789	0.893129
0.893485	0.85943	0.847715	0.882017		0.801602	0.823618	0.883258
0.899592	0.858284	0.858132	0.886588		0.827755	0.835985	0.895992
0.89622	0.857562	0.875191	0.888859		0.818638	0.803588	0.903619
0.908903	0.871085	0.881456	0.880891		0.843292	0.783966	0.873136
0.896738	0.891844	0.899071	0.887065		0.82689	0.687241	0.835939
0.896195	0.883574	0.913814	0.89741		0.845992	0.612731	0.768399
0.866591	0.879328	0.919709	0.890639		0.856333	0.715036	0.732428
0.89174	0.859385	0.908062	0.89337		0.824179	0.766823	0.715648
0.888862	0.885156	0.914982	0.894328		0.792644	0.731854	0.668436
0.896612	0.897294	0.916653	0.899383		0.785376	0.719763	0.611962
0.883036	0.896962	0.920627	0.90335		0.770085	0.658332	0.708496
0.88308	0.861962	0.920724	0.905306		0.741601	0.752557	0.746255
0.886286	0.876098	0.916474	0.9095		0.782931	0.715131	0.770363
0.868944	0.882844	0.912477	0.906842		0.792746	0.705651	0.767458
0.847832	0.873445	0.911345	0.895584		0.841859	0.824918	0.79204
0.84415	0.87141	0.911697	0.902396		0.839359	0.846078	0.798935
0.818607	0.862514	0.907165	0.896725		0.85616	0.821451	0.813588
0.827343	0.847178	0.917594	0.901356		0.84803	0.824849	0.873359
0.819246	0.856972	0.900886	0.897054		0.876982	0.860874	0.869076
0.823939	0.851539	0.893298	0.884662		0.859718	0.861335	0.884988
0.833266	0.865905	0.88988	0.887315		0.788065	0.856932	0.880881
0.818554	0.876238	0.87739	0.892721		0.780843	0.863923	0.879441
0.817148	0.873172	0.887786	0.875258		0.797572	0.864276	0.902588
0.778207	0.884497	0.89245	0.886631		0.811851	0.860784	0.915854
0.789143	0.85609	0.892236	0.884734		0.80222	0.844511	0.921053
0.77212	0.863137	0.886631	0.880419		0.823462	0.852159	0.898514
0.777732	0.852817	0.901718	0.888254		0.849347	0.849938	0.87652
0.80694	0.868025	0.904539	0.898531		0.835108	0.83814	0.888385
0.77592	0.879146	0.884728	0.894987		0.846944	0.824134	0.843602
0.773418	0.867407	0.891748	0.904599		0.789731	0.83765	0.860579
0.787149	0.858459	0.894484	0.888172		0.819778	0.846967	0.876983
0.753168	0.871134	0.8989	0.894916		0.82029	0.836257	0.870715
0.755726	0.855509	0.908824	0.892855		0.863615	0.833515	0.823036
0.75933	0.862552	0.923321	0.894453		0.872207	0.826849	0.785158
0.757463	0.864283	0.908932	0.895228		0.888287	0.822235	0.870882
0.761548	0.855065	0.923918	0.891828		0.890885	0.861661	0.90871
0.749136	0.869229	0.925445	0.882938		0.892569	0.857807	0.904991
0.752252	0.86296	0.937979	0.881068		0.87918	0.861742	0.905009
0.789136	0.864395	0.940118	0.868412		0.87841	0.852056	0.891903
0.752342	0.876352	0.945269	0.86239		0.861008	0.875908	0.86117
0.771397	0.860705	0.949747	0.851761		0.84905	0.865272	0.860321
0.745149	0.861006	0.950544	0.858825		0.854227	0.900306	0.863656
0.729355	0.858917	0.957884	0.874222		0.85873	0.885637	0.859885
0.750178	0.862237	0.956426	0.860355		0.828687	0.905017	0.869603
0.756919	0.865681	0.958844	0.852984		0.824131	0.902374	0.859778
0.739162	0.861463	0.955566	0.83812		0.808574	0.900922	0.822046
0.728043	0.838586	0.945611	0.829619		0.803954	0.880662	0.82449
0.727956	0.818027	0.935214	0.827582		0.804869	0.864058	0.794941
0.715999	0.820301	0.928998	0.835889		0.802489	0.858454	0.743908
0.710516	0.824913	0.916357	0.845893		0.820455	0.855613	0.760661
0.716178	0.816745	0.913693	0.86936		0.812173	0.866094	0.756528
0.649542	0.842556	0.900152	0.870598		0.780443	0.766142	0.659727
0.662917	0.819155	0.928199	0.869835		0.718002	0.739351	0.621734
0.745114	0.851301	0.916745	0.87612		0.707291	0.684438	0.627119
0.760398	0.866327	0.922077	0.869253		0.74241	0.622513	0.66907
0.779859	0.859965	0.943855	0.876799		0.740656	0.639934	0.732337
0.775837	0.874902	0.94842	0.872518		0.660509		0.770802
0.763494	0.903374	0.936966	0.879654		0.76		0.809914
0.751488	0.888514	0.94591	0.869987		0.765891		0.870186
0.749318	0.88512	0.942081	0.856442		0.799655		0.895306
0.723949	0.889564	0.933659	0.868432		0.810822		0.888074
0.739345	0.900141	0.94057	0.887342		0.84906		0.900966
0.76457	0.872154	0.93828	0.901216		0.863925		0.915852
0.799473	0.873816	0.928112	0.879443		0.833153		0.894793
0.812589	0.886859	0.935595	0.80306		0.794936		0.897015
0.78081	0.877571	0.930923	0.771351		0.807781		0.915
0.816566	0.874228	0.93041	0.744112		0.767541		0.92782
0.786751	0.883347	0.912506	0.705842		0.748011		0.923924
0.794568	0.886303	0.868126	0.655934		0.730693		0.924864
0.822073	0.914127	0.826992	0.770017		0.739248		0.921023
0.811199	0.909996	0.767115	0.833935		0.740406		0.900809
0.821792	0.901533	0.840293	0.869869		0.765415		0.888419
0.809511	0.90027	0.693569	0.898988		0.766006		0.880269
0.813687	0.882099	0.631555	0.901993				0.876401
0.797894	0.877193	0.692187	0.915104				0.876788
0.796683	0.895794	0.717722	0.905966				0.899511
0.792215	0.882397	0.758207	0.889716				0.907535
0.803223	0.870262	0.792905	0.876765				0.919752
0.80991	0.863396	0.797518	0.871437				0.893457
0.794367	0.870484	0.83446	0.872944				0.898073
0.773165	0.848857	0.854177	0.867267				0.889165
0.793016	0.866361	0.891726	0.863703				0.917333
0.811956	0.882892	0.915431	0.872532				0.905598
0.827083	0.909711	0.928863	0.874053				0.923461
0.830711	0.937865	0.924417	0.86956				0.913062
0.856945	0.938266	0.917405	0.858461				0.915226
0.862144	0.949577	0.941039	0.85278				0.92397
0.851269	0.941809	0.943977	0.838926				0.915055
0.875519	0.928024	0.946497	0.850694				0.923163
0.853815	0.921961	0.938284	0.861819				0.909065
0.856699	0.902053	0.929304	0.858622				0.908803
0.828193	0.915621	0.938917	0.873564				0.887974
0.861511	0.881632	0.934776	0.867646				0.862823
0.83981	0.883636	0.92277	0.862163				0.842459
0.859953	0.892121	0.934919	0.86964				0.840565
0.863104	0.862862	0.935296	0.884796				0.834426
0.858028	0.892963	0.93623	0.888833				0.836012
0.866422	0.88004	0.940348	0.887257				0.841656
0.862828	0.91299	0.946737	0.895723				0.813793
0.869107	0.925635	0.953262	0.89698				0.809635
0.874774	0.929155	0.948057	0.904963				0.823997
0.880759	0.924886	0.953381	0.902944				0.796657
0.861828	0.884528	0.958813	0.902968				0.808191
0.876366	0.897183	0.955718	0.905317				0.823351
0.86433	0.888761	0.947666	0.90763				0.819754
0.874959	0.896954	0.944886	0.90866				0.820992
0.888476	0.902186	0.933732	0.908698				0.861308
0.892314	0.895919	0.933407	0.91089				0.814321
0.869261	0.901969	0.932937	0.899914				0.808707
0.879709	0.896857	0.93229	0.899958
0.876041	0.889754	0.922615	0.887942
0.864752	0.888411	0.930288	0.881548
0.851604	0.876404	0.938959	0.878082
0.873413	0.874315	0.934332	0.877139
0.862848	0.872349	0.919952	0.881592
0.844266	0.88987	0.929403	0.856988
0.87571	0.875863	0.908152	0.89319
0.867255	0.872848	0.912576	0.882602
0.875408	0.897609	0.890557	0.900468
0.889084	0.889649	0.908518	0.893042
0.87941	0.883255	0.917096	0.90506
0.892914	0.8625	0.91988	0.907488
0.894944	0.850346	0.925079	0.906746
0.882462	0.843733	0.909711	0.905177
0.875886	0.867513	0.893301	0.909035
0.875935	0.85477	0.90217	0.908756
0.874917	0.84347	0.899883	0.909395
0.884548	0.867612	0.903181	0.912095
0.869935	0.871257	0.89261	0.909591
0.859694	0.891669	0.895958	0.893182
0.856185	0.880719	0.899129	0.903098
0.84334	0.889389	0.907679	0.906476
0.849607	0.8746	0.929023	0.906223
0.871727	0.878942	0.925241	0.906597
0.864041	0.862123	0.925672	0.897818
0.873442	0.87036	0.923164	0.902638
0.860012	0.873886	0.926376	0.893482
0.870937	0.886628	0.924177	0.892946
0.85181	0.887637	0.921407	0.891267
0.828893	0.865998	0.930178	0.888714
0.829657	0.879629	0.935807	0.899446
0.812118	0.86818	0.930391	0.886655
0.820887	0.875408	0.929276	0.890661
0.826446	0.885194	0.921375	0.895059
0.850493	0.884036	0.920675	0.890608
0.846296	0.871261	0.911093	0.888208
0.825248	0.863939	0.898831	0.89666
0.826522	0.871405	0.899949	0.894695
0.793729	0.866228	0.880056	0.890572
0.796785	0.870374	0.850165	0.882573
	0.87741	0.864915	0.878431
	0.87597	0.833538	0.87962
	0.880205	0.82425	0.877019
	0.857341	0.828917	0.871398
	0.858351	0.809152	0.865306
	0.863395	0.812711	0.85108
	0.872174	0.811809	0.856325
	0.865777	0.817964	0.840277
	0.865475	0.797203	0.840571
	0.898665	0.814271	0.834809
	0.898894	0.805399	0.827582
	0.886206	0.81592	0.813691
	0.906261	0.820278	0.83145
	0.879104	0.828313	0.847737
	0.87202	0.821379	0.80714
	0.850335	0.808564	0.801283
	0.854236	0.793057	0.807584
	0.835374	0.801181	0.782166
	0.854033	0.71635	0.749061
	0.853277	0.780068	0.743356
	0.842186	0.805357	0.761679
	0.851503	0.810314	0.74845
	0.846566	0.797613	0.723106
	0.849861	0.858293	0.763451
	0.843711	0.852003	0.847892
	0.851939	0.833575	0.903001
	0.813683	0.81543	0.903304
	0.829751	0.840855	0.910333
	0.828338	0.82875	0.930349
	0.828568	0.821122	0.93677
	0.85063	0.782821	0.926074
	0.840558	0.824438	0.949324
	0.79428	0.848968	0.891559
	0.802006	0.846799	0.836099
	0.785667	0.860896	0.832943
	0.760744	0.910691	0.854552
	0.760862	0.897977
	0.768546	0.86929
	0.767018	0.867281
	0.736017	0.886654
	0.739201
	0.716104
	0.71743
	0.717991
	0.660427
	0.64957
	0.672458
	0.671704
	0.667084
	0.679004
	0.664535
	0.686718
	0.705215
	0.688914
	0.685981
	0.650778
	0.649424
	0.638027
	0.65883
	0.678505
	0.586763
	0.60455
	0.632498
	0.64003
	0.634792
	0.661495
	0.673259
	0.768359
	0.799763
	0.848362
	0.841672
	0.819118
	0.819367
	0.868138
	0.84591
	0.855541
	0.862962
	0.852136
	0.730924
	0.713241
	0.742656

## Sheet: SI10_d
Isocortex	HPF	OLF	CTXsp	STR	PAL	CB	DORsm	DORpm	HY	MBsen	MBmot	MBsta	P-sen	P-mot	P-sat	MY-sen	MY-mot
0.836392	0.832365	0.658027	0.705847	0.705926	0.711377	0.707976	0.787603	0.710321	0.754051	0.579356	0.846585	0.743824	0.741793	0.750795	0.768382	0.903614	0.721885
0.891686	0.876083	0.605059	0.725414	0.746343	0.739016	0.716426	0.812437	0.802614	0.732566	0.693244	0.855883	0.744496	0.837283	0.818966	0.785271	0.88209	0.643312
0.885913	0.843121	0.656674	0.741784	0.761536	0.754373	0.730487	0.799829	0.816734	0.741201	0.739736	0.874735	0.744115	0.883519	0.789074	0.819476	0.917425	0.699971
0.896455	0.860041	0.713227	0.737981	0.795064	0.792779	0.747966	0.794697	0.808721	0.761278	0.679701	0.924008	0.719938	0.868225	0.794958	0.817932	0.9117	0.749316
0.848519	0.907733	0.667694	0.797608	0.817816	0.774127	0.767135	0.751823	0.854458	0.713435	0.719508	0.899317	0.727004	0.87802	0.787251	0.81751	0.846623	0.726242
0.893232	0.931103	0.680684	0.796221	0.778173	0.740246	0.785538	0.774547	0.828113	0.721775	0.766416	0.899698	0.719811	0.895303	0.798438	0.800581	0.826233	0.81473
0.895219	0.795671	0.725402	0.765265	0.803685	0.776666	0.803264	0.790903	0.784114	0.75046	0.813224	0.897355	0.739171	0.884016	0.811755	0.814475	0.825471	0.797014
0.936573	0.849112	0.706279	0.73271	0.842679	0.736604	0.815639	0.793646	0.74788	0.735758	0.800218	0.893723	0.744021	0.868035	0.786239	0.802779	0.826986	0.860122
0.940783	0.839919	0.72754	0.707818	0.87443	0.764514	0.839339	0.783122	0.784093	0.747972	0.749878	0.840645	0.736235	0.866874	0.788931	0.846672	0.853547	0.840084
0.954579	0.856736	0.704558	0.718373	0.877778	0.752571	0.843493	0.739875	0.796607	0.671491	0.736589	0.808142	0.692688	0.870591	0.744559	0.832982	0.878538	0.835949
0.935905	0.899771	0.785148	0.714047	0.87145	0.729524	0.848207	0.743505	0.772803	0.709579	0.751347	0.768397	0.730238	0.879411	0.7047	0.834667	0.895759	0.849577
0.947931	0.847879	0.803062	0.702562	0.870437	0.718627	0.869362	0.760532	0.716383	0.745106	0.767403	0.711557	0.793998	0.896983	0.720278	0.864923	0.921464	0.851249
0.945849	0.85349	0.785401	0.729266	0.872204	0.693733	0.87266	0.788209	0.652355	0.733198	0.773316	0.701201	0.75178	0.909753	0.722351	0.869191	0.88925	0.845368
0.94533	0.896633	0.770333	0.756966	0.887088	0.712584	0.875391	0.784498	0.59409	0.773948	0.785524	0.730278	0.742453	0.916453	0.827754	0.892887	0.872377	0.842105
0.960825	0.827463	0.812558	0.75	0.896633	0.751001	0.879328	0.787873	0.641606	0.733044	0.744749	0.750771	0.760549	0.921125	0.779189	0.899543	0.868373	0.840015
0.946076	0.843364	0.759938	0.758648	0.892395	0.739483	0.862303	0.800153	0.640596	0.715759	0.76676	0.729427	0.69492	0.902121	0.75213	0.894365	0.888353	0.835364
0.946396	0.831522	0.792052	0.759098	0.893381	0.714322	0.892038	0.802215	0.620052	0.74399	0.777913	0.713209	0.701928	0.873653	0.754584	0.915572	0.889951	0.851095
0.954823	0.807932	0.818246	0.774671	0.900333	0.714558	0.893325	0.821546	0.553089	0.766097	0.749772	0.717739	0.710623	0.838534	0.809304	0.916416	0.870744	0.862784
0.94078	0.824267	0.80713	0.789802	0.900427	0.701795	0.896589	0.819337	0.591047	0.765203	0.748615	0.722835	0.741371	0.77675	0.810886	0.898394	0.873285	0.845434
0.947547	0.81924	0.801299	0.78654	0.898872	0.701201	0.893474	0.802132	0.641832	0.776433	0.749073	0.763505	0.747764	0.719025	0.825844	0.896562	0.879752	0.86729
0.951291	0.758811	0.851965	0.789227	0.911845	0.702993	0.896752	0.794193	0.65816	0.77045	0.739078	0.760868	0.722751	0.656095	0.804806	0.902103	0.890411	0.865743
0.946797	0.794152	0.860955	0.78854	0.903123	0.736479	0.881127	0.806147	0.670029	0.758198	0.719014	0.775312	0.73668	0.703524	0.815387	0.875842	0.90626	0.866633
0.960625	0.812294	0.856827	0.812818	0.900173	0.728073	0.854531	0.817561	0.727767	0.769155	0.685729	0.794755	0.738076	0.718529	0.831404	0.869669	0.907675	0.888725
0.956797	0.802253	0.875529	0.824805	0.906246	0.692492	0.846972	0.823986	0.729646	0.770631	0.737909	0.77576	0.730647	0.720733	0.816244	0.84821	0.902834	0.884453
0.940139	0.814832	0.867861	0.835719	0.928424	0.692803	0.835477	0.812746	0.746599	0.771542	0.729627	0.781426	0.709363	0.68583	0.809297	0.828115	0.898053	0.877021
0.943904	0.820149	0.880742	0.817212	0.92734	0.737885	0.838564	0.769001	0.74287	0.807197	0.683094	0.765856	0.664732	0.649072	0.782787	0.838786	0.917077	0.884216
0.94764	0.813162	0.864552	0.806903	0.936251	0.728002	0.841901	0.794423	0.751651	0.823654	0.615459	0.77364	0.66741	0.642163	0.778867	0.839355	0.92612	0.878891
0.946591	0.818514	0.869183	0.814973	0.930506	0.733563	0.843914	0.81237	0.763572	0.820062	0.613088	0.765652	0.682224	0.620238	0.793263	0.845782	0.899637	0.868184
0.953595	0.825951	0.836501	0.820076	0.927122	0.741841	0.851038	0.813324	0.766781	0.800507	0.591876	0.761745	0.654404	0.625571	0.784561	0.845562	0.847601	0.844978
0.94599	0.787452	0.824015	0.83808	0.918558	0.76917	0.859627	0.791579	0.768871	0.821501	0.58909	0.753182	0.907808	0.643956	0.770694	0.849131	0.836171	0.851531
0.942564	0.818778	0.81275	0.832673	0.912574	0.773009	0.853551	0.844307	0.776827	0.863882	0.661346	0.768154	0.870561	0.660823	0.732341	0.845218	0.808057	0.841404
0.947734	0.835302	0.809977	0.831258	0.907402	0.818789	0.867719	0.843615	0.79534	0.851433	0.632465	0.753615	0.90159	0.666667	0.740586	0.866685	0.766058	0.853484
0.947021	0.813928	0.803462	0.842274	0.902669	0.802295	0.870624	0.835824	0.789676	0.857016	0.607836	0.766674	0.844084	0.662843	0.759301	0.862935	0.779636	0.845345
0.932744	0.817712	0.81887	0.841713	0.897885	0.832402	0.861125	0.833822	0.807368	0.877531	0.519439	0.774304	0.832833	0.628987	0.777223	0.827605	0.83719	0.840333
0.946909	0.780166	0.790771	0.855718	0.892264	0.815899	0.861441	0.852591	0.802437	0.886123	0.513211	0.744485	0.825226	0.643114	0.795994	0.801741	0.910076	0.840872
0.949242	0.802419	0.800911	0.866957	0.887778	0.785586	0.869544	0.842023	0.805395	0.892045	0.51035	0.761611	0.861552	0.662213	0.797464	0.778345	0.897959	0.846545
0.950226	0.858448	0.824065	0.862834	0.895694	0.831668	0.858208	0.827026	0.811405	0.893156	0.514364	0.765628	0.822599	0.666397	0.802853	0.767842	0.905209	0.852269
0.94413	0.863874	0.829613	0.868653	0.898527	0.817825	0.8622	0.833159	0.792194	0.890701	0.602314	0.751516	0.758368	0.637384	0.796517	0.763106	0.90165	0.854074
0.930219	0.83282	0.804426	0.8711	0.902757	0.835571	0.874811	0.816322	0.802503	0.897614	0.628433	0.766745	0.731123	0.676144	0.785105	0.752152	0.877442	0.861947
0.926257	0.829579	0.778462	0.864765	0.903669	0.849326	0.866751	0.860186	0.800576	0.906252	0.565868	0.758385	0.760931	0.71382	0.792135	0.771852	0.862339	0.849734
0.94776	0.836278	0.777618	0.881775	0.901006	0.854147	0.860442	0.834626	0.821148	0.890988	0.639656	0.773406	0.791455	0.751445	0.803613	0.774296	0.880718	0.871207
0.951448	0.845039	0.791409	0.874031	0.898531	0.873682	0.850026	0.833725	0.813503	0.899615	0.566358	0.775534	0.820517	0.796509	0.806352	0.759507	0.88194	0.862824
0.944831	0.862022	0.813501	0.867394	0.886355	0.855289	0.852604	0.824966	0.824208	0.881296	0.590052	0.789284	0.818206	0.73579	0.790774	0.742171	0.806267	0.868762
0.942266	0.868162	0.80723	0.87257	0.883782	0.888556	0.842723	0.831554	0.83571	0.88201	0.671738	0.796175	0.822086	0.736276	0.783412	0.710547	0.76859	0.8644
0.946171	0.866487	0.782912	0.865377	0.882526	0.856467	0.794875	0.81527	0.815808	0.895751	0.657448	0.816261	0.811056	0.737553	0.797177	0.732516	0.706367	0.880872
0.951928	0.894923	0.785901	0.865191	0.87705	0.860313	0.81919	0.796877	0.832121	0.895467	0.685961	0.813092	0.815037	0.756747	0.784652	0.685931	0.698253	0.865127
0.94842	0.918027	0.79787	0.872255	0.888678	0.868668	0.816424	0.798306	0.830238	0.888641	0.68949	0.806735	0.790562	0.794404	0.778284	0.693105	0.67845	0.878124
0.945345	0.919046	0.813772	0.848738	0.888855	0.842466	0.819679	0.796725	0.839895	0.898254	0.678653	0.778877	0.742896	0.840822	0.75723	0.68615	0.648271	0.854127
0.933981	0.926171	0.778211	0.868635	0.875132	0.848521	0.807946	0.834671	0.799153	0.889727	0.635174	0.717893	0.730173	0.855016	0.769599	0.650582	0.598039	0.857837
0.939403	0.921854	0.782749	0.862424	0.877146	0.852558	0.805102	0.79774	0.823232	0.872414	0.660874	0.784867	0.690152	0.888292	0.760887	0.66129	0.583486	0.858945
0.944549	0.927412	0.788001	0.843562	0.871291	0.829669	0.80402	0.816269	0.819845	0.854522	0.679501	0.784001	0.716438	0.89844	0.732004	0.665551	0.662991	0.84279
0.944719	0.919312	0.786423	0.844414	0.884543	0.787778	0.793037	0.827138	0.809477	0.86087	0.674666	0.790971	0.77042	0.897238	0.716383	0.653478	0.733445	0.850976
0.946779	0.914732	0.797697	0.848889	0.888276	0.807307	0.791445	0.818139	0.839133	0.862437	0.636696	0.721708	0.811328	0.895123	0.714213	0.662653	0.714724	0.835883
0.949463	0.915318	0.816318	0.837678	0.900868	0.808938	0.764706	0.850932	0.845712	0.853836	0.634529	0.705718	0.828962	0.9017	0.716863	0.725858	0.7675	0.849359
0.957226	0.911224	0.802038	0.818804	0.900851	0.811455	0.770333	0.833206	0.850275	0.853963	0.643745	0.728737	0.773659	0.897156	0.757962	0.8021	0.812759	0.852707
0.956757	0.923066	0.811701	0.817685	0.887392	0.79867	0.771519	0.824822	0.851658	0.858834	0.677211	0.749748	0.749859	0.900543	0.783743	0.83436	0.855864	0.862753
0.956425	0.923932	0.812844	0.804032	0.884694	0.779814	0.788266	0.820536	0.839256	0.849543	0.694237	0.750892	0.811429	0.898945	0.792701	0.874956	0.852146	0.874083
0.948636	0.927096	0.807534	0.790453	0.883361	0.754143	0.803309	0.836221	0.833231	0.862073	0.686525	0.754438	0.903788	0.892323	0.806533	0.882627	0.864206	0.865975
0.954391	0.930964	0.810667	0.763474	0.893021	0.769894	0.806212	0.829713	0.853755	0.859348	0.723758	0.760217	0.903563	0.883346	0.78507	0.848485	0.882207	0.848865
0.951525	0.929128	0.780922	0.748673	0.909529	0.802946	0.831021	0.823456	0.852252	0.868144	0.758285	0.770131	0.660218	0.87876	0.810188	0.87708	0.86493	0.842817
0.953791	0.933518	0.783146	0.73892	0.914255	0.78448	0.827271	0.822933	0.8377	0.865438	0.768187	0.73773	0.695376	0.871327	0.83532	0.873257	0.870543	0.848109
0.957264	0.945658	0.776502	0.708725	0.91295	0.790882	0.827638	0.835291	0.8471	0.853891	0.705867	0.747019	0.723507	0.86827	0.82199	0.878392	0.838686	0.844745
0.961602	0.951942	0.774414	0.709729	0.902367	0.780657	0.847545	0.833805	0.81259	0.861152	0.72366	0.768452	0.755556	0.844809	0.824597	0.864842	0.823358	0.829879
0.957808	0.949387	0.789096	0.71988	0.907717	0.773484	0.840692	0.840624	0.849429	0.869488	0.738106	0.750492	0.784094	0.839465	0.818537	0.893508	0.886328	0.841675
0.961739	0.949705	0.778999	0.713295	0.899641	0.78476	0.854654	0.821194	0.844142	0.874121	0.690431	0.742151	0.803288	0.771397	0.763705	0.871485	0.878488	0.843795
0.961726	0.955763	0.794127	0.700128	0.913161	0.768941	0.873267	0.82453	0.83469	0.870466	0.656905	0.741549	0.769811	0.733015	0.764484	0.820156	0.610648	0.835405
0.962638	0.950838	0.830813	0.738906	0.919604	0.764669	0.877789	0.841255	0.847725	0.873989	0.669015	0.725738	0.732167	0.773488	0.781574	0.745799	0.722639	0.84752
0.959992	0.954758	0.833935	0.717516	0.912667	0.777609	0.883175	0.850449	0.806924	0.892446	0.625319	0.7422	0.751546	0.840068	0.778454	0.750457	0.759264	0.854842
0.954926	0.950809	0.842981	0.730232	0.911627	0.787831	0.879907	0.832867	0.81737	0.889831	0.596639	0.718425	0.747935	0.845942	0.766888	0.803888	0.781654	0.851196
0.948697	0.95187	0.851173	0.731434	0.908328	0.755802	0.87369	0.834062	0.821093	0.889732	0.626101	0.769704	0.76503	0.852948	0.771926	0.790562	0.818908	0.86507
0.9506	0.95157	0.83084	0.742268	0.908515	0.752505	0.864198	0.824478	0.755827	0.898831	0.605187	0.760372	0.721592	0.854191	0.74308	0.795652	0.820261	0.892874
0.95163	0.955462	0.832741	0.751726	0.914235	0.744076	0.867169	0.838354	0.798726	0.902516	0.607624	0.738893	0.681593	0.849568	0.737722	0.788732	0.816542	0.907049
0.948859	0.954776	0.839859	0.73092	0.912092	0.766748	0.871739	0.834799	0.802156	0.908002		0.766109	0.694531	0.845406	0.734683	0.818476	0.835495	0.889475
0.942811	0.956232	0.8275	0.723597	0.913444	0.696087	0.870912	0.804304	0.827597	0.911786		0.757357	0.735622	0.852587	0.698785	0.840068	0.851994	0.862025
0.941929	0.954331	0.81525	0.737048	0.911921	0.702458	0.879463	0.824735	0.811577	0.914289		0.781914	0.7169	0.884186	0.70016	0.845942	0.880658	0.813076
0.944897	0.959055	0.84058	0.752802	0.913741	0.669081	0.876826	0.78526	0.841156	0.926161		0.774707	0.756035	0.89836	0.728687	0.852948	0.868189	0.683301
0.946317	0.959223	0.83034	0.716108	0.912017	0.69626	0.879741	0.808893	0.820039	0.924782		0.788608	0.757674	0.896395	0.722739	0.854191	0.869215	0.543893
0.944323	0.95916	0.816259	0.644739	0.914055	0.696112	0.877215	0.808699	0.834256	0.920127		0.807996	0.744248	0.896004	0.774097	0.849568	0.845639	0.562572
0.942991	0.954014	0.830769	0.668292	0.917338	0.657656	0.877309	0.79491	0.827811	0.93145		0.775632	0.744154	0.833401	0.784982	0.845406	0.851765	0.637103
0.94226	0.959811	0.833719	0.650104	0.911306	0.612761	0.86813	0.768817	0.844833	0.922687		0.771969	0.75437	0.822008	0.771331	0.852587	0.861228	0.743411
0.948026	0.960802	0.822685	0.64993	0.896357	0.62885	0.87826	0.801327	0.813396	0.922086		0.779656	0.762815	0.832288	0.770101	0.884186	0.888981	0.818525
0.946316	0.958844	0.823303	0.6491	0.892564	0.648908	0.882481	0.752425	0.855753	0.922577		0.779026	0.692954	0.86959	0.787121	0.89836	0.873961	0.859928
0.943387	0.958926	0.820345	0.687352	0.90498	0.607935	0.879211	0.765526	0.84846	0.913484		0.763152	0.751493	0.887371	0.763324	0.896395	0.889717	0.870332
0.94184	0.961747	0.839852	0.678992	0.901687	0.662642	0.890753	0.743224	0.80317	0.911237		0.779479	0.721088	0.888934	0.789392	0.896004	0.891563	0.852623
0.943235	0.959108	0.82244	0.637778	0.906968	0.617757	0.896921	0.756419	0.825285	0.905109		0.766095	0.695137	0.899843	0.710327	0.728646	0.864419	0.857003
0.940415	0.957636	0.822331	0.602931	0.89844	0.623068	0.874345	0.695287	0.858895	0.918563		0.772915	0.682425	0.899503	0.757323	0.706989	0.856013	0.862287
0.940555	0.960582	0.841381	0.654685	0.893238	0.653748	0.84363	0.695652	0.84952	0.916838		0.774041	0.665775	0.900904	0.810114	0.651314	0.85165	0.872711
0.947469	0.963809	0.839564	0.648283	0.901453	0.678764	0.844018	0.647402	0.862458	0.922436		0.792343	0.672018	0.88501	0.79397	0.63829	0.847426	0.87495
0.948233	0.964462	0.845614	0.66905	0.901992	0.679569	0.881774	0.556679	0.870231	0.926626		0.794657	0.837283		0.81399	0.641453	0.843235	0.873966
0.940705	0.964175	0.840149	0.692485	0.889464	0.689169	0.886575	0.658147	0.860161	0.925395		0.810249	0.883519		0.808944	0.704603	0.81449	0.869834
0.94409	0.965466	0.80884	0.720246	0.901016	0.671122	0.876502	0.732054	0.827216	0.930536		0.812215	0.868225		0.823655	0.733287	0.762479	0.871891
0.944786	0.963612	0.841797	0.707597	0.88917	0.658567	0.873311	0.744078	0.833401	0.92744		0.800299	0.87802		0.812854	0.758252	0.727179	0.889617
0.947148	0.962772	0.808616	0.722303	0.891252	0.683446	0.85253	0.784452	0.822008	0.93468		0.796845	0.895303		0.805243	0.743059	0.689488	0.873715
0.943698	0.963997	0.804255	0.719133	0.898006	0.69564	0.840068	0.785119	0.832288	0.924982		0.8139	0.884016		0.835038	0.716765	0.653762	0.864331
0.947532	0.966421	0.765101	0.728923	0.900211	0.703738	0.845942	0.746095	0.86959	0.930282		0.801625	0.868035		0.844424	0.654302	0.653808	0.866719
0.952144	0.966127	0.786139	0.657305	0.906827	0.710215	0.852948	0.748823	0.887371	0.920623		0.793908	0.866874		0.825469	0.672695		0.869599
0.95388	0.964031	0.814266	0.671437	0.908982	0.729612	0.854191	0.739017	0.888934	0.915025		0.79755	0.870591		0.821498	0.711105		0.85645
0.954434	0.961399	0.84377	0.646222	0.90703	0.76056	0.849568	0.74184	0.899843	0.913416		0.819337	0.879411		0.800715	0.663718		0.851029
0.952207	0.961029	0.877485	0.659144	0.913482	0.722629	0.845406	0.763462	0.899503	0.916579		0.799223	0.896983		0.809044	0.713303		0.849583
0.950632	0.959965	0.878268	0.636018	0.911036	0.731773	0.852587	0.77252	0.900904	0.900947		0.783655	0.909753		0.758037	0.726116		0.859729
0.949615	0.961599	0.890434	0.62247	0.913442	0.710123	0.884186	0.783046	0.88501	0.882481		0.788734	0.877133		0.766201	0.709026		0.84998
0.948991	0.957488	0.845038	0.559739	0.91083	0.753987	0.89836	0.743846	0.895702	0.880845		0.695909	0.8524		0.716279	0.711684		0.849583
0.947523	0.956526	0.830267	0.599248	0.914134	0.708768	0.896395	0.753447	0.876941	0.864983		0.76093	0.866444		0.815639	0.662472		0.818393
0.951014	0.958121	0.85198	0.564697	0.910257	0.590631	0.896004	0.767969	0.889885	0.835987		0.749225	0.861165		0.839339	0.6753		0.787071
0.94883	0.954204	0.823296	0.564673	0.902231	0.619888	0.890017	0.802353	0.864629	0.75572		0.758467	0.887976		0.843493	0.73054		0.809284
0.94661	0.955766	0.821877	0.561404	0.911036	0.602421	0.900964	0.783664	0.892189	0.73329		0.78629	0.84808		0.848207	0.761495		0.845773
0.945848	0.95439	0.799255	0.548939	0.906883	0.678784	0.887761	0.793904	0.892403	0.771095		0.792427	0.846363		0.869362	0.796494		0.85235
0.946305	0.95086	0.813931	0.623106	0.898065	0.661372	0.874852	0.774915	0.893527	0.64402		0.809358	0.879259		0.87266	0.849626		0.853933
0.945006	0.952716	0.780552	0.655866	0.89782	0.684413	0.880096	0.800862	0.877133	0.61744		0.802661	0.898116		0.875391	0.845249		0.869017
0.943633	0.949595	0.761905	0.648007	0.90248	0.737477	0.86809	0.790617	0.8524	0.721739		0.802914	0.840068		0.879328	0.865003		0.867627
0.938785	0.947512	0.718994	0.614889	0.901042	0.724852	0.857797	0.807533	0.866444	0.721229		0.79161	0.845942		0.862303	0.873916		0.855156
0.937086	0.946968	0.752172	0.638369	0.904935	0.716874	0.860382	0.814275	0.861165	0.842551		0.796889	0.852948		0.892038	0.860321		0.83867
0.934717	0.9459	0.799457	0.601926	0.900633	0.708473	0.881252	0.81705	0.887976	0.860877		0.794626	0.854191		0.893325	0.867713		0.845771
0.935715	0.94504	0.783586	0.604502	0.902142	0.696473	0.877406	0.83136	0.84808	0.886824		0.783577	0.849568		0.896589	0.875707		0.818383
0.929518	0.942531	0.766032	0.5841	0.904173	0.707536	0.884685	0.8125	0.846363	0.897416		0.769828	0.845406		0.893474	0.879197		0.791411
0.935937	0.939471	0.793864	0.643695	0.913614	0.722596	0.892007	0.805805	0.879259	0.911685		0.770392	0.852587		0.896752	0.884635		0.809349
0.931141	0.941811	0.807885	0.634873	0.918767	0.673469	0.861052	0.814157	0.898116	0.914373		0.758023	0.884186		0.881127	0.900238		0.831522
0.932863	0.947024	0.80181	0.646351	0.922029	0.651112	0.871952	0.827778	0.919186	0.925299		0.768512	0.89836		0.854531	0.893275		0.816876
0.936167	0.943942	0.77148	0.612052	0.916186	0.740601	0.860829	0.816718	0.927997	0.935399		0.776861	0.896395		0.846972	0.887947		0.794801
0.928627	0.940306	0.795955	0.591766	0.922032	0.739198	0.828931	0.8327	0.941848	0.929724		0.777934	0.896004		0.835477	0.905622		0.808689
0.928894	0.936753	0.77897	0.617641	0.925542	0.767437	0.869238	0.844378	0.940713	0.93851		0.792621	0.8125		0.838564	0.928398		0.825369
0.92589	0.910508	0.824401	0.610813	0.926828	0.701734	0.843551	0.852999	0.930098	0.931879		0.782928	0.805805		0.841901	0.917162		0.88681
0.9215	0.901467	0.764911	0.656518	0.924616	0.714522	0.847097	0.81907	0.92886	0.923047		0.780452	0.814157		0.843914	0.89935		0.901961
0.917343	0.888591	0.768349	0.628909	0.927709	0.8131	0.868859	0.826335	0.894752	0.925523		0.775984	0.827778		0.888633	0.895728		0.895755
0.907536	0.885338	0.774885	0.735986	0.930892	0.834052	0.859219	0.832478	0.853837	0.912162		0.765304	0.816718		0.886512	0.880446		0.878431
0.874331	0.880194	0.768027	0.724748	0.932936	0.697978	0.844111	0.85051	0.852348	0.916295		0.752559	0.8327		0.879942	0.866508		0.876324
0.867372	0.884362	0.775214	0.785211	0.927094	0.681424	0.875258	0.836207	0.83683	0.919194		0.742545	0.844378		0.882017	0.854142		0.884487
0.851396	0.889079	0.7721	0.778197	0.92604	0.778569	0.844025	0.855458	0.849118	0.907233		0.742161	0.852999		0.865966	0.859786		0.862751
0.852552	0.892575	0.755293	0.740864	0.925423	0.794593	0.832635	0.835518	0.846474	0.907591		0.741347	0.81907		0.871231	0.856306		0.853531
0.840263	0.891978	0.753667	0.720035	0.920849	0.696101	0.841175	0.831559	0.850844	0.906753		0.743999	0.826335		0.872528	0.853955		0.862545
0.841645	0.871687	0.759924	0.76128	0.915897	0.699542	0.850494	0.843012	0.837364	0.912805		0.708935	0.832478		0.863305	0.85165		0.906133
0.846581	0.866439	0.743091	0.741259	0.914544	0.726303	0.851111	0.841604	0.835851	0.897715		0.70894	0.85051		0.850338	0.85531		0.892351
0.860255	0.836328	0.780552	0.738039	0.918334	0.579103	0.847234	0.852522	0.836144	0.910886		0.706475	0.836207		0.837051	0.855253		0.899203
0.866806	0.810067	0.801347	0.78111	0.922886	0.620444	0.844762	0.855982	0.845892	0.912959		0.750124	0.855458		0.825604	0.825873		0.895753
0.837567	0.793239	0.795626	0.770747	0.92037	0.613971	0.85516	0.829245	0.831632	0.921651		0.727358	0.835518		0.868895	0.842703		0.896316
0.837892	0.767516	0.803211	0.791167	0.919597	0.636574	0.855951	0.868895	0.853062	0.931508		0.747745	0.831559		0.850324	0.7995		0.878658
0.838559	0.79784	0.833214	0.78379	0.916466	0.724272	0.827829	0.850324	0.879447	0.929642		0.711958	0.843012		0.862673	0.797575		0.887793
0.821865	0.822083	0.866385	0.793819	0.919152	0.713041	0.840405	0.862673	0.89329	0.922465		0.72731	0.841604		0.836918	0.787928		0.902926
0.819266	0.837685	0.802216	0.800225	0.920868	0.70596	0.82058	0.836918	0.896478	0.924647		0.706779	0.868859		0.855529	0.710078		0.904022
0.80899	0.822854	0.803972	0.820273	0.922	0.731995	0.816281	0.855529	0.887	0.920248		0.733142	0.859219		0.83638			0.870928
0.82205	0.8305	0.77518	0.832161	0.925892	0.737842	0.814997	0.83638	0.864039	0.922581		0.756146	0.844111		0.847979			0.885013
0.83884	0.77733	0.788747	0.863382	0.920931	0.739951	0.832038	0.847979	0.876745	0.906229		0.792118	0.875258		0.85249			0.883173
0.848374	0.742365	0.785497	0.867285	0.920805	0.735392	0.798157	0.85249	0.87963	0.906547		0.794795	0.844025		0.86898			0.869447
0.839362	0.716993	0.809137	0.868488	0.929863	0.680921	0.818182	0.86898	0.86044	0.9054		0.764142	0.832635		0.861164			0.843066
0.848609	0.739683	0.799796	0.86107	0.927196	0.598922	0.830089	0.861164	0.832413	0.888633		0.756184	0.841175		0.858532			0.83437
0.812197	0.707602	0.795753	0.869865	0.921558	0.60818	0.806386	0.858532	0.860472	0.886512		0.76119	0.850494		0.856202			0.86268
0.788353	0.692481	0.77132	0.873479	0.920578	0.625952	0.82297	0.856202	0.876122	0.879942		0.724722	0.851111		0.83859			0.852328
0.781255	0.679988	0.732158	0.886423	0.922207	0.574912	0.82179	0.83859	0.832518	0.882017		0.704205	0.847234					0.860025
0.791667	0.690965	0.795388	0.886094	0.916697	0.552473	0.820976	0.854015	0.811062	0.865966		0.736099	0.844762					0.817116
0.772991	0.69993	0.791573	0.87741	0.921648	0.603577	0.847488	0.840681	0.852375	0.871231		0.746831	0.85516					0.807127
0.7741	0.684023	0.798609	0.86955	0.927693	0.632204	0.845654	0.801952	0.845478	0.872528		0.712356						0.720091
0.770097	0.651388	0.846049	0.841824	0.928011	0.598374	0.819243	0.780356	0.818493	0.863305		0.696394						0.791161
0.774798	0.634047	0.808874	0.874614	0.92819	0.648821	0.792742	0.723592	0.840981	0.850338		0.686888						0.716402
0.786194	0.619671	0.817013	0.850579	0.926274	0.623977	0.802405	0.791307	0.843897	0.837051		0.722121						0.704146
0.778116	0.577678	0.804611	0.856675	0.930443	0.622021	0.852772	0.797685	0.83404	0.825604		0.727991						0.624347
0.768114	0.618458	0.78399	0.870434	0.939281	0.5763	0.841591	0.804793	0.861457	0.821941		0.715092						0.611234
0.759585	0.648864	0.823789	0.845191	0.935829	0.642683	0.843835	0.810398	0.81647	0.834615		0.745055						0.751155
0.755143	0.633402	0.803733	0.867113	0.917529	0.641704	0.84956	0.822877	0.813613	0.818081		0.731804						0.83137
0.738349	0.616453	0.762884	0.869669	0.904903	0.645374	0.872463	0.827385	0.771697	0.817889		0.719946						0.765413
0.754678	0.669615	0.752381	0.872032	0.881306	0.669152	0.893483	0.830581	0.723766	0.822164		0.702066						0.735444
0.759508	0.714729	0.758001	0.887607	0.852973	0.673731	0.859959	0.810257	0.758443	0.827487		0.726459
0.765436	0.628927	0.763545	0.861478	0.860948	0.659815	0.842786	0.821148	0.739665	0.816782		0.690589
0.757013	0.647107	0.767171	0.893858	0.869292	0.685777	0.842329	0.785688	0.717635	0.83852		0.737833
0.77	0.708972	0.765592	0.87504	0.877745	0.673339	0.83321	0.786829	0.761529	0.833177		0.701312
0.790623	0.701819	0.775585	0.874739	0.860045	0.690257	0.848545	0.70778	0.723657	0.856189		0.708595
0.763167	0.741505	0.768994	0.890941	0.8599	0.701069	0.850568	0.752392	0.745437	0.836987		0.719414
0.777216	0.773881	0.776402	0.895326	0.872425	0.637586	0.810115	0.718795	0.712893	0.854951		0.727902
0.796893	0.780027	0.755777	0.889678	0.872232	0.590704	0.862002	0.766443	0.752912	0.857143		0.752425
0.7818	0.755716	0.768096	0.887858	0.889012	0.611286	0.873144	0.812692	0.731506	0.855286		0.721875
0.806936	0.783843	0.777982	0.891399	0.910509	0.630818	0.876417	0.824423	0.740521	0.872006		0.741053
0.823167	0.763851	0.815482	0.884536	0.903631	0.53833	0.861725	0.837644	0.766135	0.872074		0.74252
0.83467	0.731156	0.81797	0.891896	0.904472	0.539973	0.887285	0.805313	0.777148	0.871949		0.749477
0.819769	0.780152	0.817664	0.861396	0.901586	0.603047	0.894282	0.77276	0.768559	0.859092		0.725871
0.812864	0.786545	0.839808	0.883673	0.881954	0.643154	0.896063	0.794328	0.804781	0.868787		0.735824
0.82232	0.747803	0.843437	0.88487	0.87268	0.712802	0.897741	0.75812	0.787227	0.887722		0.71399
0.797945	0.655313	0.826382	0.883834	0.883212	0.704654	0.902269		0.815619	0.890845		0.70894
0.832243	0.725623	0.801731	0.862423	0.880456	0.693166	0.899587		0.825728	0.870714		0.673783
0.842963	0.714627	0.822166	0.870198	0.872389	0.675763	0.899484		0.823621	0.861197		0.901467
0.819474	0.793927	0.809071	0.859544	0.87494	0.704622	0.910422		0.830338	0.850221		0.888591
0.771282	0.777432	0.800674	0.821892	0.868722	0.722714	0.892278		0.82693	0.846995		0.885338
0.815861	0.750774	0.757865	0.803997	0.8651	0.701982	0.883778		0.835061	0.825994		0.880194
0.80893	0.752123	0.765822	0.758184	0.859559	0.751794	0.890179		0.821075	0.819139		0.884362
0.856116	0.708878	0.75409	0.764837	0.856051	0.731412	0.898342		0.820787	0.817566		0.889079
0.844748	0.650927	0.793126	0.777865	0.857856	0.761784	0.902103		0.803304	0.814559		0.892575
0.82604	0.659562	0.804353	0.77606	0.863186	0.785945	0.905538		0.820043	0.807509		0.891978
0.842225	0.641304	0.781045	0.745942	0.87059	0.732705	0.907271		0.825087	0.786868		0.871687
0.826163	0.61442	0.729769	0.72635	0.86799	0.772873	0.890152		0.815064	0.785284		0.866439
0.787968	0.60873	0.737414	0.774895	0.880708	0.802379	0.895956		0.748986	0.78316		0.836328
0.760604	0.686573	0.704182	0.78215	0.887898	0.797301	0.909026		0.790406	0.792787		0.810067
0.783851	0.721496	0.743031	0.791608	0.888682	0.807461	0.902198		0.787078	0.765306		0.856613
0.75543	0.689904	0.705194	0.74571	0.882421	0.781347	0.899054		0.806872	0.744004		0.849382
0.808987	0.700516	0.726913	0.752119	0.875824	0.795644	0.883085		0.821469	0.766459		0.834092
0.763422	0.71859	0.732365	0.746865	0.877083	0.808671	0.900323		0.829776	0.73166		0.835339
0.820561	0.681548	0.776325	0.693205	0.890109	0.801868	0.886783		0.831118	0.751639		0.85588
0.800184	0.657182	0.793188	0.688889	0.885702	0.834376	0.903918		0.821053	0.744331		0.879556
0.815296	0.749861	0.813771	0.626211	0.875334	0.851476	0.910653		0.83311	0.703955		0.837601
0.751677	0.697608	0.83726	0.672407	0.869941	0.832347	0.904643		0.8045	0.693229		0.864613
0.742101	0.795992	0.837454		0.810362	0.840907	0.909091		0.837924	0.662988		0.859559
0.701482	0.683453	0.846497		0.789053	0.842712	0.892088		0.835077	0.656238		0.856051
0.728621	0.707927	0.85959		0.782596	0.830432	0.878648		0.8245	0.715368		0.857856
0.723833	0.664566	0.855013		0.785692	0.843996	0.882664		0.817741	0.622617		0.863186
0.735382	0.688616	0.840801		0.794253	0.825596	0.897096		0.808917	0.644826		0.87059
0.673706	0.720075	0.848987		0.746736	0.825445	0.873606		0.817037	0.639155		0.86799
0.734644	0.645838	0.791931		0.749507	0.836892	0.874217		0.797541	0.606619		0.880708
0.715443	0.602349	0.830486		0.742377	0.832669	0.841888		0.80397	0.69909		0.887898
0.713388	0.627169	0.840262		0.765125	0.833161	0.873801		0.788431	0.744503		0.888682
0.731239	0.773723	0.820503		0.787739	0.799115	0.901088		0.793671	0.70272		0.882421
0.710908	0.812688	0.837621		0.838398	0.788575	0.902769		0.787554	0.750983		0.875824
0.754264	0.822357	0.844786		0.762705	0.816639	0.911311		0.782908	0.739849		0.877083
0.733759	0.760206	0.84101		0.785989	0.837459	0.906051		0.77555	0.758264		0.890109
0.763827	0.80924	0.825337		0.8273	0.831166	0.904425		0.766879	0.757532
0.779234	0.784999	0.824441		0.856462	0.828322	0.900438		0.779668	0.732636
0.806437	0.781138	0.842769		0.889602	0.795722	0.903436		0.748144
0.842565	0.777238	0.826568		0.88347	0.800098	0.899459		0.762774
0.850489	0.766186	0.84795		0.896818	0.809809	0.903391		0.718728
0.847204	0.751664	0.839492		0.894635	0.801903	0.896606		0.653943
0.863533	0.793857	0.820873		0.900159	0.771474	0.906663		0.613716
0.817811	0.805073	0.811806		0.886788	0.776567	0.909706		0.575391
0.841613	0.787921	0.841577		0.88968	0.760731	0.894674		0.601645
0.830868	0.771274	0.845503		0.898792	0.733673	0.910787		0.618635
0.840567	0.784424	0.866811		0.899809	0.763655	0.909526		0.617531
0.826278	0.771008	0.850647		0.887836	0.756376	0.90415		0.626266
0.819469	0.791398	0.821022		0.887894	0.764967	0.891576		0.606051
0.804561	0.71484	0.851969		0.891821	0.772659	0.900677		0.602383
0.804859	0.690993	0.854291		0.883348	0.786476	0.907464		0.611289
0.828376	0.705297	0.843134		0.883684	0.754001	0.898796		0.578728
0.805581	0.651238	0.831896		0.882473	0.77264	0.908292		0.579588
0.76837	0.666864	0.797959		0.877589	0.744924	0.899613		0.549435
0.803715	0.665886	0.835797		0.882539	0.803979	0.888269		0.561604
0.829383	0.716252	0.801404		0.89069	0.813975	0.878464		0.616659
0.836089	0.736868	0.731645		0.891956	0.78546	0.857582		0.674058
0.841639	0.7091	0.74944		0.900766	0.758453	0.857143		0.743783
0.842545	0.754502	0.750165		0.895028	0.723549	0.858859		0.785249
0.855163	0.771063	0.739459		0.910213	0.771014	0.847013		0.794787
0.871195	0.763362	0.770447		0.90066	0.816982	0.832242		0.799697
0.872374	0.792336	0.820714		0.899559	0.764849	0.824983		0.773281
0.867867	0.79612	0.800421		0.903444	0.726388	0.86711		0.801499
0.890896	0.785355	0.719592		0.902843	0.693629	0.870833		0.824787
0.895096	0.749531	0.657223		0.910234	0.771909	0.864769		0.7579
0.887223	0.701286	0.683749		0.908718	0.753999	0.850893		0.714323
0.875053	0.708191	0.748106		0.902129	0.720304	0.837006		0.762689
0.867366	0.769124	0.717707		0.906807	0.748956	0.849185		0.686725
0.88539	0.750762	0.752314		0.874872	0.733313	0.853682
0.866483	0.782477	0.826595		0.85728	0.733401	0.851031
0.84647	0.792979	0.870591		0.858467	0.708526	0.864971
0.855053	0.772214	0.877832		0.844704	0.746877	0.869289
0.859438	0.668171	0.861845		0.815191	0.682618	0.8812
0.854269	0.757036	0.841502		0.823404	0.7	0.871223
0.873524	0.630077	0.861769		0.830295	0.771788	0.834859
0.906472	0.603958	0.832948		0.826534	0.768218	0.868085
0.893392	0.529444	0.803034		0.849799	0.747757	0.869297
0.866219	0.622478	0.835275		0.870784		0.881497
0.861613	0.747041	0.850693		0.882347		0.882291
0.854515	0.71092	0.829032		0.886213		0.873064
0.853236	0.632627	0.823947		0.900953		0.889495
0.831447	0.574154	0.846243		0.899346		0.884599
0.849787	0.77101	0.821514		0.892424		0.882552
0.82743	0.807388	0.83611		0.892394		0.871316
0.882922	0.8	0.812029		0.910881		0.847625
0.903086	0.786505	0.799968		0.907658		0.857771
0.8198	0.779605	0.814473		0.906477		0.883483
0.745893	0.788264	0.853035		0.908586		0.884084
0.796451	0.787821	0.852257		0.909586		0.867116
0.850654	0.783182	0.824321		0.903392		0.878986
0.85155	0.782898	0.858836		0.90629		0.860826
0.883817	0.768229	0.846225		0.915055		0.875446
0.867539	0.784277	0.858348		0.912894		0.874586
0.890467	0.795202	0.844965		0.916472		0.871199
0.849985	0.768808	0.859249		0.914628		0.869565
0.868204	0.770959	0.850535		0.911385		0.876696
0.858391	0.774783	0.86363		0.910797		0.886881
0.855411	0.751109	0.862217		0.912791		0.90554
0.848561	0.751335	0.861612		0.906648		0.899172
0.830384	0.739142	0.876244		0.899118		0.899704
0.84327	0.688348	0.87499		0.910909		0.906931
0.857192	0.632426	0.833818		0.907163		0.906189
0.867238	0.603102	0.789456		0.915697		0.908488
0.860452	0.597393	0.79413		0.918044		0.90539
0.894236	0.674569	0.826803		0.90974		0.912421
0.889146	0.608732	0.794138		0.893116		0.890144
0.893012	0.591616	0.797532		0.890113		0.892117
0.888669	0.613431	0.809966		0.90824		0.889029
0.892584	0.627134	0.830758		0.898613		0.888213
0.892428	0.612458	0.84111		0.90477		0.889688
0.896036	0.646888	0.81237		0.901957		0.884951
0.887959	0.635898	0.802906		0.911368		0.895825
0.885276	0.627785	0.829199		0.905982		0.891645
0.903736	0.660383	0.79525		0.896012		0.903911
0.872376	0.695899	0.78733		0.891631		0.892586
0.857272	0.657066	0.791736		0.904917		0.888947
0.835817	0.708777	0.748078		0.908112		0.891198
0.833823	0.718727	0.715964		0.894088		0.878148
0.867117	0.688607	0.71084		0.884884		0.886848
0.810268	0.663534	0.75157		0.879062		0.879769
0.84027	0.686671	0.686092		0.887938		0.891949
0.840462	0.667991	0.766303		0.883718		0.875772
0.875261	0.711328	0.790441		0.894823		0.880089
0.865859	0.73379	0.728001		0.902652		0.899482
0.856357	0.775971	0.796112		0.898227		0.902404
0.880107	0.824259	0.796456		0.897147		0.914688
0.893644	0.752188	0.804259		0.897085		0.918597
0.807791	0.731626	0.830084		0.889577		0.915075
0.820884	0.720012	0.831617		0.893403		0.911259
0.801217	0.784845	0.859449		0.883497		0.904485
0.771107	0.805878	0.838341		0.880894		0.893852
0.766421	0.850344	0.849769		0.877315		0.90749
0.765783	0.848984	0.809585		0.886204		0.889267
0.788424	0.858382	0.790947		0.885074		0.912408
0.73701	0.879225	0.809749		0.874155		0.906387
0.700686	0.892853	0.809898		0.873681		0.909493
0.774739	0.886864	0.837444		0.881519		0.90536
0.715415	0.891375	0.843902		0.88988		0.899174
0.762609	0.894683	0.86457		0.891843		0.897713
0.767323	0.88848	0.865741		0.88818		0.908125
0.729432	0.893028	0.828879		0.885483		0.893362
0.748281	0.887778	0.807759		0.87784		0.898472
0.793894	0.904148	0.80332		0.876496		0.889344
0.818969	0.892731	0.786042		0.878667		0.89035
0.822699	0.899121	0.783738		0.87467		0.899493
0.759882	0.914921	0.784922		0.882797		0.895391
0.725643	0.912947	0.78056		0.885889		0.896112
0.736647	0.920079	0.785528		0.878085		0.90005
0.755875	0.931262	0.805945		0.900025		0.913022
0.689069	0.918709	0.816543		0.897714		0.909302
0.727486	0.919558	0.804069		0.898365		0.903017
0.719714	0.923256	0.809074		0.894545		0.894676
0.736421	0.933612	0.827833		0.903733		0.880591
0.781523	0.934555	0.827866		0.895804		0.872485
0.774132	0.936631	0.820294		0.898901		0.861307
0.751046	0.957407	0.848085		0.893216		0.837951
0.770713	0.960692	0.839981		0.908241		0.83266
0.707714	0.960796	0.809959		0.89834		0.828778
0.743599	0.962902	0.818058		0.896913		0.853931
0.748074	0.956962	0.822031		0.885046		0.86898
0.802171	0.957563	0.817097		0.875512		0.883104
0.783507	0.961524	0.762213		0.877422		0.872956
0.799867	0.961115	0.772859		0.87884		0.882117
0.795637	0.960812	0.798846		0.867197		0.880376
0.803462	0.964334	0.773413		0.862607		0.885936
0.857758	0.966935	0.812353		0.867174		0.895903
0.809493	0.965727	0.78762		0.888643		0.896777
0.796532	0.968821	0.76419		0.885462		0.899222
0.799055	0.972418	0.739626		0.890674		0.90135
0.80481	0.972119	0.780064		0.907292		0.903766
0.835933	0.971911	0.76799		0.898871		0.902047
0.83592	0.971572	0.737152		0.91315		0.895005
0.892409	0.971069	0.735543		0.909584		0.897214
0.899639	0.971152	0.718201		0.90441		0.894133
0.900139	0.974206	0.721707		0.884339		0.861143
0.891713	0.9717	0.778562		0.900468		0.865472
0.896472	0.970717	0.790173		0.918384		0.864589
0.895589	0.967157	0.77509		0.908194		0.857469
0.90019	0.969129	0.73436		0.910181		0.855098
0.912126	0.970074	0.767746		0.910284		0.847754
0.904962	0.969842	0.75987		0.910098		0.821469
0.897415	0.969072	0.734461		0.908513		0.850554
0.892002	0.968715	0.776923		0.907877		0.854455
0.889474	0.969046	0.738333		0.916539		0.832819
0.873451	0.966972	0.68184		0.918567		0.862872
0.861104	0.966494	0.741436		0.912919		0.853496
0.858853	0.962242	0.715584		0.914049		0.894705
0.853198	0.961916	0.722209		0.910958		0.896004
0.848916	0.959523	0.72638		0.914333		0.903078
0.849408	0.962812	0.751873		0.908499		0.895856
0.811354	0.960666	0.735749		0.917883		0.902786
0.805042	0.961607	0.769783		0.917409		0.902919
0.782824	0.958685	0.745339		0.917721		0.899878
0.786	0.955787	0.750114		0.924834		0.890967
0.813638	0.953539	0.79668		0.920039		0.885989
0.78865	0.949378	0.811928		0.916919		0.885146
0.784305	0.945009	0.765799		0.923484		0.890777
0.786139	0.94079	0.783501		0.918784		0.88747
0.783325	0.945891	0.768206		0.927323		0.888832
0.77793	0.94095	0.811817		0.94039		0.880678
0.784291	0.940141	0.787212		0.936943		0.877579
0.772336	0.947004	0.808728		0.922116		0.874409
0.774204	0.949509	0.809228		0.938165		0.863294
0.777898	0.953347	0.849709		0.939783		0.868412
0.792654	0.944854	0.804705		0.940147		0.852464
0.769368	0.945726	0.778558		0.936957		0.850007
0.784809	0.939504	0.805492		0.923345		0.843014
0.786116	0.942865	0.808981		0.938866		0.833558
0.770119	0.950869	0.755993		0.943335		0.83779
0.759774	0.947373	0.770623		0.940377		0.835237
0.763181	0.946529	0.784003		0.947988		0.826237
0.753906	0.956884	0.838678		0.950033		0.808215
0.763219	0.939249	0.80589		0.95078		0.816634
0.771585	0.943471	0.882534		0.947375		0.799329
0.804011	0.929588	0.864276		0.942667		0.773994
0.841179	0.921496	0.877962		0.942863		0.793114
0.786652	0.926379	0.882176		0.941573		0.796251
0.774838	0.928862	0.875377		0.938658		0.778971
0.77273	0.932955	0.853067		0.940716		0.781533
0.800851	0.939515	0.871116		0.956782		0.782386
0.802046	0.933306	0.874735		0.947303		0.780179
0.832356	0.891158	0.876935		0.931734		0.79617
0.815771	0.894105	0.875279		0.942646		0.799549
0.824828	0.907608	0.89134		0.930424		0.791619
0.840102	0.899138	0.901435		0.921001		0.795534
0.848831	0.902922	0.903435		0.900973		0.787886
0.839857	0.879946	0.89343		0.868744		0.791963
0.847207	0.891909	0.884207		0.832568		0.769981
0.850519	0.899006	0.873036		0.84348		0.740117
0.843375	0.888628	0.875019		0.832242		0.761918
0.849575	0.91517	0.891223		0.815789		0.754173
0.845161	0.875577	0.89415				0.73227
0.86588	0.872243	0.903098				0.723682
0.853312	0.867344	0.90504				0.764215
0.868884	0.852112	0.867953				0.771936
0.880048	0.851061	0.872992				0.776726
0.884352	0.879394	0.871307				0.749761
0.886729	0.836239	0.869329				0.738688
0.901125	0.873395	0.851563				0.717005
0.888866	0.786247	0.858744				0.699029
0.890243	0.895683	0.840927				0.639749
0.894396	0.927043	0.813764
0.904096	0.911479	0.85521
0.904733	0.860919	0.823457
0.906423	0.853043	0.807239
0.940334	0.824068	0.84
0.947904	0.793941	0.838457
0.945545	0.80387	0.845892
0.946224	0.811622	0.854507
0.952674	0.811349	0.85429
0.953739	0.754921	0.857689
0.958173	0.643735	0.848995
0.955498		0.873373
0.956525		0.847276
0.957682		0.862827
0.958825		0.869612
0.957889		0.882968
0.957976		0.882693
0.958338		0.888679
0.957893		0.893736
0.958205		0.882442
0.958485		0.88556
0.951201		0.860331
0.951345		0.887738
0.954647		0.878829
0.954391		0.886208
0.956121		0.880549
0.959488		0.883254
0.961612		0.887227
0.962396		0.873188
0.959682		0.887513
0.965729		0.886585
0.958311		0.919282
0.955719		0.906091
0.956126		0.914243
0.956767		0.882149
0.953556		0.868423
0.958547		0.883698
0.962552		0.886789
0.961486		0.895495
0.958474		0.906071
0.9552		0.912281
0.961217		0.901146
0.956118		0.897962
0.95672		0.911656
0.958412		0.908306
0.955521		0.931026
0.95598		0.923721
0.95922		0.906157
0.959848		0.918966
0.957062		0.926679
0.970299		0.922392
0.967087		0.91308
0.974135		0.899384
0.97178		0.873882
0.971092		0.873078
0.967932		0.863471
0.96259		0.857602
0.965361		0.890037
0.959612		0.892853
0.96949		0.863712
0.968599		0.885032
0.957034		0.858261
0.959894		0.829604
0.959426		0.84437
0.956736		0.801967
0.963614		0.830842
0.964064		0.797941
0.959355		0.743295
0.965764
0.965724
0.961824
0.962253
0.965286
0.964
0.966223
0.962114
0.970008
0.971189
0.972786
0.979122
0.971761
0.971806
0.973263
0.969991
0.97071
0.974682
0.958641
0.973628
0.963085
0.974523
0.979587
0.977573
0.966735
0.960785
0.958313
0.95116
0.946542
0.949127
0.9499
0.951325
0.924319
0.892488
0.84191
0.814486
0.800641
0.809462
0.797601
0.759292
