# Supplementary material for: Bi-channel image registration and deep-learning segmentation (BIRDS) for efficient, versatile 3D mapping of mouse brain
Source: eLife. 2021 Jan 18;10:e63455. doi: 10.7554/eLife.63455 (PMC7840180; doi:10.7554/eLife.63455)
Supplement: Supplementary file 1. [file elife-63455-supp1.xlsx]

## Sheet: table_1
Stage	Dataset（180G）	Resolution (μm3)	Volume (pixel3)	Image format	Data size (GB)	Speed	Memory (GB)
1: image preprocessing (segmented downsampling)	raw image （Brain 1）	1*1*10	11972*7536*1075	16bit	180	15~25 (min)	200
	Allen Reference Atlas	20*20*100	570*400*132	RGB	0.336
2: Registration	fix image (the result of image preprocessing)	20*20*20	598*376*537	8bit	0.115	20~45 (min)	30
	move image (average template)		570*400*660	8bit	0.137
	registration result		598*376*537	8bit	0.115
3: Transformation (the parameter from registration)	annotation file	20*20*20	570*400*660	16bit	0.137
	annotation file（after registration）		598*376*537	16bit	0.115
4： 3D digital framework	annotation file （high resolution）	1*1*10	11972*7536*1075	16bit	180	40~60 (min)	330
Stage	Dataset（320G）	Resolution (μm3)	Volume (pixel3)	Image format	Data size (GB)	Speed	Memory (GB)
1: image preprocessing (segmented downsampling)	raw image （Brain 3）	1.25*1.25*1.25	6048*3772*7344	16bit	320	1h~1.5h	340
	Allen Reference Atlas	20*20*100	570*400*132	RGB	0.336
2: Registration	fix image (the result of image preprocessing)	20*20*20	378*235*459	8bit	0.113	20~45 (min)	30
	move image (average template)		570*400*660	8bit	0.137
	registration result		378*235*459	8bit	0.113
3: Transformation (the parameter from registration)	annotation file	20*20*20	570*400*660	16bit	0.137
	annotation file（after registration）		378*235*459	16bit	0.113
4： 3D digital framework	annotation file （high resolution）	1.25*1.25*1.25	6048*3772*7344	16bit	320	2.5h~3.5h	680
