# Supplementary material for: Bi-channel image registration and deep-learning segmentation (BIRDS) for efficient, versatile 3D mapping of mouse brain
Source: eLife. 2021 Jan 18;10:e63455. doi: 10.7554/eLife.63455 (PMC7840180; doi:10.7554/eLife.63455)
Supplement: Supplementary file 2. [file elife-63455-supp2.xlsx]

## Sheet: table_2
				Training dataset 1	Test dataset 1
			image size (input)	660*400 (sagittal view)	660*400 (sagittal view)
			numbel class	18 (regions)+1 (background)	18 (regions)+1 (background)
			regions	Isocortex, HPF, OLF, CTXsp, STR，PAL, CB, DORpm, DORsm, HY, MBsen, Mbmot, Mbsta
				P-sen, P-mot, P-sat, MY-sen, and MY-mot
			training set size (slice)	5000 (complete)+4500 (incomplete)
				Training dataset 2	Test dataset 2
			image size (input)	570*400 (coronal view)	570*400 (coronal view)
			numbel class	4 (regions)+1 (background)	4 (regions)+1 (background)
			regions	CA1, CA2, CA3, DG
			training set size (slice)	1100
