# Supplementary material for: Bi-channel image registration and deep-learning segmentation (BIRDS) for efficient, versatile 3D mapping of mouse brain
Source: eLife. 2021 Jan 18;10:e63455. doi: 10.7554/eLife.63455 (PMC7840180; doi:10.7554/eLife.63455)
Supplement: Supplementary file 3. [file elife-63455-supp3.xlsx]

## Sheet: table_3
	aMAP	ClearMap	MIRCL	BIRDS
Brain1	294.832	135.642	117.165	82.5058
Brain2	137.437	112.525	111.221	70.8871
Brain3	342.825	201.36	147.429	124.062
Brain4	311.146	348.786	139.901	136.851
Brain5	374.965	223.916	239.178	105.534
	aMAP	ClearMap	MIRCL	BIRDS
Brain1	0.77849	0.865689	0.867983	0.921708
Brain2	0.874065	0.920113	0.871917	0.932712
Brain3	0.755605	0.832311	0.831696	0.872965
Brain4	0.747635	0.710616	0.842705	0.872369
Brain5	0.574372	0.720246	0.644604	0.881183
	aMAP	ClearMap	MIRACL	BrainMap
ACA	0.802114	0.876054	0.914945	0.924126
ENT	0.790169	0.863961	0.842705	0.922507
MV	0.729799	0.616026	0.721541	0.882339
PAG	0.816968	0.853247	0.825557	0.903342
RT	0.565645	0.595875	0.829755	0.838269
SSp	0.815749	0.879905	0.873099	0.944174
SUB	0.593293	0.648913	0.744829	0.798953
VISp	0.825859	0.857342	0.861554	0.943043
VMH	0.686827	0.690989	0.802344	0.820702
